# Supplementary material for: HFR1 Is Crucial for Transcriptome Regulation in the Cryptochrome 1-Mediated Early Response to Blue Light in Arabidopsis thaliana
Source: PLoS One. 2008 Oct 30;3(10):e3563. doi: 10.1371/journal.pone.0003563 (PMC2570330; doi:10.1371/journal.pone.0003563)
Supplement: Data S1 — Gene expression profiles of all 22,810 genes on the Arabidopsis Affymetrix ATH1 microarray. (8.57 MB XLS) [file pone.0003563.s001.xls]

## Sheet: Raw Data
Expression profiles of all 22,810 genes on the Arabidopsois Affymetrix ATH1 microarray.
Systematic ID	cry1 replicates in 1 h blue light			cry1 replicates in the dark			hfr1 replicates in 1 h blue light			cry1 replicates in the dark			WT replicates in 1 h blue light			WT replicates in the dark
	1	2	3	1	2	3	1	2	3	1	2	3	1	2	3	1	2	3
244901_at	18.3596	21.108	16.8678	17.8041	20.4567	16.5793	17.9038	17.8092	13.459	16.3843	18.2124	21.1653	41.6749	42.7095	39.4851	16.9665	18.8046	15.7955
244902_at	8.75733	11.2271	8.36613	10.1555	11.1783	9.7412	10.3094	7.69505	10.0466	8.77749	16.0025	23.005	20.0828	10.2848	23.4746	10.0815	10.4801	10.6941
244903_at	59.4966	58.0243	51.0026	53.161	52.3806	59.1311	59.4721	34.2874	69.2997	49.3984	40.3724	52.1723	53.637	56.9522	48.0436	40.6319	53.2112	41.8825
244904_at	11.3039	12.111	12.8554	14.6432	15.6753	20.0812	11.1192	9.64524	13.0882	12.7303	11.5788	12.5558	14.3361	12.9614	14.302	11.1014	18.3069	12.5249
244905_at	6.12483	6.06076	6.02947	5.76782	6.07072	5.88896	7.39508	6.17079	6.21097	5.74041	5.36643	8.33338	6.32841	6.40372	6.90252	5.84318	5.7397	7.11089
244906_at	9.82458	11.4403	9.55709	17.0819	13.9796	19.7958	11.246	9.59446	10.3594	18.6258	9.06552	19.506	15.4614	17.8939	14.7023	10.9835	12.1474	10.5105
244907_at	6.57376	6.45177	6.43695	6.00574	6.1911	6.20332	6.54359	6.69036	6.74444	6.88553	7.43223	6.25141	10.8151	8.61956	8.5098	5.89913	6.55542	6.0374
244908_at	5.92123	6.67608	5.77256	5.58205	5.73169	5.66172	5.66335	5.78348	6.32321	5.15681	5.58205	5.52547	6.23167	6.42295	6.38533	5.27031	5.03912	5.16147
244909_at	4.78062	6.32918	4.7415	4.56079	4.76807	4.0778	4.78887	5.5382	5.81517	4.69885	4.85044	4.47247	4.92817	5.2623	5.57769	4.91018	4.40031	4.52458
244910_s_at	5.82353	5.9976	5.53569	6.70026	5.88945	5.83095	5.57449	5.85616	6.39662	5.62186	5.82305	5.52252	6.16521	6.66841	6.59594	5.50893	5.35542	5.52252
244911_at	8.05537	7.74166	7.58521	7.42674	7.2275	6.65527	9.32691	8.40005	8.24045	6.87197	8.81652	7.81676	9.62604	10.3206	12.3129	7.05502	12.4697	6.37171
244912_at	99.5626	89.4259	97.2824	63.9533	99.5994	71.9835	102.402	77.8683	151.26	52.1927	20.1506	57.1303	149.156	144.833	170.025	16.9934	53.8655	45.6184
244913_at	5.3116	4.60824	4.48204	5.32777	4.62949	6.36229	4.51938	4.69306	4.65008	4.61506	4.50863	4.45853	5.31116	4.88985	4.89186	4.82778	4.56678	4.45853
244914_at	14.3243	14.4579	9.00909	7.92409	8.76489	7.93582	8.72	12.4148	13.9298	9.99904	9.10134	10.2907	13.4761	14.5264	14.2416	9.92049	10.0353	10.4372
244915_s_at	4.6946	4.58728	4.57448	4.40284	4.58747	4.35035	4.55124	4.73878	4.80404	6.57295	4.53463	4.31653	5.11356	5.29983	5.2317	4.70464	4.34106	4.37526
244916_at	5.25928	5.23083	5.17017	5.11587	5.25452	5.18292	5.16889	5.28309	5.3407	5.18846	5.28548	5.85616	5.52502	5.67942	5.67942	5.16337	5.06464	5.90495
244917_at	4.78868	4.83612	4.68901	4.36861	4.70831	4.97577	4.70696	4.78494	5.32777	4.72867	4.55311	4.48038	4.80227	4.95008	4.90676	4.71354	4.42333	4.47891
244918_at	5.92707	5.81015	5.788	5.55095	5.55392	5.40736	5.52729	6.35445	6.1286	5.74961	5.49401	5.40736	8.10849	6.50793	6.90933	5.67639	5.39627	5.46094
244919_at	6.04882	6.17408	6.10825	6.94547	6.19237	6.11879	5.86265	6.44568	5.82688	8.13417	8.63729	8.37008	7.11381	6.72176	6.35185	7.29851	5.30702	6.71183
244920_s_at	68.7186	63.283	65.1773	103.295	64.7424	65.4725	65.1345	53.9419	81.0603	56.7071	38.2306	60.6714	102.072	62.6623	93.7478	45.34	54.4741	46.2676
244921_s_at	43.0831	47.5762	42.367	43.1681	40.5194	35.1069	35.1069	38.8974	40.682	33.4403	22.0193	51.1453	76.0944	80.0954	51.398	20.1626	40.836	27.7635
244922_s_at	13.5711	13.4203	13.0496	14.6896	14.4752	13.0399	13.3648	11.7663	22.7699	12.6256	9.68216	10.5692	13.9704	19.7191	19.146	12.9769	9.7396	11.8965
244923_s_at	7.64119	7.50556	7.49447	7.32644	8.45544	10.7819	7.41485	7.55722	6.61575	7.28922	7.36023	11.7973	7.79015	4.59935	6.61793	7.053	12.8511	7.25815
244924_at	8.52695	17.9447	7.24817	8.42805	7.62849	8.72824	17.5759	12.9192	31.7823	7.1217	6.61059	8.42805	12.2539	10.3331	8.74546	8.42805	7.03058	7.61081
244925_at	17.3492	16.8734	20.2593	16.7024	17.506	23.8929	17.4529	18.0315	18.5605	17.1713	16.7628	18.8316	20.2244	20.5611	19.2343	16.582	19.6754	16.548
244926_s_at	5.83455	5.988	5.65521	6.1637	6.04931	5.88075	5.9615	5.64407	5.95954	5.98308	6.18729	5.93413	6.56081	6.45813	6.67389	5.40181	8.10515	5.72369
244927_at	11.0677	10.4098	10.4098	9.21116	10.2065	8.461	13.3697	10.4741	13.9831	10.027	9.93109	11.5864	12.4291	10.7814	10.6267	9.84579	10.0163	9.80302
244928_s_at	16.5637	16.6729	16.3125	17.0875	20.6534	16.191	17.2271	13.3774	17.0875	17.1121	16.1206	19.2888	17.7354	17.392	17.5802	16.4214	18.9433	16.279
244929_at	105.028	79.09	64.7184	67.1227	57.7342	72.09	68.857	64.2258	82.437	45.6333	30.7611	69.2428	83.0249	84.8802	102.695	40.0716	44.9598	52.4862
244930_at	4.72808	4.72187	4.78553	4.60976	4.52728	4.91644	4.69981	6.54466	4.91785	4.6392	4.64797	4.5651	5.60733	5.94645	5.21539	4.61487	4.37921	4.58558
244931_at	14.9127	14.9164	12.5126	14.1553	15.884	12.0723	13.4645	13.6219	13.4104	24.6962	15.7282	20.2327	15.0704	16.4768	13.9538	14.6806	15.6341	14.6372
244932_at	59.0619	97.4365	62.937	32.5346	20.7461	28.7211	144.967	125.672	131.093	15.8286	12.7851	38.0512	58.2607	76.0116	79.3879	13.1715	10.2504	7.81114
244933_at	37.0669	56.0574	23.8851	18.0882	14.3029	13.0496	180.864	151.801	140.543	12.7279	8.62328	14.7923	23.7174	40.0725	25.8499	11.4725	10.0722	12.7405
244934_at	11.0215	31.665	7.06778	5.81672	6.15383	4.33136	99.2685	77.5363	81.4123	3.89789	5.16497	6.27908	6.97707	6.55744	6.54345	5.29396	4.99327	3.76128
244935_at	1088.48	1891.94	1330.84	286.552	373.606	385.961	729.348	752.632	632.068	343.123	161.058	612.891	1212.36	1522.42	1352.31	251.132	381.954	237.79
244936_at	512.475	676.253	453.132	93.4517	108.553	98.1495	285.859	166.5	194.812	118.846	41.8034	219.63	490.106	617.034	468.213	53.2561	144.833	61.0789
244937_at	22.8881	37.4334	40.2639	19.1664	14.7392	25.0158	34.43	31.7405	29.9667	20.8932	12.5956	25.0158	29.727	33.5036	29.2089	12.4426	26.6626	12.7319
244938_at	32.9698	49.8756	34.2002	29.6313	25.5339	21.2132	40.6085	41.6834	36.6152	20.8503	13.3061	30.2312	39.4948	42.6744	31.6728	13.6303	22.4615	15.933
244939_at	32.7229	34.1161	31.4873	43.3182	23.6809	34.1609	43.1362	34.3975	32.0458	21.3917	10.874	40.1243	28.9669	36.7357	32.2531	17.0434	26.4021	23.9558
244940_at	341.197	455.952	303.652	422.066	346.579	376.703	283.357	180.479	341.983	298.348	158.232	591.52	230.528	313.049	232.172	259.981	360.549	283.52
244941_at	13.912	17.2129	12.0619	12.688	13.1486	12.6464	13.0539	13.2157	20.296	13.2887	12.5925	11.7479	13.7608	14.4348	14.9588	13.2887	14.0453	12.3441
244942_at	4.10655	4.09106	4.0363	4.0363	4.07295	3.99474	4.02968	4.12413	4.08367	4.25526	3.43768	3.93739	4.44281	4.52682	4.50974	4.19039	3.89237	4.49975
244943_at	13.9343	15.7356	13.5516	13.2331	19.5457	15.5841	13.6264	9.77828	8.28304	20.4348	21.6107	21.9264	36.6031	15.2748	22.631	16.4281	19.9546	19.51
244944_s_at	51.8476	62.0118	47.1501	69.2854	58.8403	67.5681	51.5418	32.1473	42.7973	40.6519	37.9629	62.3848	87.5143	58.177	104.165	28.1829	48.8295	39.8222
244945_at	12.8585	12.4061	12.2602	12.4705	12.7481	11.9088	13.9773	15.1008	13.2152	12.5858	11.2826	12.8628	13.6949	13.9745	13.9343	12.4705	12.1729	11.8829
244946_at	5.92585	7.7261	5.87157	5.95195	6.71873	6.04186	13.6803	21.6054	12.4515	6.19975	5.72298	5.5307	6.63289	6.6318	7.00794	11.0287	6.84211	6.4519
244947_at	5.36466	5.65521	7.80553	4.67536	5.49131	4.9448	7.16042	8.17403	5.81349	5.24439	5.07235	5.26208	6.44674	8.03851	6.39478	4.82164	4.81096	5.20063
244948_at	6.83817	6.65527	6.65527	6.60516	6.6408	6.46982	6.65527	6.7672	7.05213	6.60516	6.60516	6.51891	7.24653	7.40116	7.22364	8.68817	6.42955	6.45018
244949_at	6.89175	5.30353	5.24224	5.00817	5.21689	4.94155	5.2375	7.67801	5.71828	5.29591	5.07172	4.93506	6.29677	6.0882	6.05031	5.11545	4.85942	5.88364
244950_at	16.0015	16.757	13.2898	12.2459	14.144	12.0285	15.915	11.9752	16.0384	17.5661	14.7743	14.1402	46.8875	38.5856	37.9061	11.2338	15.0806	12.0342
244951_s_at	64.3063	72.0309	53.7174	73.6343	107.928	82.773	60.0984	57.6442	65.7055	96.0752	84.338	104.576	87.4281	82.727	99.7591	73.9618	108.365	97.699
244952_at	7.24385	7.2183	7.17396	7.11761	7.60362	6.61086	8.15525	7.86345	7.52161	7.42155	6.44144	7.11761	7.6055	7.84217	7.83058	6.7461	7.00622	7.07563
244953_s_at	6.70935	6.97062	6.54681	5.77422	6.52963	6.22335	8.50194	6.91799	7.47356	6.28101	6.50326	6.35472	14.0571	10.8557	12.3985	5.53934	6.28979	6.31386
244954_s_at	15.6129	14.3768	14.5575	13.1286	14.9373	13.0533	14.3626	16.4606	15.754	17.4593	20.296	16.5344	24.4449	21.8508	21.2944	15.1225	16.5304	13.1205
244955_at	5.56625	6.02303	5.63295	5.56671	5.4868	5.84726	5.59146	5.72769	5.70561	5.30855	5.62833	5.49943	6.6378	6.51623	5.87302	5.22332	5.22118	5.16698
244956_s_at	7.5108	7.10388	7.01226	7.84958	7.70834	7.32013	7.62959	8.16531	10.4982	9.53925	8.20262	7.8174	8.79843	10.9286	8.50107	7.84958	7.81162	6.9996
244957_at	13.1778	12.4541	12.7497	15.38	13.194	14.0366	14.3821	13.4933	27.4009	14.4081	18.5027	19.8393	12.2693	16.2116	15.3238	13.7196	15.7501	18.3182
244958_at	8.9068	7.65156	9.35454	12.9758	8.43532	9.31849	9.4317	11.9088	8.6996	8.11015	7.32554	9.34186	8.76488	8.7811	9.45032	8.13551	9.50209	8.53922
244959_s_at	51.0445	46.5899	38.2015	46.3018	49.5814	44.1291	57.8339	40.5885	62.1648	31.433	22.5539	41.4853	51.1306	56.9194	53.0911	21.4797	49.3579	29.6021
244960_at	1363.35	1723.61	1208.33	250.673	201.408	219.418	856.688	383.976	375.043	185.332	210.224	515.611	1120.28	1112.78	1534.82	184.823	276.737	96.3915
244961_at	922.109	1045.49	803.825	172.473	183.073	196.799	788.487	679.316	916.106	107.698	77.9803	257.959	862.602	1084.33	1018.82	86.916	98.4685	69.665
244962_at	382.142	624.787	302.805	71.4268	54.0905	68.2782	335.209	207.449	316.814	19.9464	10.8209	55.3538	288.069	503.751	407.014	7.85441	9.42841	8.30501
244963_at	815.884	1028.74	560.542	303.328	327.344	229.748	475.657	498.768	425.696	606.978	400.069	678.953	763.123	993.037	862.921	141.278	568.298	299.108
244964_at	268.738	560.531	295.797	94.1568	118.754	106.012	270.515	255.135	217.547	174.59	86.1837	205.764	446.004	491.225	358.121	39.7903	152.382	108.303
244965_at	39.8689	86.5384	39.9271	39.257	14.8339	43.795	69.6078	45.7497	53.8721	44.2689	32.0524	109.04	47.4611	59.9664	54.3601	54.1995	55.6525	41.305
244966_at	16.5453	48.4022	22.2695	9.78813	13.8237	11.9696	67.6848	65.9394	46.8432	11.1101	9.63376	15.5515	23.5645	29.0945	23.022	8.98654	10.6323	8.5726
244967_at	576.053	1090.07	578.365	759.307	708.936	685.722	407.968	265.872	308.708	325	220.928	730.143	556.561	846.177	594.919	108.595	266.884	136.963
244968_at	1230.34	1576.71	1098.31	399.207	490.056	387.342	753.218	552.541	472.25	412.857	235.109	606.106	1069.29	1564.36	1118.53	93.2139	355.789	190.766
244969_at	298.998	402.326	266.118	93.0533	88.0787	98.1091	172.374	108.72	125.098	89.6096	55.3925	148.911	235.728	297.784	385.137	25.7911	68.9391	39.8026
244970_at	20.3896	24.0051	21.5956	32.3633	19.5449	31.2348	68.6339	80.0511	73.6223	15.3974	11.3859	19.4924	21.2389	25.4982	26.3338	16.2436	17.6316	11.8351
244971_at	927.733	1283.23	871.023	558.359	539.964	454.615	1021.59	882.221	1047.16	300.34	206.904	464.936	977.336	1191.74	891.273	272.009	312.273	224.69
244972_at	94.1143	171.199	115.782	52.7715	31.1976	56.5791	323.694	330.248	297.43	16.529	9.32672	58.5174	58.0219	70.7828	37.1035	9.70725	9.37801	7.43285
244973_at	35.8671	117.511	47.3783	8.54676	11.7963	9.03243	152.151	131.262	109.41	5.30244	5.03995	12.2703	20.9327	23.7833	35.1892	7.01716	5.50825	5.36114
244974_at	40.1862	33.1375	30.4275	20.321	16.4677	16.1001	65.6893	68.2502	41.6492	16.9091	12.4135	21.6903	33.5139	34.4151	39.6036	12.3931	14.3809	11.7197
244975_at	744.116	1108.28	799.774	95.5086	141.167	148.935	551.826	413.528	438.069	112.467	26.1034	272.143	669.097	865.53	577.048	30.957	187.603	70.5057
244976_at	2311.6	3919.61	2211.56	427.106	620.491	530.086	1359.36	1235.18	1306.98	485.747	179.724	835.522	1875.61	2176.95	1886.04	199.198	545.673	322.519
244977_at	4.48664	8.76578	4.70425	4.45222	5.15702	4.57467	37.1042	63.7186	47.6388	4.34874	4.29336	4.51215	5.43274	5.10192	5.36863	4.63901	4.93303	4.39552
244978_at	1457.88	2821.73	1502.82	649.45	725.538	673.232	985.418	1041.29	681.468	733.283	863.701	1087.78	1871.15	1944.13	1729.46	890.267	952.739	846.89
244979_at	786.676	1598.49	976.954	622.61	866.651	706.321	511.739	536.361	423.412	889.5	758.03	1159.42	997.698	1236.3	1047.59	693.441	1251.91	1282.17
244980_at	429.022	739.5	488.297	317.975	346.259	359.905	290.624	270.855	201.114	370.26	253.131	558.726	534.678	662.873	574.742	171.361	579.316	426.186
244981_at	273.274	321.125	229.028	107.461	110.059	124.391	180.149	156.23	135.039	129.884	78.795	156.77	273.724	353.814	381.884	58.7268	207.453	161.369
244982_at	147.899	282.764	169.426	116.411	151.266	153.318	154.481	171.4	176.588	177.723	102.855	188.213	238.063	290.953	210.912	72.5118	255.828	166.719
244983_at	1314.76	1783.79	1553.82	799.511	683.065	648.611	759.963	642.67	646.802	656.68	611.683	1100.75	1543.64	1631.53	1437.4	1004.3	1029.21	741.172
244984_at	1307.71	1535.23	1352.73	234.502	228.192	277.266	702.242	520.837	448.908	327.015	281.166	444.596	1504.61	1796.81	1480.18	413.808	450.035	335.781
244985_at	907.79	1130.63	1151.54	231.164	249.908	190.648	508.074	466.102	418.509	264.288	197.739	461.529	1200.71	1487.5	1003.82	258.384	390.73	386.547
244986_at	2064.47	3277.43	2385.88	590.816	586.837	704.032	969.279	589.204	869.004	488.197	434.592	1271	2351.68	2677.53	2754.56	606.093	828.005	608.688
244987_s_at	3411.07	5524.07	4098.93	1618.31	1636.23	1620.18	1585.68	1334.4	1304.27	1772.54	738.21	3090.83	3661.4	6296.99	4514.71	1069.77	2227.7	1153.62
244988_s_at	791.586	1408.18	866.58	208.929	226.092	218.765	672.431	719.114	629.14	324.326	117.102	445.253	1050.74	1161.94	1030.78	130.097	350.228	210.41
244989_s_at	6.91614	19.0073	8.18714	6.59188	6.38822	6.71114	42.8695	51.652	45.6118	6.41346	6.25449	6.40451	8.55045	7.49016	6.87733	8.24654	5.96713	6.39399
244990_s_at	25.1028	82.0789	16.9585	16.9411	15.0763	13.4126	86.097	96.2648	48.9963	15.4246	14.6779	12.6922	25.1663	33.6042	29.9396	21.2804	16.048	14.6706
244991_s_at	6.17992	25.8627	5.24859	8.82812	4.3722	6.30894	60.2541	83.3068	67.0497	6.63944	4.20521	4.96107	5.0294	4.95537	6.43695	6.02452	7.26217	6.69655
244992_s_at	675.255	863.737	474.798	856.564	665.616	690.882	538.923	632.639	800.367	521.887	306.988	1050.48	477.105	628.882	610.655	644.998	640.167	461.548
244993_s_at	458.412	843.125	520.773	128.298	118.097	124.59	319.716	260.564	239.294	119.331	87.5773	177.764	497.694	536.626	506.958	105.608	149.964	113.741
244994_at	8.10948	8.48328	8.03158	7.65533	7.80008	7.15542	13.5627	14.0631	9.83205	7.2656	7.23017	6.5889	12.2335	12.2521	9.44411	7.94234	6.2947	6.67389
244995_at	13.7931	19.3551	10.4503	11.713	11.7501	12.2464	46.6828	31.8653	38.9766	8.20548	8.6937	13.1724	13.6511	17.249	14.3341	9.63435	9.63257	9.28486
244996_at	130.234	202.615	154.05	55.7463	67.0731	54.9889	120.384	110.039	109.226	47.0282	26.1388	76.9557	152.226	197.771	119.906	42.8844	69.4821	35.229
244997_at	52.2485	102.083	56.2974	34.9465	32.8758	41.2	68.881	73.5845	75.4702	31.0716	15.5018	37.4795	52.1198	74.1306	60.1144	13.8638	30.686	26.818
244998_at	180.846	192.624	119.497	64.9101	79.9212	59.0474	177.972	140.128	105.617	28.4493	15.3661	65.4107	121.93	142.128	111.195	25.4511	54.2954	27.9925
244999_at	7.51049	18.2056	12.5481	6.90025	7.33879	7.4917	44.898	49.6313	73.6086	7.08843	5.69765	6.61439	8.10782	9.64088	8.5336	5.83503	5.99772	7.77385
245000_at	27.17	76.823	30.327	49.3092	56.3634	50.3469	83.7374	63.5044	89.0555	69.1802	40.9519	54.6489	18.1713	43.7195	33.8786	45.9286	48.2751	45.3791
245001_at	3605.58	4654.34	3605.14	961.624	1035.7	913.813	2737.02	1876.08	2271.31	1224.55	924.156	1834.5	3895.21	4854.89	4684.36	781.522	1040.13	556.196
245002_at	60.0663	119.719	82.8886	45.0337	31.4964	44.349	139.381	96.1245	111.323	25.6938	16.5331	34.8033	37.5612	53.6899	43.1486	13.6539	43.9708	11.3509
245003_at	167.117	265.398	253.839	91.1466	52.1895	87.651	187.272	132.06	188.29	54.3344	19.2315	102.345	134.576	206.471	108.917	11.9927	98.6466	16.4194
245004_at	197.662	359.573	181.464	59.7378	51.1001	58.4321	161.379	156.65	145.965	53.5533	34.7925	71.8461	138.085	175.821	162.273	58.8222	87	81.3722
245005_at	7.66524	44.759	8.0329	7.42034	7.63429	7.7972	126.104	143.173	106.13	8.17873	7.47756	7.04084	8.36957	10.0542	8.01938	7.54451	6.65842	7.44018
245006_at	1061.89	1368.94	868.13	395.884	338.19	316.294	701.175	458.751	794.045	235.003	196.836	551.384	727.462	1207.17	898.146	325.2	390.674	312.459
245007_at	201.379	250.967	213.316	38.1936	33.3402	55.5222	133.791	132.786	203.065	32.9596	11.6451	57.3183	121.283	217.43	149.478	5.18303	46.7989	14.3945
245008_at	32.3234	74.2693	29.7288	52.498	42.261	49.7794	85.7246	95.5125	88.0082	31.6351	22.5248	60.8436	27.4066	55.4426	25.188	32.578	57.1819	45.422
245009_at	470.063	746.596	552.609	131.322	116.612	148.368	385.042	351.367	358.953	80.8507	70.3783	209.47	402.723	718.908	517.563	86.9089	107.073	77.6192
245010_at	20.0903	44.0639	19.5987	13.1962	9.94416	10.1322	81.719	97.6188	101.595	10.2958	8.74654	13.0539	12.6776	14.7683	17.7376	11.7161	12.9131	8.72215
245011_at	19.7669	47.6388	19.0362	14.0291	13.9309	13.1713	99.5892	101.708	100.022	10.3594	10.1347	15.6643	16.0658	12.7081	12.6477	11.2731	10.7737	10.7686
245012_at	1077.89	1513.07	1071.93	293.51	349.984	325.996	911.096	756.724	703.368	481.061	440.641	623.659	869.271	958.057	1042.57	575.675	475.471	497.694
245013_at	4200.09	6666.86	4157.52	2164.74	2333.97	1722.4	2252.96	2271.17	2347.05	1470.09	1166.08	2858.6	4439.4	5481.01	4943.64	2423.07	2393.79	2121.86
245014_at	5557.88	7829.09	5798.43	1327.38	1412.9	1423.27	2665.02	2138.18	2703.5	1297.41	889.993	2161.4	5524.42	6538.58	5284.37	1372.23	2009.99	1745.63
245015_at	115.905	189.337	134.408	102.606	114.976	102.311	212.407	248.965	213.212	54.0484	42.785	112.764	120.766	122.625	106.012	43.0406	74.7805	37.5412
245016_at	60.0898	114.427	102.819	53.6601	50.2364	60.73	117.124	95.8722	117.22	49.8592	24.9343	80.8591	91.4316	115.12	82.7849	22.7985	56.4862	41.3806
245017_at	173.839	260.472	161.98	74.4373	81.7995	71.8535	112.158	145.884	128.813	49.7722	43.9419	104.714	160.866	192.095	194.117	48.7774	72.9779	49.7855
245018_at	238.181	285.659	311.171	93.9578	125.92	145.875	325.882	397.505	296.612	113.332	78.5267	144.77	380.021	379.335	332.439	26.7575	124.501	76.7015
245019_at	578.472	645.011	684.343	111.387	129.713	135.698	519.448	526.841	484.143	107.362	80.9637	191.681	705.842	889.701	762.934	72.7071	149.131	111.717
245020_at	539.987	718.937	597.897	175.532	156.487	145.196	500.677	473.396	513.951	166.268	230.244	226.455	582.12	680.349	781.137	164.806	164.421	170.361
245021_at	502.098	882.421	504.383	306.27	274.715	302.923	318.17	204.496	234.035	435.119	350.171	654.365	709.957	667.806	745.064	132.009	374.912	281.096
245022_at	174.397	274.354	175.007	51.8912	44.9432	49.4066	117.244	123.059	107.362	85.5698	48.4718	101.593	234.704	250.637	276.936	23.477	55.3242	40.7347
245023_at	846.004	1390.02	817.377	411.646	343.842	376.595	597.749	333.773	433.986	252	215.806	588.032	636.209	1021.54	919.783	295.506	415.614	267.439
245024_at	1051.26	1139.96	912.538	258.193	303.29	218.307	489.935	328.3	558.233	140.676	77.3868	319.126	932.853	1374.63	1095.16	118.851	222.737	89.5288
245025_at	124.542	150.55	110.179	113.918	127.45	97.1846	96.3064	62.3195	91.7533	76.6449	27.2875	125.866	148.737	173.536	132.264	29.9765	94.9122	50.1962
245026_at	245.149	454.493	230.49	292.98	358.246	354.149	534.316	301.638	496.478	228.497	83.3838	463.067	286.977	345.017	254.999	160.279	386.698	212.067
245027_at	31.147	31.543	28.9628	27.8446	36.2351	31.9814	23.5427	32.8003	19.2485	26.9251	31.0289	30.1179	28.5576	21.047	24.4705	21.3329	36.8634	25.4339
245028_at	80.4251	89.1672	94.2982	49.1525	60.74	51.4731	71.3491	62.893	67.9495	74.1337	89.7774	77.3217	104.497	128.465	105.932	118.182	87.2183	91.04
245029_at	14.3214	12.6023	13.1984	9.65198	12.971	14.3049	12.9104	12.9088	11.7075	9.60176	11.5063	10.7231	12.2315	15.2786	12.8601	13.256	8.40385	9.67183
245030_at	10.4743	9.63079	9.1223	7.5681	8.47387	7.41668	9.72081	9.06906	9.00817	7.86992	7.72578	7.51497	10.6851	11.2916	10.5397	8.12549	7.19049	7.08785
245031_at	8.37972	8.25061	8.4322	8.70103	8.60542	8.19993	8.4322	8.37972	8.72107	8.24993	9.62901	8.45267	6.37171	7.86313	7.78343	10.5337	10.921	8.84228
245032_at	7.93842	7.4359	8.20498	9.11331	8.64581	7.03534	7.41637	7.67422	7.66729	7.8235	9.00428	7.49477	8.60541	9.3861	11.6461	6.28979	6.20791	6.79896
245033_at	6.17814	6.10674	5.97842	11.79	7.44721	5.71335	5.87592	5.39716	6.43219	5.97449	5.8276	6.93634	6.73586	7.16925	8.3488	5.86988	5.71124	5.74559
245034_at	18.6186	17.1593	16.1996	14.633	11.5489	15.8847	17.2129	18.0389	26.9832	17.6526	22.7325	18.9987	16.7959	15.8449	17.1051	22.4514	23.2577	23.8478
245035_at	12.1639	16.5909	20.6882	140.231	87.4766	116.636	15.4167	21.6369	22.6393	153.129	134.185	126.457	11.4916	7.74962	8.61709	66.1252	42.2159	34.1476
245036_at	17.8957	18.1116	17.8341	28.3338	21.5283	35.0436	27.8721	25.5035	36.6257	30.7472	31.3995	29.0886	12.7832	13.3072	17.0735	31.2592	25.8155	31.8738
245037_at	6.90337	6.7248	6.79143	11.8055	6.83621	10.8343	7.95508	7.35056	7.12756	6.78975	6.86068	6.49992	7.48401	6.19695	7.60175	9.90299	6.77471	13.351
245038_at	14.1669	9.38398	10.7003	29.6313	19.5887	26.6828	74.3135	59.4831	62.6815	10.4395	8.45961	10.2395	3614.77	4004.4	3562.3	38.828	37.4049	31.1457
245039_at	197.026	189.882	182.323	124.626	128.04	108.541	198.26	169.467	170.879	168.884	161.768	150.72	141.104	141.754	167.337	178.118	158.206	158.401
245040_at	6.09471	6.64271	7.26799	5.85808	5.93511	7.54544	5.83742	6.25449	6.43563	6.20918	6.13011	8.91412	6.30712	6.07971	6.47434	6.15029	5.9767	6.22067
245041_at	17.8682	16.4349	17.0266	7.63366	8.61107	7.62176	33.5222	32.1539	30.3994	7.15704	9.5273	12.1844	318.838	259.986	274.535	12.8095	10.6904	16.3071
245042_at	28.8838	21.375	31.3453	25.6896	33.0729	31.4485	18.1027	26.7262	16.2583	33.5173	28.0812	29.2035	15.9454	22.386	14.5437	31.3866	28.4574	28.6274
245043_at	78.7093	87.687	79.0137	104.991	109.098	128.715	93.4844	79.6721	72.9794	148.758	150.361	162.741	78.6123	84.7687	68.8146	103.682	109.824	89.8031
245044_at	994.342	1053.85	931.091	219.404	309.444	192.806	488.428	520.196	489.613	428.582	479.797	412.823	746.228	792.709	729.258	314.945	332.931	323.441
245045_at	246.685	223.93	196.993	189.781	192.134	186.015	213.878	200.685	217.118	192.292	156.486	155.308	198.953	176.429	195.928	220.461	176.958	149.548
245046_at	760.275	687.909	756.537	467.636	497.97	464.916	771.76	761.525	802.539	504.849	652.674	528.575	740.458	713.319	606.754	720.889	638.12	586.849
245047_at	87.9829	115.108	46.98	137.821	57.8197	57.6761	243.163	277.232	391.405	33.5587	31.7562	46.0817	45.0633	66.5462	55.2833	23.9165	34.2073	22.1627
245048_at	1986.31	1881.56	1532.08	475.53	460.611	536.515	1464.04	807.466	1214.25	120.002	81.0203	384.852	1460.07	2017.36	1687.35	53.5863	105.487	37.1622
245049_at	35.7274	70.9269	31.7758	19.9948	16.8077	16.1906	103.895	62.7678	87.4425	18.1982	9.64405	20.8743	45.3195	55.1608	56.9756	14.8987	12.1934	15.2466
245050_at	893.951	1936.48	1076.96	262.514	347.078	319.704	661.581	403.245	493.602	205.313	160.602	516.894	718.318	1113.19	1080.06	145.716	335.306	225.425
245051_at	43.2311	43.2231	42.9488	93.1221	78.2113	74.7866	48.1998	48.8045	46.5937	62.5439	49.3944	59.9529	197.285	182.095	212.233	56.1392	63.9258	60.4127
245052_at	32.224	26.621	25.5685	142.136	138.252	135.364	52.954	42.7025	46.0552	75.627	53.8888	65.3865	22.8036	32.1235	22.4301	75.447	87.6439	94.5872
245053_at	6.48046	6.73697	6.54413	9.28486	6.7179	6.70687	6.65199	6.78334	7.24415	6.76887	8.41802	8.16732	7.06546	8.12049	7.07592	6.48312	7.00564	6.38166
245054_at	57.7342	55.3174	60.9987	60.7587	61.4994	65.6826	48.8958	52.6114	31.6598	50.6248	44.7663	51.7306	39.9017	30.2623	40.4437	60.6863	49.1939	50.9126
245055_at	10.533	9.64028	11.2948	17.0269	12.2695	15.2281	8.60541	9.95355	9.39246	11.0903	14.1358	12.4038	8.46048	9.94762	10.1942	16.6076	13.3163	17.4604
245056_at	10.9876	12.1609	13.0807	15.3894	16.6202	14.2932	11.8848	14.9686	14.2486	19.4424	18.9488	18.82	9.13317	12.0085	12.1215	18.1728	18.5148	15.344
245057_at	6.71597	6.53472	6.58214	6.26503	6.60462	6.25526	6.53445	6.70659	6.89204	6.43986	6.34637	6.26503	7.80809	8.31116	7.3966	6.38087	6.15332	6.29651
245058_at	4.30395	4.27734	4.26121	4.1643	4.63901	4.07261	4.38047	4.37077	5.05363	4.13634	4.12819	4.16824	4.6333	4.71741	4.68151	5.46206	4.03829	4.09072
245059_at	208.568	214.653	173.996	190.296	224.464	183.495	158.974	250.535	244.315	222.444	127.704	190.484	158.505	145.226	160.827	118.505	187.38	167.902
245060_at	924.119	1240.47	1174.23	1363.38	1216.25	1228.75	1122.03	1020.01	1085.53	1605.14	1606.92	2036.55	833.705	770.177	706.104	736.877	874.447	707.264
245061_at	923.341	1001.91	966.337	272.775	386.643	304.22	589.108	640.18	612.992	387.143	347.641	368.046	429.719	615.932	396.869	206.259	326.599	232.015
245062_at	164.097	185.969	167.007	125.737	143.291	110.967	184.933	171.231	165.067	143.306	129.825	137.915	128.019	145.548	134.928	141.466	115.127	144.75
245063_at	30.586	32.1499	31.4085	84.4958	83.3872	87.9034	35.806	42.8149	44.6836	50.0161	54.7815	48.0022	27.8469	26.241	23.5267	80.9255	68.775	71.172
245064_at	50.8311	63.7815	43.6756	105.84	91.6535	92.809	48.1404	47.0283	47.3841	69.8183	86.0775	80.0839	64.6626	62.706	81.9273	98.2342	83.0454	92.9578
245065_at	210.354	201.036	217.676	173.436	184.656	206.688	214.719	232.54	223.819	198.631	236.63	198.256	200.105	154.234	160.204	243.999	185.34	216.757
245066_at	111.979	105.86	120.498	129.772	105.677	143.813	95.953	123.591	98.4929	112.449	96.9434	115.739	106.427	106.83	119.478	98.0246	134.776	101.479
245067_at	721.6	553.87	643.159	873.531	850.027	741.172	785.949	701.391	762.919	722.742	755.062	741.537	529.618	418.346	516.586	643.674	719.662	664.482
245068_at	5.91758	5.45264	5.78206	5.3164	5.7089	5.56945	5.77256	5.93511	6.18297	5.93511	5.49898	5.61102	6.36909	6.32581	8.68247	5.43922	5.52661	5.60342
245069_at	5.91636	5.74984	5.84198	5.83119	5.85736	5.55346	5.72816	6.03492	6.111	5.73923	5.70843	5.67103	6.39557	6.52614	6.98093	5.64732	5.58779	5.51595
245070_at	9.66487	13.9363	17.426	18.4757	12.1796	16.1906	16.8848	15.0995	19.1051	21.3741	26.8936	18.8762	184.209	187.846	201.929	21.3601	43.0265	21.6343
245071_at	8.31628	7.83863	7.22335	7.23463	8.15324	9.34379	8.0653	12.0549	14.215	8.99652	7.39326	6.71845	8.46031	11.6839	9.12605	6.90025	7.62583	7.85635
245072_s_at	7.46712	7.18901	7.59145	6.76914	7.43834	6.37537	7.15601	7.41637	7.50618	6.79394	6.33413	6.30182	9.1768	10.1276	10.7841	6.68926	6.11515	6.73033
245073_at	5.37084	5.26425	5.22804	5.19721	7.57805	5.21389	5.24482	5.40714	5.47059	5.36334	5.10076	5.09951	5.98358	6.31905	5.84798	5.30375	5.22332	5.26381
245074_at	17.6765	19.7872	15.3267	23.3084	20.913	15.3301	10.8338	12.4894	13.9969	19.7045	33.4232	19.7539	14.0701	12.3959	19.885	26.3685	21.5345	31.2997
245075_at	34.4611	33.3375	34.2382	6.367	12.0065	8.27403	34.2185	30.7573	24.22	19.957	11.9005	11.0996	55.3629	28.1783	47.7681	25.0055	23.9244	28.5089
245076_at	28.8204	33.7918	23.0338	74.2007	139.018	88.3832	73.3205	62.9176	56.6151	162.45	128.856	158.795	150.501	117.049	174.572	157.347	150.179	208.384
245077_at	6.73392	6.65828	6.9669	6.14196	6.64435	6.47008	6.73088	7.16866	7.11205	6.30687	7.09309	7.4616	7.81836	10.6441	7.93354	6.95832	5.72228	6.45787
245078_at	73.0949	70.7407	75.5074	142.692	106.691	139.436	87.4335	103.548	71.8934	153.87	135.339	212.752	53.7594	39.1475	40.4978	115	136.831	101.381
245079_at	17.0238	11.5974	13.2941	21.2795	20.7529	23.7716	17.0826	15.1953	11.0099	18.9037	26.6232	17.7858	11.4879	11.1142	12.2763	25.4094	17.2604	29.3189
245080_at	37.6207	47.6946	46.3817	26.8822	19.7822	28.4128	48.9983	36.6423	38.5222	36.0477	26.667	25.5785	40.7498	27.0731	28.165	19.2277	26.0346	26.2437
245081_at	8.04578	11.2358	7.93028	9.37069	7.98848	7.08348	8.48885	7.50094	7.9456	7.07476	6.94861	7.83058	9.06887	10.869	12.0594	8.95228	7.73086	6.87705
245082_at	13.0418	13.8323	12.3433	24.0495	26.3068	31.3511	21.0526	16.3373	27.6974	19.2043	21.214	18.5179	310.909	248.776	292.306	18.3377	18.6507	20.6789
245083_at	180.623	173.461	176.857	168.554	172.286	167.364	217.515	218.801	237.068	157.182	223.562	175.741	133.585	120.885	163.327	100.584	155.42	128.14
245084_at	97.5746	106.392	88.8144	97.5906	94.2807	97.4784	66.2788	80.0411	105.703	86.9589	97.2146	105.417	124.457	98.3553	118.495	134.46	93.2637	115.606
245085_at	514.384	614.113	615.427	1471.54	1299.97	1689.92	701.247	740.929	676.254	853.596	754.69	837.412	385.271	389.216	396.901	726.224	1015.92	966.119
245086_at	8.84882	7.90264	8.75193	11.4408	8.97695	8.83175	8.70318	9.41971	8.96148	7.69601	8.67035	8.3904	9.17303	9.25326	8.66643	8.77966	7.9888	8.93832
245087_at	14.0863	12.7125	16.6243	12.5074	12.788	12.3786	15.5304	12.788	18.7614	12.6355	12.8027	10.7584	12.5914	13.25	12.8897	9.11518	12.3786	12.4296
245088_at	10.9862	11.6107	10.5709	10.3305	10.6616	10.7735	10.5709	10.9492	12.6194	10.5588	9.01946	8.40212	14.9281	11.8751	11.7393	10.8409	10.9889	10.2124
245089_at	161.217	166.084	166.07	172.035	183.382	196.84	175.187	191.457	227.471	180.868	219.675	181.374	122.933	156.615	142.35	228.934	152.871	202.873
245090_at	251.742	311.203	314.028	43.5171	66.3034	53.9042	333.328	374.882	296.089	88.2653	90.9895	79.445	167.347	237.995	161.887	80.5723	68.8146	83.8269
245091_at	6.01957	5.97032	5.99982	6.83312	6.26272	5.78182	6.14852	6.43695	6.6813	8.58882	7.04778	5.90883	6.85167	6.98352	7.62614	6.0892	7.15542	5.8209
245092_at	43.4385	54.2218	44.592	65.2469	69.5763	65.081	47.8231	37.6694	35.1676	51.0488	48.2018	52.2195	46.7375	35.0177	45.5173	66.4342	58.6016	57.7603
245093_at	41.9135	49.3944	39.7209	28.4014	49.2728	45.0541	50.1344	50.1303	53.5093	39.9993	32.9603	51.9755	39.5809	41.2474	38.6331	34.8025	36.1489	34.3198
245094_at	217.529	259.096	272.529	263.832	217.703	257.473	278.647	243.038	194.054	158.648	170.445	162.901	173.311	175.604	139.978	185.37	170.529	158.89
245095_at	15.339	7.91433	12.3873	12.2089	10.8485	12.9258	12.5141	14.1809	16.612	13.1551	8.72752	11.1135	9.68574	9.75923	10.5686	6.46743	11.2516	11.3911
245096_at	153.791	130.039	133.876	107.95	94.3273	90.8365	88.3125	84.9256	108.154	113.498	92.8357	118.783	113.284	128.933	146.118	159.001	113.191	89.805
245097_at	40.1161	41.7588	40.5485	40.2498	30.5898	39.1668	42.029	52.3742	44.4092	47.9943	47.502	39.6785	37.1836	36.9719	39.0463	44.816	41.5433	41.9101
245098_at	463.087	438.808	527.794	252.674	247.172	306.685	492.983	402.393	420.577	277.528	221.797	285.155	341.702	435.844	363.942	264.744	367.865	339.185
245099_at	181.329	145.956	150.386	116.65	103.495	99.8041	110.077	99.1218	116.665	95.701	104.186	112.713	136.346	114.18	125.824	79.7163	117.159	98.2422
245100_at	63.5018	72.4373	61.0564	56.7211	61.9151	62.0271	62.8995	68.4116	49.6793	65.6017	62.9745	62.1904	62.1598	71.8447	66.7982	59.3258	78.3978	63.0677
245101_at	1066.09	951.546	1111.57	947.957	879.092	904.588	1158.08	1389.9	1330.24	1053.77	933.965	856.423	1096.69	912.951	1129.61	935.885	972.889	931.857
245102_at	7.74611	6.89487	7.1065	6.20536	6.89487	9.3888	7.18104	7.84506	7.53645	7.20586	7.61925	6.17155	8.6996	9.25098	10.5714	7.14749	7.86087	6.53741
245103_at	5.01413	4.71257	4.73236	4.74462	4.68478	5.6177	4.78062	4.88885	5.17782	4.73722	4.88283	4.58219	5.34662	5.47284	5.41537	4.656	4.504	4.60957
245104_at	33.9943	40.4637	29.8463	51.1957	52.7629	62.0399	39.3361	41.8224	36.981	39.3604	38.2227	35.2341	29.0718	30.8903	31.7027	45.4351	48.7113	53.8754
245105_at	7.69063	7.95736	6.50446	7.95736	7.9829	9.75642	7.34603	9.91642	8.0779	10.018	7.74262	7.82704	7.82897	6.68377	8.74798	8.13651	9.2681	10.7364
245106_at	98.6182	100.594	94.7233	609.752	378.775	543.48	105.089	83.4557	92.6262	200.743	225.392	185.469	78.6075	65.089	87.2093	400.883	288.489	304.952
245107_at	8.57155	8.22996	8.22996	7.28712	6.33933	7.29971	8.72501	8.77317	8.75877	8.21442	9.10508	7.41759	12.0366	10.8463	13.5711	7.60924	7.05328	7.46282
245108_at	4.59199	4.59067	4.57862	4.61999	4.5886	4.46311	4.58351	4.76611	4.78946	4.35517	4.5378	4.38569	5.01908	4.96535	4.86441	4.46146	4.45505	4.50363
245109_at	16.8367	19.0393	21.2236	18.6369	24.8254	25.0652	13.2516	20.8298	14.7489	17.6301	12.9774	22.1045	20.0495	11.4417	19.0753	19.9324	27.121	24.4861
245110_at	18.776	17.6606	18.0004	18.131	18.8587	25.0343	15.8938	14.7295	12.4382	20.163	24.9942	16.4457	19.4712	19.9112	20.5122	17.098	18.8541	16.7587
245111_at	8.91192	8.61461	8.42736	8.12582	7.41181	8.05471	10.9272	9.06403	9.1298	9.7276	8.29172	7.39721	10.011	10.7108	9.97607	7.9505	7.8309	8.5084
245112_at	470.14	473.104	446.26	243.859	246.533	209.444	474.427	398.183	415.085	277.722	238.039	269.44	572.915	530.947	468.675	277.129	301.638	270.049
245113_at	66.1021	86.258	88.676	33.0199	31.2297	40.5685	96.2016	98.7622	112.306	40.8629	19.6398	54.253	64.1072	80.5326	59.5113	13.8989	46.3684	26.5435
245114_at	239.889	247.761	280.692	308.809	342.095	384.125	334.123	267.895	244.154	295.166	415.375	356.411	338.183	335.499	287.957	367.019	289.855	328.3
245115_at	610.905	633.601	642.143	459.298	500.677	503.482	594.321	648.185	730.008	592.128	545.561	608.101	465.872	510.27	534.294	509.097	538.835	566.41
245116_at	113.286	125.064	146.144	174.325	155.263	170.553	82.8869	99.2808	108.611	133.232	176.092	174.178	99.1015	108.221	92.8223	126.584	143.432	145.545
245117_at	86.1271	105.089	112.375	85.9716	119.056	89.9971	109.163	91.5143	108.55	119.861	127.626	128.594	61.8338	54.9415	43.9004	122.037	111.924	99.7079
245118_at	161.27	154.386	189.298	161.861	143.955	138.354	122.333	133.953	120.855	131.484	176.233	134.306	95.9963	118.204	93.4363	138.332	121.772	125.098
245119_at	17.1709	20.0717	24.3407	20.7704	18.4768	19.8161	25.762	17.4554	23.5127	30.4212	24.2255	18.8816	52.8312	36.8082	56.3333	26.4135	19.2797	26.621
245120_at	27.3908	43.2071	36.0881	58.6714	63.1428	67.0015	28.4487	33.4603	28.2501	52.7033	54.2263	57.6892	29.1406	36.0629	36.031	72.0516	66.1551	53.7516
245121_at	1830.25	1644.59	1765.56	2813.86	2668.14	2382.95	2291.79	2150.6	2400.24	1457.49	1325.72	1392.93	1060.37	1338.52	1216.9	1283.36	1713.55	1643.4
245122_at	276.617	248.22	228.99	513.55	367.14	464.572	234.501	279.025	277.71	359.705	338.99	419.611	212.076	199.895	227.939	247.619	281.038	273.465
245123_at	221.314	211.163	245.169	42.7675	53.0084	58.5847	98.3836	122.958	95.1367	84.3866	82.0132	107.72	82.9602	77.4886	58.7752	40.7657	56.678	40.5585
245124_at	214.671	202.407	222.582	238.877	239.378	232.841	224.362	233.253	261.191	188.352	152.376	145.071	170.788	133.816	138.998	233.944	167.062	210.203
245125_at	8.32004	7.91596	8.1315	7.56872	7.42217	6.75082	9.08901	8.93942	8.36665	7.46957	7.59987	6.95317	11.5874	11.3239	8.30092	7.67013	7.33608	6.85139
245126_at	45.8212	43.7842	41.2508	10.6337	10.8811	8.83174	80.0609	54.2976	64.4902	9.32078	8.17269	7.25487	31.5624	41.8731	42.2905	8.45718	8.3303	11.4096
245127_at	205.144	245.18	220.045	164.874	172.672	145.974	211.58	265.823	259.096	225.657	243.054	192.822	203.968	162.047	184.788	149.917	198.929	171.759
245128_at	10.172	9.4168	9.55474	8.07044	8.66946	7.9639	9.45013	10.5631	9.38784	9.01113	8.71427	7.78903	13.8581	15.1265	12.3507	7.14412	7.69237	7.93892
245129_at	5.31116	5.2623	5.14792	5.03043	6.04658	4.77552	5.14453	5.38232	5.46251	5.00529	5.07027	4.87541	5.63342	6.81882	6.97434	4.93587	4.70078	4.96964
245130_at	14.7452	13.5566	19.4676	9.96153	11.7477	9.93701	16.1438	16.1873	14.9253	9.523	8.97806	10.7584	11.934	10.2454	11.9792	8.40696	10.2233	9.45731
245131_s_at	196.057	191.724	212.94	201.032	202.898	245.27	171.343	200.282	214.072	289.617	292.727	310.017	157.451	223.943	173.141	270.783	219.892	317.974
245132_at	36.965	31.5209	33.9999	41.3738	37.5774	41.904	33.5063	42.4358	39.0183	36.0414	43.7923	34.2431	32.7128	24.3662	22.185	43.5841	34.5568	40.0215
245133_at	32.809	23.838	30.2362	41.7383	25.1126	31.108	24.0544	20.4147	30.7106	22.7139	17.5449	16.6366	26.6779	23.5364	22.8956	22.8561	26.6472	29.6849
245134_s_at	93.7787	111.979	122.63	97.924	78.2402	97.4145	98.7521	81.7592	92.6186	82.7118	80.6617	93.0648	81.3872	91.4429	97.5386	56.3727	84.8976	63.813
245135_at	6.02081	5.89429	5.94877	7.70265	5.90374	5.5223	5.91248	6.13188	6.06399	5.88147	5.76901	7.06633	7.31111	7.24802	7.55319	5.82042	5.51549	5.75812
245136_at	106.589	130.475	87.6294	68.3975	58.8174	56.1473	104.733	70.7276	79.8885	124.629	147.835	122.653	83.2777	91.7496	81.4642	96.6472	82.4523	100.642
245137_at	11.7166	9.52398	11.3995	17.2696	15.2116	11.823	13.8175	12.0703	9.99945	16.9067	12.11	16.7966	15.6965	11.1879	10.234	19.9496	13.8005	11.7958
245138_at	94.3059	89.4571	94.3059	190.331	195.803	203.24	104.613	102.891	115.395	111.756	93.8075	104	64.0283	53.9962	70.1432	75.4315	93.9733	69.6722
245139_at	158.909	191.142	175.05	261.824	232.191	220.86	157.257	148.288	178.749	203.859	163.156	227.322	111.563	147.95	122.691	189.547	221.223	190.883
245140_at	11.8544	11.1944	7.60518	17.7507	12.3471	10.6387	7.05068	7.46191	11.1861	15.5908	11.0215	12.5316	8.81616	9.75842	8.65967	6.58187	7.62724	8.84373
245141_at	247.131	253.975	282.567	220.489	309.61	256.291	214.015	262.697	222.92	353.277	377.664	441.52	156.127	142.983	159.06	424.465	311.165	334.879
245142_at	29.011	25.991	26.0498	36.8384	21.8428	27.5975	26.4401	26.8141	28.042	24.944	18.3197	21.0777	26.5958	29.1627	24.4038	29.1268	28.4317	30.8383
245143_at	27.2069	32.6249	31.6468	27.9489	34.6328	22.1145	33.4953	29.4916	28.3652	31.8568	29.9802	32.1196	40.7556	34.0908	30.9462	36.1074	27.7795	30.352
245144_at	145.782	153.784	153.873	245.008	165.07	210.479	153.668	182.353	169.196	164.88	213.067	149.165	176.704	151.726	161.635	208.038	176.769	189.532
245145_at	142.918	137.003	128.922	239.142	223.406	171.632	132.193	122.128	120.058	117.174	90.8364	130.805	123.54	114.152	123.845	110.353	121.905	122.102
245146_at	123.759	121.96	109.547	229.555	175.356	177.199	120.587	123.082	145.489	161.333	138.582	142.23	94.7388	88.6905	89.973	181.188	140.768	151.104
245147_at	17.2682	16.5844	16.492	26.8626	35.7994	24.2509	16.492	13.8334	14.6009	17.7493	17.8546	14.2252	15.2238	13.4534	8.35171	16.3547	19.3484	18.4564
245148_at	219.332	245.129	224.04	625.918	467.003	640.483	419.663	399.675	395.023	548.437	492.255	416.195	259.97	268.104	263.053	443.41	519.342	603.027
245149_at	28.5558	30.5571	28.106	40.5302	37.2172	49.3397	28.7046	26.8919	31.5177	38.0676	33.2281	36.335	28.0599	27.6548	28.2914	54.6242	42.2784	46.4427
245150_at	100.865	90.1339	112.629	102.486	137.878	104.935	113.703	117.116	114.007	67.1338	46.3732	73.1219	51.7923	50.0994	46.2182	42.2784	79.6181	67.4101
245151_at	12.3385	18.0285	16.7511	43.3939	31.3029	47.0959	24.1178	26.514	29.0874	29.7728	33.2964	35.0522	14.642	11.3332	16.2703	32.8036	26.0167	32.4738
245152_at	130.507	155.688	159.275	67.3064	60.191	64.5234	117.944	168.61	125.745	76.7725	74.5214	65.2269	125.44	159.763	143.456	102.83	76.7994	112.777
245153_at	17.555	12.9351	16.1041	15.564	12.0092	12.0693	15.8886	16.1793	17.4428	13.5405	22.6208	14.851	22.5188	23.6858	19.4928	16.6667	11.7484	14.1611
245154_at	4.65237	4.44135	4.73605	4.22513	4.33109	4.10553	5.11798	4.33109	4.38768	4.28613	4.21386	4.14417	4.58935	4.91079	4.95537	4.30555	3.90005	4.17184
245155_at	748.7	722.846	777.791	899.512	748.807	822.463	787.161	820.034	846.63	831.636	948.736	912.613	527.382	551.963	579.793	760.088	714.58	701.506
245156_at	64.436	65.9733	77.1424	69.2285	70.873	85.6825	70.6811	58.0303	61.2876	73.083	97.5987	100.464	128.98	132.926	106.027	115.153	92.1613	90.5849
245157_at	8.10316	7.62458	7.85603	7.50648	7.54048	7.36961	7.95409	8.20229	8.32038	7.43223	7.51636	8.12182	9.60018	9.52515	9.39767	6.66074	9.19906	7.51204
245158_at	16.7587	15.6271	13.4115	15.7133	16.4883	17.7354	16.5331	16.9986	28.7725	17.1065	13.9595	16.0407	19.0112	19.1617	19.1444	16.2129	14.8406	16.0407
245159_at	5.07235	4.85782	4.88724	4.82105	4.87121	4.5886	4.86801	4.98784	5.06464	4.81096	4.85922	4.58596	5.67196	5.9001	5.6708	4.79517	4.48904	4.72556
245160_at	16.6114	12.2476	12.1894	11.0623	12.0164	9.58324	12.4311	12.8834	13.9521	18.783	11.7479	11.5167	14.2721	14.251	17.5348	9.16436	10.9817	10.9196
245161_at	26.3772	26.4194	18.7321	26.9688	25.1312	26.796	22.9295	19.0816	27.8852	27.189	27.8675	36.1103	145.758	130.413	154.614	29.1053	46.5784	26.9195
245162_at	4.65543	4.53016	4.66232	4.49975	4.5391	4.27172	4.49975	4.60767	4.72013	4.45505	4.60143	4.35857	4.97331	5.15892	5.72216	4.49015	4.44902	4.31972
245163_at	14.3043	13.5845	12.3375	13.867	14.0597	11.9249	13.9446	14.4152	14.5342	13.9676	15.7527	15.0747	14.7701	15.8254	14.7701	12.5935	15.1362	13.792
245164_at	292.186	241.958	303.34	883.618	786.271	1017.23	362.74	460.961	393.427	584.083	361.453	473.425	160.972	230.169	146.388	539.721	708.412	580.09
245165_at	103.155	118.058	105.162	55.016	51.8902	45.3158	75.5089	59.1311	65.3166	48.0032	43.4412	36.9931	29.2335	38.7125	34.1307	36.3275	39.8157	31.53
245166_at	26.4151	27.1935	22.3906	19.2264	22.6384	21.8177	22.1609	22.8477	22.1036	22.3906	20.0128	22.1818	20.4046	23.2348	22.9993	22.3244	22.5762	22.1381
245167_s_at	599.667	601.209	583.916	342.615	307.973	318.956	719.262	469.908	485.258	309.038	342.827	367.849	873.011	755.528	731.223	360.149	354.746	372.342
245168_at	3307.25	3292.2	3710.99	5598.19	6375.2	6054.62	4637.17	4457.95	4577.36	4087.83	3321.41	4212.36	4452	4170.18	3741.99	3187.54	4715.74	4166.07
245169_at	845.656	917.16	781.747	1097.55	856.564	945.895	1093.63	1063.16	937.078	817.747	893.657	744.177	699.88	644.839	553.393	1151.92	833.722	811.789
245170_at	6.32321	6.15307	5.95831	7.34121	7.25785	6.553	6.18043	6.34506	6.39005	6.27998	6.97635	7.17072	7.3394	6.87422	10.2443	6.10323	5.67896	6.00253
245171_at	4.32602	4.25657	4.16764	9.27152	4.33376	6.28772	4.24949	4.33982	4.33973	4.28068	4.31059	5.97547	4.63758	4.42051	4.66979	4.16764	4.20686	4.18162
245172_at	51.2778	39.6737	42.7393	85.915	66.6228	74.9927	107.142	70.6941	67.9494	48.8536	49.8776	45.3214	14.1524	13.6135	24.6213	56.9569	54.9912	64.9968
245173_at	11.7644	15.4331	13.0751	191.52	141.307	177.972	15.4002	15.745	17.2066	215.585	183.721	200.043	27.1321	24.0762	18.8023	92.5786	92.8395	106.186
245174_at	20.4676	22.8111	23.1638	18.1448	19.0929	18.7394	19.3015	17.73	16.6938	20.0915	23.426	17.8806	10.3616	11.9423	9.94947	36.9187	27.8703	24.5465
245175_at	1535.2	1363.91	1678.02	1233.05	1216.15	1240.75	1997.81	2054.61	1812.15	999.667	874.842	946.284	1206.6	1280.73	1217.85	1448.24	1242.82	1353.28
245176_at	459.524	470.991	454.895	229.093	297.302	233.554	427.571	425.146	348.514	255.266	268.165	270.677	232.798	259.155	291.461	265.577	314.377	273.045
245177_at	4.99092	4.89026	4.87782	4.69576	4.77257	4.70252	4.88383	5.06028	5.1037	4.81451	5.06381	4.61222	5.56671	5.73852	5.69835	4.61222	4.67421	4.65122
245178_at	213.028	183.036	195.309	224.824	180.319	236.358	206.276	211.476	198.61	378.798	295.445	349.668	283.904	200.825	170.06	400.25	256.997	272.837
245179_at	29.3442	33.4143	32.4085	29.9334	24.5385	24.462	23.6537	19.3428	15.2372	35.6431	28.9515	31.6611	29.2359	22.7484	20.1705	31.5637	32.8373	41.0227
245180_at	78.2724	72.9585	66.7173	147.199	154.586	136.125	72.0501	89.1764	85.554	119.716	128.906	127.885	69.9561	58.2692	80.1744	141.301	111.712	107.166
245181_at	12.2935	13.7804	13.441	18.0864	14.6905	19.6306	30.2406	18.4253	17.167	9.65991	14.2197	11.6835	349.166	353.357	352.342	23.9952	12.7071	16.1269
245182_at	35.7884	34.7811	38.6871	27.5284	33.8272	45.3009	37.1606	44.006	29.4686	36.1489	45.8815	37.6183	25.8112	39.3862	32.3088	29.5134	42.0757	54.8919
245183_at	19.93	27.1076	28.4352	24.7191	30.6445	25.91	20.0178	21.2201	20.0944	36.1489	42.1033	32.1856	16.3816	11.2807	13.9802	31.2002	37.3627	27.9719
245184_at	8.44191	8.20178	8.16748	7.93826	8.29155	7.48647	8.29155	8.7701	8.65398	7.92181	8.3935	8.39195	9.7424	11.0312	10.2151	9.53298	7.96832	7.8578
245185_at	34.9243	35.6549	42.1414	79.432	84.4108	64.1547	47.884	40.1326	44.073	56.7327	55.3061	46.2752	63.8785	28.2165	49.37	49.5163	62.1011	53.2287
245186_at	7.36204	9.02799	7.89972	5.74347	5.9615	6.69008	6.82779	6.95346	15.6785	10.7978	10.4496	10.4724	7.58179	7.92344	7.63429	9.736	7.28383	10.4836
245187_s_at	177.928	169.217	154.621	328.219	260.291	326.257	155.506	131.128	122.223	212.355	192.095	273.095	135.386	184.644	141.795	214.336	248.393	242.784
245188_at	42.3201	48.178	68.302	47.8526	56.3471	52.4021	60.2219	62.1521	56.7839	57.6844	41.3764	47.4649	44.7259	45.1987	39.8238	41.0125	39.1781	47.3695
245189_at	14.3957	12.9897	13.2587	12.8322	10.9398	8.461	13.1675	14.8266	12.9742	10.7315	11.3058	9.40462	22.8749	23.2348	22.3758	9.98345	11.6868	9.63454
245190_at	8.07325	8.97732	9.85672	8.30433	8.62027	8.25569	8.39936	11.5826	8.03092	7.68242	8.34708	9.28486	6.9449	7.95638	8.41179	7.75025	7.88901	8.62027
245191_at	4.54377	4.56079	4.49236	4.48296	4.55423	5.70796	4.45853	4.57881	4.67094	4.5378	4.39164	4.33857	4.78828	4.89951	4.89227	6.39872	4.39688	4.4514
245192_at	14.3916	12.5713	10.9124	8.63445	9.18396	8.90076	11.3225	16.7133	11.356	9.24452	8.97603	7.99997	17.8546	18.0801	18.9519	9.4978	7.72451	8.88049
245193_at	234.829	209.763	199.407	197.082	245.421	223.076	198.243	202.282	190.335	213.361	219.274	222.636	661.174	729.138	832.183	132.09	151.939	92.1253
245194_at	14.8962	15.5979	15.5416	24.3747	24.0821	25.99	15.5416	17.2831	15.4319	34.8068	38.4258	33.0403	18.4799	25.7667	19.9874	19.4972	22.503	21.7479
245195_at	715.916	742.193	728.659	146.205	204.446	137.4	325.213	374.758	404.273	171.252	164.319	202.94	292.096	326.767	270.783	101.712	133.046	86.0316
245196_at	435.843	431.674	475.813	516.554	577.76	444.961	328.516	342.187	343.842	912.051	938.811	993.731	345.144	293.775	296.284	432.206	425.722	421.615
245197_at	63.4914	50.1086	55.4095	64.6666	54.5984	53.9497	84.9098	72.2279	77.4011	74.9881	61.4893	62.8181	169.12	166.316	210.769	63.1026	66.2993	64.9515
245198_at	236.553	182.716	279.507	101.358	118.34	112.671	122.62	123.54	127.626	86.1341	88.5958	110.739	94.9531	97.9762	64.7424	83.8595	95.6695	67.0318
245199_at	2263.67	2339.3	2358.99	2143.5	1949.61	2115.16	2440.6	2515.93	2593.16	2020.71	2353.18	2050.48	2985.27	2535.43	2597.84	2067.74	2273.37	2409.72
245200_at	32.6799	39.1668	36.7659	48.8105	30.7037	34.3199	43.9356	50.3749	47.3053	28.4002	26.1871	32.1315	48.2255	53.7727	78.4978	38.4692	35.5576	35.0169
245201_at	41.991	49.3133	45.0522	18.7321	32.2796	25.9803	29.5377	50.3904	33.2213	20.6246	20.2094	17.042	37.2019	35.7825	36.0392	23.7833	33.647	28.3303
245202_at	26.8301	20.5434	32.2101	24.1316	23.5538	39.4105	24.0965	18.7737	18.8618	30.6797	36.4351	26.2874	18.6224	19.4336	19.3603	26.3728	34.5781	36.3559
245203_at	5.81015	5.77731	5.73192	5.8049	5.77399	5.50395	5.7258	6.14448	5.89187	5.65614	5.48409	5.71781	7.47325	7.27815	7.34483	5.62186	5.38055	5.23922
245204_at	5.99563	6.86322	5.90325	5.99563	5.7949	5.51029	6.03938	6.09221	6.22067	6.00302	6.95318	5.19721	6.91842	7.17426	6.70191	5.92853	5.55027	5.64871
245205_at	4.38119	4.31653	4.29459	4.22547	4.33696	4.1799	4.29901	4.41697	4.46091	4.31316	4.14417	4.4286	4.68112	5.09114	4.81096	4.23207	4.07194	4.17681
245206_at	121.642	94.2768	131.592	149.745	141.423	120.063	133.475	137.652	147.462	178.587	122.042	178.514	118.905	100.582	83.8889	131.117	136.862	179.05
245207_at	223.7	188.972	214.344	302.717	279.255	307.796	250.524	240.077	212.172	342.095	166.671	297.54	217.439	224.805	237.839	76.4546	280.911	165.559
245208_at	22.6338	22.755	22.7213	31.222	22.2576	28.019	22.6579	19.7482	16.1518	22.9606	22.7297	25.7286	22.1181	19.5064	20.758	22.843	21.5788	22.0049
245209_at	13.8419	16.1412	11.8726	10.041	9.3388	9.15571	20.7691	14.0695	17.6185	11.4518	9.93273	11.1675	128.04	83.1546	154.418	11.2726	13.3242	13.3774
245210_at	38.6014	33.6401	41.3407	30.7169	29.6374	35.5598	23.4274	39.703	40.4537	38.0441	58.4213	34.9817	25.7392	38.185	22.9229	41.3084	37.9973	43.7483
245211_at	239.112	237.966	262.459	224.99	247.914	217.109	266.501	278.27	253.766	241.878	239.899	254.748	179.536	182.3	214.115	219.729	258.819	247.71
245212_at	9.24566	9.1817	9.9687	10.0882	13.9877	7.57774	8.4426	8.53571	17.1614	10.4948	10.1522	9.16964	11.5926	11.791	13.2429	8.24248	11.2909	12.0223
245213_at	2534.39	2284.41	2564.55	164.151	263.616	240.087	1382.61	1718.06	1919.1	256.944	309.724	351.786	1177.56	1287.13	1018.69	234.593	238.044	221.915
245214_at	9.39729	10.6485	9.18057	8.5515	9.16437	8.73326	9.33113	9.86563	9.74961	9.0726	8.09086	7.73467	11.9137	15.1393	15.6059	8.30365	8.63374	8.80965
245215_at	82.773	74.756	67.6237	39.0913	34.764	24.9604	54.4584	71.3946	38.5998	34.5178	34.3199	34.1511	22.9474	29.1765	17.3742	25.2896	29.5195	18.0048
245216_at	218.99	225.258	242.236	260.697	291.755	319.493	283.147	289.653	364.091	278.773	142.754	276.981	224.123	200.38	247.019	40.2564	291.695	221.596
245217_at	11.5993	11.2105	12.0268	9.99412	10.9592	10.6538	11.1499	13.8732	12.2708	11.2105	10.0336	9.16211	16.9442	12.37	12.3233	9.46742	10.1982	9.96951
245218_s_at	73.5951	84.6	107.915	15.6891	26.0509	23.5084	42.5537	28.5417	25.1467	27.3796	26.8318	27.9925	67.3686	71.0639	43.2897	32.5473	27.9856	26.6746
245219_at	303.695	305.522	291.449	52.1948	79.7998	79.3422	133.341	180.345	121.539	104.051	130.384	111.22	233.008	209.664	163.233	119.318	92.9501	101.011
245220_at	20.1494	17.5965	18.0356	10.8845	14.3942	16.7357	23.8067	21.124	35.9335	12.3758	16.8661	13.7368	29.0772	28.6922	30.011	13.8667	10.5733	11.0493
245221_s_at	3.96319	3.88023	3.86576	3.69451	3.81104	3.70713	3.84675	3.95246	4.06609	3.7987	3.84232	3.69922	4.36861	4.26488	4.4556	3.75865	3.78903	3.85561
245222_at	4.98231	4.89971	4.72304	4.73936	4.90595	5.02899	4.85782	5.0609	5.12871	4.82203	4.83294	4.77297	5.54662	5.89429	5.82282	4.80938	4.71218	4.77552
245223_at	5.03746	4.97556	4.97188	4.88323	4.96046	4.72226	4.94683	5.10454	5.00611	4.92918	4.83036	4.7575	5.47576	5.90447	5.86362	4.77414	4.66442	4.76122
245224_at	11.2756	9.05324	9.07558	9.07297	9.46042	10.2221	9.59663	10.3081	13.1756	9.1283	9.62268	8.96479	13.6522	16.4579	12.0549	9.26962	8.90753	8.83102
245225_at	6.78696	7.02264	7.03303	6.17941	7.60518	6.00401	6.64653	6.81854	7.05039	6.48898	6.22425	6.72204	7.82222	8.27641	8.08388	6.34454	6.3435	6.14196
245226_at	250.993	271.367	231.706	1384.75	1385.74	1283.81	418.561	373.299	412.73	1184.6	1359.33	1156.61	509.924	495.47	419.387	1118.83	705.089	842.571
245227_s_at	14.2782	18.3242	14.7892	69.2911	59.6789	73.8418	21.7072	27.5828	20.2897	46.6741	20.4264	33.0396	27.8663	17.6834	33.1647	14.94	47.0119	34.6264
245228_at	80.2024	70.9501	82.9601	92.7404	74.4831	90.583	106.878	129.681	118.885	100.537	110.685	93.8787	99.244	100.429	103.448	153.93	98.8251	123.186
245229_at	249.328	293.13	212.984	63.6873	74.7836	61.5145	218.182	209.926	189.501	92.5254	75.8681	114.768	265.921	237.18	297.058	87.0161	100.897	91.259
245230_at	25.5738	33.9058	31.0385	47.6545	38.9622	46.0259	30.9773	24.2016	29.7587	34.7804	29.899	35.4242	33.8501	39.3887	30.3962	38.599	38.2455	38.2824
245231_at	13.8345	11.5404	13.9349	14.5312	15.1076	14.4265	13.9349	11.8829	14.0107	21.9552	13.5756	15.373	11.1215	9.06925	13.6483	14.0228	13.6662	14.683
245232_at	8.40282	8.47492	8.46657	7.74007	8.11115	7.60643	10.0114	8.96921	9.99494	8.01313	7.65533	7.32554	10.4106	12.3751	10.5988	7.98487	7.18134	7.74007
245233_at	6.158	6.17003	6.15168	5.99071	6.22604	5.97375	6.0436	6.25732	6.33075	6.15585	6.15585	6.11452	18.112	28.3792	35.4912	14.5976	7.69348	6.08645
245234_at	5.45287	5.81302	5.33631	5.56602	5.35828	5.1568	5.30549	5.49198	5.53138	5.31444	5.888	5.68246	5.77565	4.86881	4.3059	7.20675	6.14196	5.21303
245235_at	133.363	141.722	128.204	245.426	183.069	210.773	164.63	165.712	156.56	127.691	114.422	142.151	99.8965	92.08	96.3973	81.057	157.337	106.038
245236_at	12.2134	9.90665	9.85227	10.1505	13.6707	11.1948	9.61636	9.89851	10.2679	10.1255	9.37454	9.55965	13.1108	12.3152	10.979	9.25782	9.43016	9.68932
245237_at	27.1054	34.3213	26.5478	14.2633	21.7783	21.9372	24.1882	24.9604	24.2898	27.111	22.8139	30.1767	30.6804	29.7276	31.1579	42.1051	25.5486	33.0566
245238_at	1066.2	1012.64	1041.48	540.708	470.478	484.959	818.334	1196.48	1227.74	753.76	676.907	779.358	837.412	768.801	1081.15	605.471	724.257	663.472
245239_at	4.86701	4.85104	5.10999	6.38481	6.7736	5.01887	5.10999	5.05218	4.92574	5.06402	5.72769	6.22834	5.31509	5.77731	5.38387	5.02259	7.33578	5.05695
245240_at	4.04394	4.03896	3.96205	3.90101	3.93028	3.83428	3.95328	4.05059	4.56941	3.97412	4.01712	3.88693	4.18454	4.68805	4.65199	3.89973	3.86655	3.90871
245241_at	6.64435	6.68322	6.25295	6.54413	6.71514	6.07821	6.67334	7.0042	7.30511	6.65965	6.54413	6.23116	8.57366	8.71033	7.99931	6.32295	5.96346	5.93316
245242_at	341.856	314.984	337.933	12.2657	22.0646	12.8908	169.509	111.965	127.662	16.9693	17.1234	14.9846	99.7673	118.644	113	16.2917	16.1259	18.8324
245243_at	11.0659	11.7426	11.1517	12.1359	11.6873	13.0818	11.7253	11.9632	7.47602	11.6907	12.4408	11.3556	14.8345	12.7104	15.7864	12.9157	14.1797	11.2798
245244_at	129.458	123.09	138.207	69.257	74.9127	86.074	122.098	126.8	108.443	173.041	138.457	173.268	155.053	125.535	127.453	99.9724	132.492	106.641
245245_at	5.97621	5.86145	6.74832	8.91668	7.79623	7.12434	5.65149	7.54916	7.12434	8.41041	9.57261	7.04981	7.40602	7.20497	6.52855	7.06488	6.94632	7.30241
245246_at	4.19969	4.11972	4.09475	3.92706	4.11093	4.20833	3.95458	4.20936	4.37903	4.07194	5.29157	3.8847	4.74072	4.51456	4.83513	5.28852	3.80385	3.90325
245247_at	134.549	139.651	140.375	188.848	178.243	196.299	138.764	160.86	139.255	229.037	155.5	209.221	178.558	206.514	209.823	151.223	203.591	189.003
245248_at	47.1579	79.5332	73.9739	74.5597	64.6016	85.1876	74.193	56.0977	76.8514	64.7237	68.5804	73.6253	48.6953	47.8762	56.5675	67.916	73.6465	67.3409
245249_at	1072.72	1052.47	1119.36	605.758	742.741	655.791	1037.91	1080.33	1074.75	415.323	571.598	588.031	1729.24	1918.16	1659.31	710.248	613.975	613.042
245250_at	21.8087	32.4811	25.9782	31.591	21.5239	29.2636	42.8132	49.3934	46.7481	40.5153	32.1526	49.2667	345.889	360.046	360.164	24.0076	31.1323	32.5901
245251_at	42.9453	27.2516	25.7075	120.567	121.952	146.972	33.5587	33.0797	37.1637	145.512	144.251	123.457	91.8835	119.1	120.508	116.655	158.154	120.419
245252_at	54.3936	51.652	45.4977	49.7835	50.9367	41.1484	52.6903	33.6823	42.7157	53.0181	59.444	83.4284	196.198	312.414	176.44	80.6285	73.152	73.9375
245253_at	5.75977	5.95562	7.48555	5.95195	6.07122	5.93754	5.63064	5.89429	5.86675	6.09872	5.47014	6.05329	6.17231	5.98579	6.45018	6.14347	5.82401	5.88364
245254_at	35.9224	37.1332	33.5077	36.7206	37.3351	41.3135	56.4352	68.2432	55.0319	24.6618	27.0059	22.1177	170.116	117.03	136.508	24.6354	34.2424	30.2549
245255_at	161.701	154.335	146.852	393.468	302.569	368.666	191.252	227.135	214.591	249.17	222.829	212.73	116.919	147.929	166.145	258.119	256.186	250.411
245256_at	26.8853	30.1141	34.9092	40.6586	36.9749	43.4055	22.6705	31.4653	28.2507	33.7793	55.3845	45.3689	22.7456	32.4505	39.17	65.0342	41.1636	45.4547
245257_at	10.3187	8.75661	9.30396	7.51605	8.10782	9.00022	13.0346	9.11481	9.95888	10.9151	11.4365	10.2967	11.3897	13.1097	12.4526	17.0995	10.5727	13.6175
245258_at	52.8399	55.6662	50.4826	12.9905	18.7479	17.5409	66.9231	55.4733	52.6643	17.5222	13.5113	20.6606	39.1371	31.8287	30.6986	50.317	35.5328	46.6981
245259_at	18.5468	12.4076	17.2788	18.1117	18.4776	18.4807	19.3206	20.5502	17.9642	15.0314	20.0655	15.3131	22.3382	20.2718	24.092	27.71	17.1346	18.3106
245260_at	212.669	246.543	276.936	147.006	164.833	167.529	240.926	224.962	248.23	141.214	103.676	123.029	130.445	209.5	161.827	179.359	173.276	165.233
245261_at	63.4575	81.5411	70.6201	174.899	144.851	140.413	77.6862	89.0153	74.2799	194.476	292.156	223.066	76.8072	96.0436	71.4106	159.125	135.74	149.297
245262_at	90.2636	127.856	99.4869	73.8266	60.9411	65.9936	114.073	99.1096	92.8776	94.0891	85.0233	107.852	88.3341	60.9211	69.1063	42.0575	95.0994	65.0997
245263_at	43.1894	42.5764	54.7613	34.6144	53.0541	44.4457	37.8509	38.5729	32.1103	36.6445	36.6122	37.3873	17.4285	20.6221	12.7801	37.3873	36.7236	37.1912
245264_at	20.1485	20.9031	20.364	4.55339	5.40303	4.54004	10.6431	9.27552	7.99915	6.20039	4.60011	5.97228	24.143	20.3461	12.6238	8.86719	6.08158	5.42149
245265_at	4.14314	4.07362	4.07194	4.02604	4.08568	3.95587	4.04228	4.18557	4.23329	4.02042	4.01877	3.89973	4.35893	4.38335	4.37687	4.01877	3.97248	3.89973
245266_at	97.7311	110.14	102.173	95.9096	84.1235	87.0483	118.398	134.212	129.884	90.5868	84.1373	89.5361	138.241	136.559	116.698	79.6051	70.8162	81.6987
245267_at	10.1239	11.2354	10.2057	8.18411	10.2275	8.98839	7.51389	10.8374	12.428	11.2539	15.9127	10.2823	13.7722	17.7931	15.9986	9.88876	12.4485	11.878
245268_at	9.43151	9.81913	9.62584	16.6684	14.5342	19.8291	13.4236	10.8394	10.6785	17.4217	13.2057	16.8855	10.8639	7.34437	10.1155	13.0338	15.4925	18.9227
245269_at	196.379	212.521	189.314	188.259	189.221	162.741	213.01	206.259	205.76	199.788	187.287	188.6	177.14	146.436	168.509	223.626	188.414	211.893
245270_at	5470.56	5849.87	6815.69	4412.41	4780.39	4843.64	6684.82	6018.54	5978.13	3861.6	3169.52	4620.35	3401.28	4519.72	4251.74	3272.45	4958.39	4943.95
245271_at	113.028	124.816	131.549	107.698	93.3213	98.4887	117.942	127.432	115.924	103.474	113.904	110.967	119.532	106.226	110.349	128.62	109.896	112.509
245272_at	5.02671	5.05321	3.95864	5.40004	4.92291	4.83632	4.9452	4.88985	5.08675	4.95537	4.84527	4.81728	5.3629	5.52161	5.50802	4.87982	4.71238	4.78769
245273_at	44.0151	34.476	54.3132	64.4902	55.2289	49.5427	56.6931	59.3733	63.4158	50.3532	52.9213	45.6034	74.6792	50.2829	66.6283	43.9934	57.0494	71.1048
245274_at	256.354	238.553	308.277	552.597	438.033	372.609	330.764	352.277	313.925	394.795	399.625	372.15	177.286	190.75	165.995	486.965	409.227	429.798
245275_at	6.20944	5.87037	5.93486	5.56694	5.86989	5.5949	5.8463	6.07047	6.11301	5.69999	5.66521	5.49695	6.41978	7.11673	7.01111	5.65428	5.51549	5.79847
245276_at	11.1746	17.0854	14.8608	147.359	169.134	161.449	12.4015	9.88713	14.8675	102.53	119.975	92.3792	26.2044	17.3044	31.5145	170.932	161.29	168.634
245277_at	365.274	417.342	329.077	221.073	185.332	176.367	313.185	293.263	281.056	243.098	170.221	207.343	760.854	700.398	807.715	154.535	336.113	285.606
245278_at	761.447	662.084	691.819	561.395	611.306	614.492	501.634	472.473	461.842	1145.43	1109.13	1086.58	638.473	586.994	657.855	404.115	572.609	557.168
245279_at	216.033	198.945	212.757	201.793	176.849	215.076	224.371	202.274	190.601	183.872	181.814	208.997	176.588	144.417	169.955	214.644	224.242	204.261
245280_at	48.7153	56.4908	60.8686	39.5662	40.7899	40.7439	48.0318	42.4995	37.9762	41.0159	63.0949	41.3772	49.3285	38.5174	39.4697	95.7324	47.4435	50.6852
245281_at	985.681	1105.28	1119.26	101.22	150.102	123.424	739.059	821.754	828.874	169.69	171.16	163.196	630.019	761.619	591.205	211.606	208.603	206.794
245282_at	154.691	155.967	173.717	64.3393	86.9535	72.6728	137.946	157.001	143.159	106.931	74.8788	86.1305	141.923	125.062	122.351	57.9957	93.9675	88.9312
245283_at	16.1001	19.9619	21.7121	23.8302	22.4154	20.8075	15.7056	16.5807	14.9526	30.722	29.9125	27.8103	15.5311	18.8386	15.2454	25.6864	25.7921	21.2603
245284_at	187.534	165.559	196.411	90.7656	129.745	115.052	122.263	145.686	114.223	108.221	94.9687	101.412	75.286	109.392	89.3965	109.536	84.929	102.131
245285_s_at	560.381	530.457	457.349	403.9	348.184	423.855	508.022	365.785	381.946	358.378	288.199	361.944	607.352	468.319	539.189	378.262	455.287	320.407
245286_at	3456.63	3417.6	3294.5	1887.87	2017.56	2044.3	3570.58	3040.02	3130.26	2740.29	2459.37	2788.15	3114.47	2601.53	3113.26	2165.18	2502.27	2174.85
245287_at	56.8634	51.7667	56.1646	58.6955	50.92	57.7579	65.9692	56.8961	61.3985	46.4637	50.6269	39.4121	63.2207	59.8447	63.6533	43.0274	44.9201	49.6344
245288_at	129.391	157.622	149.687	179.488	194.409	187.541	123.98	110.876	116.07	213.54	199.17	241.466	157.645	129.903	143.757	237.18	194.545	198.875
245289_at	1485.05	1476.48	1531.11	1116.1	1197.19	1197.41	1749.03	1723.36	1894.04	1347.51	1419.85	1393.73	1557.4	1424.12	1531.08	1498.97	1372.15	1421.69
245290_at	286.141	261.416	283.008	110.603	100.471	112.74	299.207	319.283	324.946	131.451	37.2019	138.548	245.461	248.801	266.129	19.1649	110.585	53.1435
245291_at	71.1837	47.6623	75.0976	57.5165	54.3914	55.2652	48.438	51.9201	55.8013	53.5467	56.6465	46.9781	49.6589	51.4805	44.1926	71.7739	63.3533	65.5263
245292_at	809.341	655.939	772.949	1211.29	1026.15	1016.96	913.87	871.273	1053.87	1385.94	1286.9	1291.64	939.834	801.599	922.299	1233.43	1207.02	1261.82
245293_at	102.465	108.818	129.015	171.516	196.093	195.478	134.251	115.986	104.649	127.899	152.07	91.1522	99.8862	105.571	110.106	287.661	194.233	223.865
245294_at	137.935	144.663	136.335	95.4302	99.008	111.901	134.997	127.126	119.247	125.252	115.127	116.881	138.571	93.352	109.698	170.109	141.075	145.716
245295_at	66.132	58.5102	55.893	68.3442	67.4018	64.7105	60.4997	66.8888	61.2977	78.443	71.3271	76.2477	70.4969	67.5626	74.6332	54.3534	69.2371	61.2876
245296_at	156.538	123.153	133.937	72.8866	71.5487	76.7725	141.446	133.366	136.245	85.5417	66.7543	57.8303	130.245	143.91	100.252	48.8556	106.315	94.6027
245297_at	32.5713	25.8298	24.5521	50.7988	46.9183	39.3127	30.7006	31.3788	20.8127	30.877	39.7422	31.9485	31.2528	27.3335	37.9731	35.5642	30.1308	30.4738
245298_at	76.0147	65.9164	78.1567	140.534	110	108.048	74.0591	82.3643	76.4704	141.795	116.268	121.537	63.3715	89.6521	78.3865	112.907	99.3828	117.169
245299_at	1361.25	1254.3	1217.55	942.443	936.846	998.682	1412.29	1377.74	1279.49	997.247	1086.91	1130.63	1289.83	1273.46	1277.02	1149.36	968.462	1108.69
245300_at	10.6295	9.58658	11.4716	18.7252	14.2882	17.2207	16.9258	12.7793	11.9713	16.2403	15.2817	18.2191	6.52439	8.00523	8.2129	21.934	14.5333	23.6999
245301_at	106.152	127.935	120.063	171.428	176.197	208.826	148.398	161.237	179.706	106.589	113.904	109.951	64.5114	45.1041	59.2576	158.792	126.514	127.398
245302_at	60.9011	45.0597	60.8999	41.6835	46.6186	42.374	54.9664	41.6715	36.6423	66.7132	65.494	65.2362	45.4463	48.0989	56.5327	82.8496	70.5549	57.4079
245303_at	42.5781	36.6716	37.8105	93.4287	63.847	81.5914	37.2554	33.9776	41.9032	63.3819	59.3062	64.7556	32.6021	28.8056	41.3526	50.1921	65.8528	58.2535
245304_at	743.2	612.564	605.894	142.49	171.245	111.781	606.654	569.677	593.467	320.019	332.726	275.438	730.818	668.74	723.202	286.464	184.542	292.439
245305_at	48.8476	46.5746	42.3931	29.9248	53.1457	34.5845	57.9933	65.6313	62.9279	44.5187	53.8003	41.3118	288.211	201.586	251.731	63.792	53.723	52.8496
245306_at	4815.86	4407.7	5513.19	82.0249	103.516	85.781	2688.83	2972.91	2731.58	179.156	206.107	170.95	1480.12	2238.48	1741.36	113.4	122.082	71.1603
245307_at	74.3608	72.4671	82.2222	98.606	125.535	111.552	77.5204	87.6762	70.6361	91.5143	91.9173	92.7575	66.9314	66.0017	58.0791	121.522	109.486	125.628
245308_at	147.353	132.014	131.971	104.77	106.091	99.1301	144.192	121.332	130.151	119.955	96.3756	135.943	124.539	142.801	142.496	126	95.1053	101.913
245309_at	9.7384	7.78983	8.73936	9.13955	12.4316	8.89692	10.3127	9.19076	8.82631	13.0447	13.3823	10.4711	8.73936	10.2675	12.6745	14.1176	11.6734	12.8006
245310_at	84.0647	63.0573	57.1092	89.8345	77.0632	64.5883	74.6915	62.5003	66.7022	80.6782	88.1964	74.2937	67.6681	52.484	56.6675	115.34	73.9709	67.7627
245311_at	910.517	1010.19	843.124	1624.98	1481.58	1548.03	941.09	946.517	973.968	752.461	835.505	776.785	636.522	718.317	525.09	1689.23	1053.72	1107.88
245312_at	37.4211	40.8293	31.3235	56.2408	38.1255	35.516	34.1848	43.2871	42.4437	42.2385	51.1537	49.3295	47.4572	44.6947	41.6766	50.8896	40.131	41.5569
245313_at	135.717	169.106	128.356	260.558	211.345	193.862	185.503	171.287	178.536	158.818	185.587	162.921	574.329	590.379	558.049	222.801	151.428	162.898
245314_at	17.0714	16.8249	17.8612	17.1769	17.0714	22.7512	17.2859	17.0714	28.3129	14.4585	16.4275	14.8705	8.62949	17.6852	17.0504	14.7005	17.8972	17.7209
245315_at	595.812	498.543	551.079	1083.57	780.785	989.616	635.399	746.167	631.911	397.227	474.486	416.862	551.577	501.501	635.555	594.663	576.906	625.249
245316_at	118	97.6347	104.705	158.687	125.54	153.683	95.7914	111.979	118.145	103.444	125.144	120.182	67.4655	79.0381	73.1039	61.2951	111.864	79.6181
245317_at	1693.81	1933.34	1936.4	673.481	768.47	654.149	2089.77	1953.46	2274.3	1332.92	1144.37	1272.21	5082.63	4594.97	4795.73	1073.25	1568.54	1213.01
245318_at	2251.07	2066.12	2515.1	184.235	228.089	153.381	1883.33	2043.67	2218.25	285.847	240.897	279.461	1126	1209.47	1137.43	279.84	383.857	342.102
245319_at	45.3689	34.8197	41.0151	32.9339	24.5738	32.9826	49.3994	36.0266	33.6146	31.9682	30.6571	33.8974	96.3696	100.147	119.613	47.5391	43.5153	47.3345
245320_at	163.394	146.469	139.929	226.906	220.747	237.214	157.59	216.259	170.119	234.526	205.857	234.902	136.935	124.672	144.248	180.894	209.47	208.701
245321_at	783.709	744.437	747.87	315.878	348.514	309.832	551.532	546.783	622.29	439.737	387.86	437.575	722.505	745.171	729.063	478.096	434.012	491.952
245322_at	7.0861	6.83902	6.36124	7.37173	7.00938	6.78418	7.87833	7.25934	6.85308	6.95832	7.17573	6.83228	7.40237	8.05438	10.0497	6.91245	5.59513	6.39872
245323_at	1406.91	1119.08	1238.53	3870.65	3727.11	3644.44	1801.68	1296.21	1409.28	2173.2	1970.79	2505.72	1254.51	1051.34	1439.64	2512.11	2834.1	3130.32
245324_at	93.7902	103.831	92.3223	565.527	340.406	451.924	176.378	157.499	181.859	593.053	434.075	487.246	134.212	123.82	120.466	214.3	282.288	267.829
245325_at	2498.42	2148.88	2265.63	3784.5	3945.46	3879.97	2960.48	3078.8	2808.84	1680.58	1270.53	1853.21	1488.35	1399.47	1618.51	2242.67	3421.46	3048.85
245326_at	54.4696	60.9436	42.9153	46.3189	53.8401	47.3433	35.8399	29.8408	25.754	63.6311	61.6993	64.6653	26.6352	27.3178	25.327	26.4292	45.0819	25.3426
245327_at	35.2739	37.6145	35.7553	63.2454	48.1414	39.4202	40.7815	39.5183	42.656	53.8766	44.0006	39.481	29.2167	18.0585	27.5527	26.609	44.1101	49.3731
245328_at	148.593	175.648	165.821	462.896	557.339	548.527	149.564	120.825	134.311	595.005	436.238	559.956	192.608	173.496	184.599	377.788	813.692	636.365
245329_at	23.1443	20.2997	23.0201	32.1103	35.497	22.7736	26.6505	23.0144	21.747	14.5067	19.8711	19.3937	71.0727	72.8641	84.0924	31.7509	25.3499	31.3653
245330_at	146.499	125.088	141.725	55.9976	91.0344	64.3592	116.651	118.91	111.206	70.0927	73.137	59.316	118.352	124.652	135.286	167.45	110.876	133.58
245331_at	261.459	284.921	298.115	153.772	141.318	166.788	234.767	264.093	279.427	148.984	150.287	170.357	337.406	359.536	346.992	271.111	169.234	253.048
245332_at	234.636	193.29	251.287	270.738	251.597	259.703	271.239	274.76	239.692	240.126	293.232	219.792	267.895	240.323	274.535	332.126	220.298	289.927
245333_at	298.813	269.65	272.188	380.029	348.42	405.196	272.221	239.22	282.659	367.789	413.078	311.561	247.202	293.799	257.822	496.356	370.823	377.757
245334_at	659.641	621.957	592.724	417.522	429.878	387.676	583.137	662.628	626.136	459.345	565.213	457.011	542.889	501.428	706.973	618.734	497.571	618.036
245335_at	5.03043	4.98272	4.45963	5.77588	5.381	8.05537	4.95903	5.21764	5.45488	5.59651	5.08111	4.89468	34.053	38.9734	71.7886	10.777	10.3933	9.87009
245336_at	323.667	300.846	263.876	322.506	448.558	340.637	235.129	203.608	230.462	956.563	949.984	884.163	237.458	197.09	257.748	1007.07	881.552	1042.23
245337_at	41.4904	39.6704	38.0098	52.5746	48.8757	38.2793	49.4167	44.9635	34.6542	62.8736	85.0721	54.2062	31.7197	35.5131	30.5383	74.2235	49.7528	55.1745
245338_at	118.179	114.709	104.752	198.19	202.374	160.214	134.961	148.893	157.344	125.072	142.809	136.654	160.266	121.38	153.384	169.541	168.468	170.06
245339_at	52.88	54.4048	49.4675	83.8354	71.712	83.4832	67.9606	66.7653	95.9017	59.1408	56.5651	63.5148	42.3183	41.2084	50.0891	51.8188	61.1631	84.8558
245340_at	293.431	263.746	228.844	449.083	436.067	438.33	429.807	394.771	456.983	277.967	299.274	258.857	280.007	237.599	262.282	414.906	356.623	408.06
245341_at	16.1187	23.8459	20.6492	16.3897	19.639	22.0239	24.5829	24.0268	18.5895	27.022	28.5148	26.3263	11.0487	18.8432	13.7874	32.7592	21.4859	18.4231
245342_at	1957.4	1883.88	1899.42	3399.19	2870.54	3094.52	2202.99	2476.05	2403.89	1938.51	1942.02	1894.51	1206.94	1399.07	1393.27	2112.21	2181.07	1734.83
245343_at	62.8788	61.5601	65.8717	46.4103	47.4143	38.1584	60.3705	67.316	71.0785	46.1593	35.4315	33.8591	38.5602	36.7296	27.7145	85.2016	38.9358	61.0263
245344_at	96.6372	101.487	90.1413	98.6588	95.7443	94.4629	80.9504	78.9992	81.0836	93.898	118.442	89.3084	107.15	115.573	84.3588	115.706	92.611	96.162
245345_at	6.18297	6.99558	7.13664	6.9904	7.74962	6.19135	7.33397	7.31261	8.66572	8.39178	7.18488	6.82919	7.88254	8.04082	9.68932	6.9449	6.69916	6.94204
245346_at	12.7138	29.0259	14.7525	7.84345	9.747	10.3028	21.3552	24.6481	18.1452	11.8174	10.3839	12.3651	28.6733	17.9148	13.7103	11.5726	8.53536	8.56627
245347_at	201.929	167.271	190.582	102.906	121.064	123.041	150.349	116.165	150.327	143.38	134.344	141.897	91.0418	131.052	94.9765	109.32	122.452	82.2509
245348_at	317.961	384.694	354.673	186.684	192.739	174.404	353.299	387.358	395.908	286.123	315.768	268.92	277.79	305.629	300.26	291.509	204.778	249.918
245349_at	8.62346	7.08872	8.28866	4.22929	4.47505	4.3391	4.43187	4.92635	4.38353	4.4677	4.69132	4.35893	5.20725	5.1808	5.13334	4.09795	4.26348	4.21196
245350_at	542.566	610.203	579.4	779.567	666.245	819.933	536.009	522.015	469.195	660.468	616.628	688.277	528.097	499.096	539.432	634.825	828.294	667.669
245351_at	211.241	223.195	209.711	271.786	261.287	262.503	186.397	196.751	178.895	231.107	257.6	257.6	199.46	162.547	178.44	211.033	251.866	260.708
245352_at	7.67233	5.89453	6.62309	7.17043	6.85055	7.19255	6.56513	6.13062	8.80892	8.86009	9.12567	9.41893	7.46037	5.53547	6.87818	6.8542	6.65008	6.38218
245353_at	8.39074	11.2599	8.06563	6.84295	7.23137	7.15278	8.75553	7.72578	8.58106	7.66887	10.0985	7.13869	8.50456	7.96489	8.40523	7.25219	9.49898	7.34634
245354_at	578.235	434.039	595.323	260.494	311.433	359.13	374.028	364.166	324.559	217.801	251.349	219.332	202.399	204.211	171.442	221.879	217.323	199.125
245355_at	2761.82	3704.36	2922.18	4812.6	4383.05	3782.71	3422.23	3299.18	3545.95	2798.99	3353.21	2649.79	2205.94	2293.91	2091.49	3258.37	3302.36	3269.76
245356_at	9251.47	9161.28	8762.84	10095.7	10181.1	10189.1	9862.52	10326.9	10782	9959	7248.4	9439.19	7828.11	7440.57	7820.4	4709.34	9165.62	6860.64
245357_at	199.825	168.516	204.37	99.4339	90.0044	100.698	134.684	120.476	164.299	71.6826	85.4259	78.1567	76.2148	110.671	93.2657	85.0303	66.3129	60.3557
245358_at	105.002	130.156	122.741	163.901	144.316	140.791	124.59	136.396	127.228	124.682	102.792	109.522	93.2715	96.34	92.4552	166.521	128.647	149.739
245359_at	198.154	179.344	150.85	438.321	362.628	413.757	205.76	165.097	227.107	330.642	261.835	358.791	229.244	173.925	194.125	91.9061	260.944	172.197
245360_at	290.356	264.723	248.077	262.967	217.976	191.583	290.618	307.923	267.884	306.837	291.001	304.426	228.764	167.103	225.092	309.393	270.772	290.63
245361_at	206.645	221.519	212.709	178.877	160.711	166.084	202.582	241.318	243.869	322.096	325.046	347.841	143.124	165.033	169.952	234.636	159.053	157.742
245362_at	115.872	139.648	127.602	65.6017	77.9835	66.1333	103.465	104.58	104.914	157.069	191.602	168.544	42.0454	59.2941	42.209	126.218	127.71	133.284
245363_at	8.44295	8.97548	7.11176	7.5504	6.72231	9.63376	20.968	9.05696	12.0614	7.61612	10.385	8.10715	58.9431	75.3819	75.2025	7.69664	10.0406	12.3243
245364_at	27.6747	27.5075	28.727	39.1837	46.8336	55.8965	38.6768	30.9671	37.7972	30.4675	27.977	28.015	14.1987	27.1851	19.4996	32.6389	40.6444	44.0105
245365_at	83.5878	68.1731	76.1522	137.324	126.847	123.472	94.4338	93.8961	73.0994	103.056	100.363	89.8161	121.205	117.458	127.788	115.746	100.828	111.527
245366_at	63.3962	70.6129	66.1823	88.6869	87.9739	80.7644	56.0517	78.8386	54.6377	93.5996	114.279	93.3749	51.453	38.7555	55.9896	115.725	77.301	97.5025
245367_at	19.3527	31.2515	26.6702	45.5753	28.3757	28.0547	29.3129	24.9419	37.8586	24.5819	30.0357	28.2072	26.342	13.7931	23.2205	60.821	40.3922	44.6561
245368_at	24.8565	19.6189	34.588	9.7821	8.41456	11.7344	11.5584	11.5053	9.33611	9.45576	7.84635	13.6326	8.43671	9.37762	8.49513	7.30391	7.82833	8.04033
245369_at	4.14212	4.09677	4.19124	5.61355	4.15422	3.9562	4.10941	4.28525	4.28332	4.08333	4.06877	4.02455	4.94723	5.4027	11.421	4.05059	3.96091	4.12193
245370_at	33.4019	24.8249	31.2444	56.4827	50.603	69.4507	33.1415	34.149	28.9687	63.1701	51.1716	71.2715	25.8531	25.8531	18.5411	66.668	50.3087	68.3091
245371_at	4.58483	4.5886	4.48498	4.24478	4.89186	4.30095	4.70155	4.58031	5.1776	4.49457	4.42642	4.30024	4.86741	4.8991	5.5562	4.7244	4.22808	4.23503
245372_at	704.481	673.965	640.259	1781.3	1163.57	1374.6	935.558	897.463	892.098	552.268	772.633	632.912	441.801	458.609	494.596	981.922	992.731	859.365
245373_s_at	1868.54	1600.07	1552.42	1817.07	1498.9	1910.53	1565.35	1448.18	1316	2819.12	2687.83	3086.01	1972.65	1485.42	2354.92	1808.8	2098.2	1951.37
245374_at	88.5285	88.336	84.5236	99.4706	110.319	97.8456	66.1551	81.3221	79.0494	115.134	108.78	108.414	68.5649	98.6892	82.0299	124.608	105.307	110.999
245375_at	7.72118	7.17573	6.994	6.75581	6.80819	6.07022	6.97134	7.65612	9.60274	6.94276	7.19241	6.09083	9.40173	10.1116	9.84276	6.66759	6.59675	6.63916
245376_at	5.19273	5.08069	5.08069	4.85403	5.25582	4.76474	5.05882	5.05633	5.15067	4.99399	4.91866	4.81867	5.76806	5.91977	5.44884	4.89729	5.88292	4.80089
245377_at	6.49432	6.47301	6.33309	6.26375	6.44859	6.05031	6.31957	6.52426	6.79673	6.31905	5.95269	6.22374	8.58282	7.93973	9.03838	6.27405	6.78892	6.19568
245378_at	4.72731	4.60219	4.69827	4.65027	5.2141	4.62151	4.42133	4.7417	4.76572	4.64816	4.70039	4.66519	4.85044	4.87201	4.89247	4.65027	5.03395	4.62132
245379_at	19.0518	17.1135	14.5946	19.7726	15.7379	17.8341	14.5479	15.7897	16.2509	19.4576	17.483	18.1474	22.5206	17.2122	18.7029	22.9587	18.0604	22.2603
245380_at	14.7913	22.7606	13.8527	13.6348	13.3445	16.1657	13.3587	15.2241	17.2179	13.8522	15.3006	13.3127	14.3898	15.4027	15.7185	17.8766	13.6001	14.5551
245381_at	8.4187	7.77784	9.91072	6.18309	6.41543	6.08833	7.44706	10.6829	9.51186	6.84717	6.66074	6.65363	27.6236	42.7481	49.5	8.67783	6.77499	9.37762
245382_at	100.702	113.628	95.1757	124.774	121.323	137.014	82.7186	88.3269	91.9136	181.65	91.5425	204.976	94.2594	54.5827	86.2226	67.6625	160.714	118.481
245383_at	22.8102	30.8941	16.3917	12.4408	17.6802	12.9428	17.8048	14.952	30.3657	16.0137	15.871	15.9441	13.0732	21.1332	17.44	10.3399	10.7527	9.78652
245384_at	22.8942	15.5537	19.5549	16.1335	18.9181	12.4795	17.1096	13.5792	19.6036	16.1807	11.4735	12.4954	21.231	28.8595	16.1309	13.5235	8.24519	8.93391
245385_at	49.6476	49.2748	41.3798	40.9856	38.3241	34.3876	51.3137	37.2248	53.3776	42.5414	53.7108	47.888	62.6378	55.7806	57.6252	63.5435	44.339	43.3885
245386_at	872.831	748.654	712.118	615.288	620.516	568.531	689.776	790.628	725.106	706.349	1069.99	862.779	489.332	515.707	479.148	639.352	666.381	765.131
245387_at	283.438	342.426	389.528	838.117	543.838	732.155	367.245	291.204	358.901	368.099	318.158	501.892	265.245	285.337	340.036	372.931	597.847	488.588
245388_at	207.748	220.878	204.068	55.2164	58.6521	56.3657	106.707	130.263	109.96	50.5044	63.2883	68.2264	76.4076	87.5575	65.4631	50.4215	32.9752	36.329
245389_at	6.20357	5.05446	5.74607	5.59238	5.85568	5.61309	5.74229	6.05727	6.43668	5.79823	5.62602	5.81827	6.56728	6.39662	6.07023	5.74229	5.45533	5.49492
245390_at	47.8467	48.3247	54.2641	105.218	80.0477	76.9778	77.5873	57.8909	75.5369	34.2832	37.555	44.1744	55.8012	45.0985	49.7855	47.6975	55.8379	51.9243
245391_at	2352.17	2167.4	2127.88	1404.83	1591.94	1492.85	2049.64	1790.98	1634.88	2894.22	3044.96	2694.58	2520.69	2138.04	2159.94	3608.25	2630.27	2490.22
245392_at	10.7337	11.6442	10.611	9.84215	15.0624	9.71562	10.5614	10.6972	10.9084	10.257	11.6892	11.5252	12.7246	14.7816	11.5898	10.0882	10.2258	10.3136
245393_at	540.941	506.178	496.805	99.7386	57.283	89.5618	1046.52	1063.24	1017.02	102.555	93.2523	112.449	3171.86	2580.51	2993.99	258.076	349.639	345.697
245394_at	2068.58	2415.02	1870.8	2371.23	2380.59	2331.39	2460.48	2276.87	2404.53	2112.73	1939.67	1836.39	1607.68	1476.51	1776.04	2441.75	1972.61	2081.37
245395_at	94.0004	76.4562	94.6279	129.825	111.515	145.172	126.34	122.288	141.964	116.263	140.053	112.954	63.9337	44.0829	90.9204	111.848	135.957	120.798
245396_at	98.7642	74.6086	72.3778	45.3791	51.7136	44.4256	52.7347	35.7928	52.0204	55.2924	54.7815	45.4743	38.3753	34.0992	27.1332	52.9648	35.3588	46.9916
245397_at	137.121	78.9991	115.924	55.3015	49.1353	53.137	57.5731	59.9184	39.4316	76.8988	85.968	65.3757	64.6865	63.6899	56.7887	80.3079	68.5888	72.6847
245398_at	204.094	242.515	220	164.11	162.554	158.115	243.258	224.04	199.838	209.418	153.438	220.516	148.825	162.801	150.121	129.203	164.083	166.118
245399_at	5534.29	5358.78	5102.72	863.842	1117.01	871.255	5741.78	5859.49	6639.94	1083.64	1255.8	1292.06	3457.35	2814.96	3173.16	3502.08	4126.13	4344.42
245400_at	595.959	592.919	776.61	509.976	511.792	524.271	586.524	584.587	567.551	485.876	458.779	404.755	421.338	470.991	409.799	396.885	469.291	417.008
245401_at	279.381	314.609	202.291	206.595	165.002	165.464	551.011	421.788	471.378	296.405	448.079	349.883	419.266	477.889	489.573	106.624	112.237	131.241
245402_at	6.1354	6.0166	6.31309	6.82106	5.64199	5.86242	5.99489	6.32944	6.42744	6.67965	6.29962	6.10523	7.5504	7.32133	7.54792	5.48139	5.65498	5.43989
245403_at	4.86201	4.87401	4.73508	4.53258	4.70986	4.61222	4.65103	4.85084	5.05218	4.64225	5.88848	4.48517	5.20533	5.70303	7.75312	4.51975	4.97311	5.11966
245404_at	40.6002	48.2612	62.2697	53.7959	66.1076	56.8517	35.8222	39.9697	41.5928	53.472	75.4315	68.2124	33.7391	35.9054	32.1024	54.1717	46.7653	45.7216
245405_at	22.3896	24.5829	25.8962	21.6542	17.455	20.8958	19.6928	23.6867	14.3308	19.9619	18.6729	23.5877	21.8145	17.1719	12.1999	10.9515	21.0085	21.2839
245406_at	10.6634	10.4055	9.99904	12.1654	10.6005	10.3735	10.0745	10.6424	9.67023	10.4776	11.4145	10.4055	15.4141	11.7924	15.5234	12.2466	9.29555	9.87171
245407_at	1698.62	1659.72	1772.83	1006.76	1260.99	1200.56	1821.18	1781.08	1691.9	2104.93	2194.37	2022.21	1702.67	1366.58	1633.34	2042.96	1592.79	1861.87
245408_at	43.4064	38.2408	46.4275	76.7662	68.2179	63.9665	47.8211	55.179	39.7895	49.8223	58.6955	51.3115	20.7802	24.4128	16.6729	51.9841	56.4908	50.0397
245409_at	6.27199	5.77707	5.77209	5.7404	5.80014	5.60111	5.99489	6.12382	6.17054	5.91418	5.7404	5.71969	7.53305	7.37566	7.92507	5.76119	5.06485	7.68116
245410_at	40.692	29.6027	49.0345	22.5354	22.6649	28.1482	30.4807	33.2937	24.0683	42.7692	45.9135	40.9536	36.8278	32.6665	42.9135	50.8771	46.6684	35.0385
245411_at	9.07502	8.74475	9.09648	12.3307	8.74565	14.7183	9.93273	10.398	8.7514	12.1397	13.7264	12.601	10.7498	11.5063	11.9345	9.86827	10.9774	8.7338
245412_at	311.152	234.347	280.203	130.122	136.002	129.564	449.231	400.077	440.442	174.035	92.2522	178.202	393.622	305.572	358.666	87.2845	206.103	155.893
245413_at	95.7797	84.9046	125.528	155.89	160.2	140.179	84.2861	90.9802	87.1306	88.5285	94.6844	111.97	85.6051	86.3822	71.4694	146.647	134.864	157.59
245414_at	9.62486	11.0353	14.2238	22.1932	28.0259	25.951	13.6822	15.8987	16.1647	19.2078	20.3624	29.9938	8.79717	18.3118	14.5321	18.1955	22.8726	34.476
245415_at	225.592	261.975	270.171	178.851	234.868	233.243	213.273	227.957	195.101	218.514	244.104	259.757	217.234	289.356	207.799	357.673	283.846	358.879
245416_at	100.242	99.6731	75.7575	115.111	124.636	113.96	88.6322	84.5357	83.5244	132.585	141.682	147.747	53.6293	50.7456	52.726	121.657	129.825	152.157
245417_at	7.46099	7.91628	7.35872	7.34573	8.38454	6.98983	7.32976	6.1198	7.58335	7.35147	7.42552	7.18193	7.88318	7.16807	7.92735	7.23047	7.04749	7.12551
245418_at	72.2487	61.348	76.9336	85.73	94.7038	97.2945	56.5814	51.2357	69.4251	136.083	135.648	128.647	51.3864	70.4246	60.9311	167.461	105.834	130.204
245419_at	5.33303	5.21389	5.31269	5.22203	5.13313	4.90313	5.17293	5.77731	5.46924	5.08006	5.0786	4.92392	6.04385	6.16598	5.76925	5.66219	4.87421	5.28201
245420_at	6.88892	6.53419	7.14103	7.52655	6.64353	6.9011	5.70233	5.73287	5.75363	6.1939	6.2102	6.10398	6.39662	6.40924	6.81098	6.77499	6.12307	5.51368
245421_at	27.8012	25.2538	28.6828	69.542	59.005	61.6182	36.9559	42.1778	34.4257	41.8275	47.7485	43.6603	25.5864	25.1291	24.1574	53.7042	49.8592	49.6364
245422_at	10.9418	12.3157	11.3313	5.98665	6.42995	6.02712	9.99802	9.00928	7.84007	6.35354	4.29945	5.66637	28.1378	28.2385	27.8703	10.1672	8.93061	11.3523
245423_at	9.30319	8.12049	8.48885	9.82801	10.9925	11.1719	10.7885	8.59023	8.30126	9.61873	18.2161	9.12417	7.77385	9.49234	8.19959	17.9723	11.1074	15.9644
245424_at	5.98235	5.69999	5.70983	5.93535	5.76167	5.4352	5.87519	6.0625	6.37066	5.64894	6.19975	5.40736	6.6643	7.01745	7.49508	5.53933	5.65986	5.55346
245425_at	173.041	167.612	170.697	186.061	183.646	173.155	176.53	174.225	178.126	158.024	155.155	149.364	158.206	131.192	145.351	237.497	174.039	196.492
245426_at	40.7832	28.2148	41.3636	35.6834	25.7948	31.222	25.1622	32.344	34.0964	23.5562	28.9705	25.2206	23.329	21.6041	25.4308	28.6881	23.6537	31.4272
245427_at	160.933	133.574	138.025	132.994	105.076	101.162	162.928	167.09	186.788	74.2052	104.791	93.3289	145.992	124.125	153.962	92.027	112.713	90.2525
245428_at	72.912	67.6264	75.9257	60.7462	55.6524	55.5611	69.5792	52.9061	56.6105	49.3477	37.0707	61.0815	58.0624	55.5109	72.0604	22.9653	64.8834	52.1637
245429_at	5.32821	5.29222	5.08319	6.63316	5.13651	5.04016	5.27746	5.51731	5.14453	5.27507	5.14137	6.0832	9.08304	5.76688	5.83	5.30136	5.82018	6.33022
245430_at	117.84	94.1994	96.6769	186.244	204.799	196.67	99.9806	87.7591	103.105	141.877	161.522	133.333	130.007	108.026	104.409	131.338	143.866	161.237
245431_at	141.958	134.4	131.538	101.241	102.956	124.329	158.29	132.057	107.362	142.247	125.437	156.409	98.42	119.385	109.432	146.003	126.93	143.412
245432_at	404.647	353.292	351.035	348.106	352.19	328.867	354.892	368.348	419.06	321.125	344.861	372.303	295.093	285.061	312.279	344.238	322.765	341.758
245433_at	137.886	219.593	160.141	143.282	173.375	192.949	123.269	166.111	113.881	210.782	235.873	216.459	121.517	163.558	108.39	241.68	228.586	273.083
245434_at	82.7151	101.846	92.1291	68.7482	99.4114	104.864	91.9326	109.817	78.7044	105.912	63.1558	94.5095	65.5909	90.2265	82.1126	32.8016	126.493	77.8779
245435_at	5.25496	5.04243	5.16422	5.03933	5.21539	5.00919	5.16847	5.30528	5.34816	5.10349	4.92048	7.78791	5.5382	5.55004	5.68059	8.10682	5.93316	4.99563
245436_at	4.78337	4.33429	4.33429	4.2104	4.30272	4.0224	3.99474	4.42751	6.30065	4.23642	4.25386	4.26856	4.41624	4.62341	4.68305	5.35586	4.15986	4.26856
245437_at	20.4903	19.1334	20.9306	61.1668	69.1092	69.0298	19.1822	15.0413	25.7117	31.2926	24.8336	30.4756	17.885	27.7259	21.4762	37.1607	59.51	41.4036
245438_at	33.636	44.3108	45.6596	44.4676	43.3885	54.4965	42.822	41.9342	40.9907	44.0929	53.185	44.827	29.6483	44.453	29.1005	51.5926	51.0215	50.2787
245439_at	180.238	193.369	175.331	383.164	511.97	388.362	156.821	163.733	164.556	267.016	288.122	281.813	139.21	148.173	132.514	624.197	502.655	539.898
245440_at	3.96857	3.89973	3.87068	4.33964	3.78888	5.11881	3.87068	3.99441	4.07194	3.87259	3.8051	3.76282	4.46917	5.43364	4.4326	4.59048	3.8398	3.76684
245441_at	6.2756	5.66777	5.41381	9.97525	7.25845	5.26587	5.55107	5.31116	5.43922	5.92841	8.33612	5.70866	5.46677	6.10072	6.2876	5.36543	5.10286	6.22885
245442_at	105.473	100.872	96.0515	107.001	84.6921	90.5346	85.6648	94.5793	86.1164	102.282	88.6941	97.9641	92.6376	98.8697	88.2218	89.6611	92.9768	96.6451
245443_at	4.92028	4.87561	4.86621	4.62227	4.70329	4.71373	4.84566	5.21882	5.18229	4.71664	4.70348	4.54246	5.19934	5.51164	6.55408	4.7345	4.71373	4.73858
245444_at	4.18351	4.04029	4.00723	3.96271	4.03448	3.90021	4.15491	4.06292	4.09593	4.01267	4.45963	3.93561	4.19865	4.22912	4.21386	3.96336	3.90021	3.95685
245445_at	20.3486	33.9748	24.2738	14.0447	16.3356	15.503	25.1394	18.9963	21.0508	10.311	16.1021	12.1006	41.1467	20.3636	35.5393	14.0447	12.5842	14.0193
245446_at	74.5719	63.9993	73.5075	80.1037	90.0229	69.2172	80.3805	77.6862	83.5724	74.7866	80.0379	58.3649	49.8101	39.2345	57.8434	88.935	72.0722	74.7529
245447_at	4.3441	4.28948	4.28684	4.36771	4.33358	4.17887	4.3722	4.51085	4.52533	4.29821	4.22391	4.22391	132.895	91.5105	141.112	4.22391	4.13227	4.21819
245448_at	11.4417	16.177	10.7961	10.695	10.49	9.79175	10.7828	12.3258	14.7053	10.3565	9.24528	8.34092	16.8699	16.6989	17.8803	8.75481	7.67675	9.47053
245449_at	3.58463	3.53361	3.53419	3.50009	4.11381	3.44249	3.52202	3.58861	3.58066	3.49693	4.07429	3.88837	3.76684	3.80541	3.72928	3.45694	3.4595	3.43345
245450_at	7.80713	7.90296	7.66729	9.71083	8.37215	6.87168	7.55164	7.81355	7.86119	6.51275	7.54854	7.30361	10.2107	8.17336	11.43	7.36023	7.34905	6.07222
245451_at	17.4701	19.6932	15.8866	13.4198	12.5935	13.7756	16.8388	20.1514	23.1957	21.0292	17.8158	16.9004	22.7195	17.3799	23.9736	14.5192	14.8218	13.727
245452_at	9.44217	9.675	8.89254	8.57718	7.88772	8.72716	8.81906	9.68613	9.24566	8.05239	7.60518	7.19196	13.6169	14.5443	14.1274	7.90426	7.12082	7.23344
245453_at	11.1348	12.1085	12.1449	16.4113	15.5553	19.2319	7.80296	14.7555	10.5142	16.9512	15.211	15.9677	15.7786	14.0424	10.6827	16.9533	15.9023	18.073
245454_at	11.8985	9.6053	7.94006	13.0142	8.5336	13.4529	10.1338	13.3242	10.3492	8.63516	14.3662	10.3782	9.53925	10.4827	10.0757	8.43324	11.1755	10.3645
245455_at	11.6859	10.5142	11.2285	13.5661	11.6284	9.95764	10.4025	12.3898	11.9009	11.9809	10.5709	10.1555	14.8443	15.0376	14.7168	10.8798	10.2427	9.91519
245456_at	38.9742	53.7031	44.3035	27.7088	28.9372	27.2628	29.2623	29.152	29.488	28.6828	29.5486	28.8127	29.2107	31.9761	30.664	25.47	28.1586	25.2657
245457_s_at	28.9622	31.9105	34.0167	22.4292	21.0223	23.6634	28.1829	31.4317	31.0009	21.789	25.6211	22.0782	38.1333	32.0208	40.0733	16.0565	22.6826	21.5292
245458_at	10.0192	9.71044	10.869	9.2563	9.78893	9.58205	9.6937	10.1768	9.91846	8.97622	9.41042	9.03095	9.64603	9.71762	9.94457	11.0138	9.75441	9.76483
245459_at	26.5238	19.1932	27.5329	13.2952	16.725	16.1498	14.6872	27.3414	39.6102	15.1231	16.5012	19.3	14.4366	17.3949	26.6429	18.6385	14.028	11.5366
245460_at	8.12215	8.46761	8.19656	7.60987	7.0995	6.61059	8.47004	9.06887	10.116	7.55009	8.40558	10.3344	10.1961	9.48415	8.49548	7.3881	9.68096	7.05821
245461_at	9.2601	7.56437	7.802	7.20675	9.9315	8.04379	8.9729	9.95928	7.37415	7.7388	7.13957	8.169	8.81254	9.3942	8.93281	7.32013	11.1074	7.13957
245462_at	30.8459	28.5183	29.2371	33.1913	33.5063	32.2982	35.0896	32.8063	27.2763	27.3998	25.6295	25.514	31.8895	28.7488	36.7236	18.614	29.1867	26.7042
245463_at	73.5588	83.353	76.9746	27.5714	35.7062	36.9916	74.0286	77.6479	91.0867	37.5072	37.7282	35.4234	54.5524	47.7828	50.0438	74.5719	57.8446	81.2503
245464_at	10.7441	10.5	10.7119	9.9036	10.4288	9.96133	10.6188	10.9589	12.767	11.4971	13.2304	12.7217	11.5952	11.2874	12.0964	9.92477	9.96133	10.1436
245465_at	4.30608	4.2798	4.24862	4.12836	4.29318	4.21386	4.30095	4.3128	4.40682	4.24618	4.24653	4.14621	4.41479	4.50659	4.59463	4.17921	4.24792	4.13295
245466_at	4.70165	4.60484	4.41117	6.16357	5.90859	4.42678	4.35643	4.38957	5.40759	4.59775	5.74489	7.27755	4.81096	4.79951	4.79163	4.91412	10.2595	4.31856
245467_at	13.2451	9.27476	10.5049	9.47091	10.5883	10.0706	9.90888	9.84822	14.9988	10.9286	7.72895	9.78873	11.1691	12.758	11.1567	8.75427	9.86361	9.94763
245468_at	4.01234	3.97102	3.97102	3.77242	3.91289	3.75942	3.94776	4.03962	4.06492	3.88119	3.96906	3.89813	4.37184	4.25526	4.27067	4.69422	3.8847	3.75572
245469_at	14.0811	13.2767	13.4302	9.79255	15.2591	10.1172	13.1615	17.8663	14.0354	11.9657	11.2308	10.23	21.7783	21.5416	21.5151	10.9583	8.9943	10.1023
245470_at	4.06743	4.04327	3.9715	4.00196	4.07194	3.89013	4.02902	4.13091	4.12938	4.37849	3.91916	3.96792	4.80582	4.31546	4.31546	4.00196	5.19102	3.91449
245471_at	6.45548	6.21378	6.27353	5.87085	6.25475	5.75126	6.26529	6.64981	6.84801	5.94926	5.72769	5.74064	7.86055	8.34502	8.14454	5.87181	5.81015	5.65219
245472_at	6.69201	6.50019	6.33387	6.62364	6.53016	6.33465	6.26066	6.79505	6.91359	6.18525	5.93706	6.67389	7.62896	7.70265	7.65093	6.23449	5.88872	5.6673
245473_at	13.5639	12.5331	12.5517	10.5159	13.6909	11.2206	12.4036	12.5187	14.0603	10.7284	10.8058	11.127	16.5991	18.5095	17.46	10.7518	9.95601	10.6533
245474_at	53.2375	52.5077	53.5533	63.0988	52.9235	61.7627	52.2925	59.0013	53.9286	58.8282	61.7208	63.2401	54.8085	48.6293	41.7889	80.9637	61.6258	71.6207
245475_at	6.27663	7.93908	6.01784	5.82808	6.06848	5.72204	5.91661	6.34976	6.33933	5.88993	5.79466	5.61217	7.0163	7.24712	7.19728	5.83598	6.97291	5.60687
245476_at	6.4433	6.33621	6.30661	6.14751	6.37275	6.1193	6.13692	6.24602	6.55273	6.30402	6.2125	6.34507	8.86118	6.97205	7.45731	6.20128	6.37223	6.14751
245477_at	84.8279	97.3984	86.5846	54.1572	66.8393	50.1817	110.971	86.1977	99.8985	73.0769	65.0195	75.1469	81.287	77.2978	83.9233	69.0042	71.7739	68.5128
245478_at	104.49	95.039	100.433	97.1866	125.458	104.439	99.1301	127.15	111.625	107.804	100.946	92.1405	93.8287	81.237	70.6709	98.6588	105.197	131.149
245479_at	180.119	141.594	167.399	36.9962	49.8766	41.6783	141.67	116.37	148.233	37.2837	24.0688	36.1764	77.5793	53.4841	59.2088	20.6017	18.648	24.2992
245480_at	83.2127	101.867	96.6809	108.778	146.105	110.68	104.525	68.9136	97.5546	162.22	110.712	153.311	109.253	99.4931	112.013	120.671	140.156	116.306
245481_at	216.69	220.806	286.141	228.99	201.023	231.601	263.01	228.651	198.276	230.329	286.611	231.829	183.344	179.883	217.118	352.407	225.388	230.907
245482_at	97.5025	76.3668	122.671	179.212	195.671	226.678	115.037	121.577	110.453	203.566	125.34	166.788	103.289	88.8802	74.091	49.7732	208.218	194.605
245483_at	2109.6	1662.93	1923.52	328.085	378.44	395.412	1396.43	1501	1596.13	519.022	350.545	550.604	2963.76	2724.18	2947.74	354.761	889.628	632.56
245484_at	267.367	267.521	288.17	577.144	687.287	644.415	337.074	406.179	374.02	341.141	240.64	302.184	216.94	229.065	248.189	225.554	384.52	356.499
245485_at	9.55651	9.71922	9.67103	12.2713	10.9497	14.8065	9.84135	9.8705	10.8909	9.04655	9.53572	8.36734	8.39488	9.94416	10.4068	10.1894	9.27457	9.39729
245486_x_at	41.2135	43.689	59.5601	590.477	544.061	661.989	60.0317	76.3323	64.1283	260.644	274.309	356.616	48.9339	47.3189	47.4221	278.991	370.564	289.879
245487_at	66.6337	51.6202	57.6276	45.8231	62.5285	54.8175	63.5044	78.0861	78.6527	58.8331	46.9588	47.721	69.1092	62.9305	61.7855	58.4189	47.5645	58.0362
245488_at	6.89855	6.82358	6.35968	8.49095	6.81294	7.86669	5.8909	6.94233	7.03997	6.65828	7.07243	9.00539	6.95603	7.34362	6.51569	7.71722	6.50446	6.62799
245489_at	26.9467	31.1515	30.6665	23.9381	22.5058	33.5422	32.7632	24.7196	22.4071	30.1185	36.1029	36.9901	24.1257	32.2584	38.3564	36.5941	28.5148	41.458
245490_at	13.3138	11.1389	11.7075	10.7611	12.2054	15.5362	9.33918	11.1645	11.7726	12.6412	12.8127	10.635	12.6184	10.4651	11.5375	10.7487	13.627	16.89
245491_at	31.921	24.6375	31.5015	40.7422	35.1762	34.0586	32.9454	32.1183	32.3646	37.7934	40.7925	31.6962	33.5036	27.1645	31.9	37.0661	34.7854	35.7355
245492_at	57.7176	68.6875	54.6758	48.5256	41.5996	49.5061	71.7798	74.0226	60.4251	55.9137	46.1385	51.7795	31.517	32.7955	35.9534	64.4637	54.5569	65.7744
245493_at	18.0344	19.3762	18.1072	26.8803	20.6407	25.3166	18.8355	19.3341	16.8063	20.236	23.1881	30.5621	15.176	20.0787	20.0787	18.5567	22.4947	14.9809
245494_at	111.495	133.431	118.464	117.246	114.293	112.246	110.798	91.0905	94.1684	79.0722	81.7557	92.2806	81.5445	58.6858	73.7873	84.364	69.6979	63.0741
245495_at	16.1707	16.8758	15.7094	22.7027	21.9755	15.6027	15.7094	16.3198	21.5305	21.9007	26.6516	24.8943	15.4709	17.9531	17.9016	25.7302	21.0755	19.0377
245496_at	31.942	26.0852	31.5274	53.3776	47.3364	56.4398	27.4381	30.0307	27.9914	45.9494	67.1724	57.9861	37.2126	44.1364	44.6066	67.3658	48.0337	58.9323
245497_at	16.8346	10.42	12.9625	12.0658	8.29717	9.93191	10.7965	11.9377	18.1131	9.8847	9.78411	8.50002	15.7159	21.8814	17.021	9.28563	8.05669	9.87496
245498_at	16.4268	15.5556	20.0128	18.1116	17.7657	20.0499	14.3759	21.0336	18.6879	22.2069	22.7442	23.89	15.0287	13.6505	21.3053	27.0909	24.544	21.2363
245499_at	60.1601	59.5284	65.63	36.2917	36.489	39.3426	58.9045	41.2203	74.8789	41.6543	42.9488	43.0902	40.6887	41.39	45.4911	37.3121	39.3426	39.9336
245500_at	6.01932	5.71429	5.60503	5.82473	5.73734	5.33324	5.77992	5.84582	6.09746	5.67173	5.47666	5.27485	6.04608	5.98038	6.08295	5.40781	6.0213	5.28939
245501_at	73.1415	71.5208	73.2934	29.8028	19.5425	21.841	100.417	95.6499	83.8268	35.8951	36.8021	42.7991	81.1135	61.4653	86.2403	60.2987	60.8361	66.8641
245502_at	42.8536	36.4404	47.1424	159.813	121.163	156.834	55.56	65.0863	61.202	58.879	60.1675	49.8019	28.4318	31.5086	31.5948	86.9946	84.1166	90.7618
245503_at	8.69388	8.20532	8.1784	7.26172	6.78334	7.6481	8.16698	12.5344	9.64405	7.14353	7.42094	6.759	10.094	11.1467	10.6673	7.09513	6.97678	7.27606
245504_at	8.45753	8.1437	7.86959	6.51944	7.76172	6.98753	8.74295	8.22658	8.47718	7.13019	7.48493	6.9795	9.34877	10.1555	11.8235	6.97836	7.14911	7.0928
245505_at	7.69838	6.9021	6.87832	6.19733	6.55233	6.67677	7.07723	9.02465	7.09178	6.54829	6.18513	5.93621	9.10938	9.52065	9.2721	6.21365	5.87278	6.22694
245506_at	6.26735	6.0374	6.04385	5.63897	5.88872	5.52048	6.10248	6.2263	6.28256	5.94633	5.6715	5.5832	8.11282	8.86446	7.21979	5.85423	5.72957	5.5832
245507_at	5.29852	5.44817	5.13166	5.25906	5.18356	4.957	5.07819	5.33916	5.3768	5.26836	5.50757	4.98866	6.56162	6.14953	5.6071	5.15617	4.82045	5.07819
245508_at	5.86723	6.83228	6.62037	6.80092	6.92837	6.72093	6.79533	6.86491	7.01774	7.51482	7.62802	6.72314	7.07098	9.34801	7.34091	6.22834	6.84014	5.93316
245509_at	5.60526	6.02229	5.32668	5.93048	6.64872	6.77861	5.51006	5.43274	9.31121	6.33387	7.58023	6.08096	7.23612	7.09076	7.13752	6.01487	5.71147	7.76396
245510_at	23.0428	23.4573	17.9627	16.6148	14.9121	15.4522	26.1485	25.5664	28.0616	14.7065	15.9546	21.4656	30.3657	31.7275	31.8542	19.9808	21.8015	20.864
245511_at	5.55095	5.48274	5.30593	5.20747	5.40625	4.90595	5.30593	5.49943	5.5546	5.21689	5.21517	5.13862	6.43378	6.13112	7.91986	5.22289	5.14961	5.1955
245512_at	327.049	314.196	254.591	1839.15	1582.88	1589.2	423.924	328.638	428.3	748.684	1001.48	837.395	377.99	266.118	319.126	647.121	1005.47	904.476
245513_at	178.122	177.002	176.103	195.86	228.558	227.681	176.103	144.479	167.929	308.835	228.736	307.841	141.778	105.578	138.764	172.218	166.429	168.489
245514_at	31.5197	22.9088	21.9219	18.653	24.6344	18.2971	22.7475	21.4974	21.161	20.1068	25.9857	16.2183	17.6736	17.5377	13.3972	24.8213	27.5013	28.169
245515_at	15.2291	14.0038	14.1274	13.1367	13.7688	12.9982	14.0718	14.8218	14.8926	13.5633	14.4135	13.0073	16.9289	27.0353	16.9637	12.1884	12.3669	12.9003
245516_at	40.3948	37.231	36.0992	51.4276	42.6035	46.2799	36.9384	33.771	38.6975	39.1499	38.5214	39.8132	40.3202	37.3381	38.7436	53.0051	41.3594	47.676
245517_at	6.30298	6.22886	6.58701	7.33488	8.53396	6.19593	18.0263	29.708	21.1123	22.8496	23.4188	36.6694	26.4542	20.7452	24.0416	16.3145	27.4798	27.8377
245518_at	15.2767	15.138	14.9606	32.4538	36.3245	32.984	17.9764	16.8263	15.2191	26.9112	37.2088	27.546	19.9816	15.564	15.0089	27.0865	23.6464	24.8412
245519_at	5.23772	5.0059	4.88082	7.12463	5.17463	4.97761	5.07714	5.15871	5.24008	6.13238	4.79242	4.97556	5.71195	5.49311	5.9981	4.95639	4.6767	5.02961
245520_at	12.1409	11.7547	12.5574	8.68639	10.1114	10.1114	11.7673	14.8437	20.3845	10.3178	11.0061	9.96296	16.1823	24.8683	15.5931	11.494	9.00539	12.7822
245521_at	56.6885	60.5656	78.5462	53.712	56.1785	47.4767	70.857	45.7347	46.3703	45.3568	54.0795	38.0348	44.9598	63.5932	53.5269	62.0806	56.7001	55.4961
245522_at	49.9483	31.4053	36.0029	72.2635	77.6431	69.8828	47.889	52.9789	48.3475	52.4894	59.7844	59.3197	65.4657	66.4957	66.4956	71.3345	65.361	60.7437
245523_at	401.98	398.887	336.645	2165.36	1756.95	1816.4	423.751	312.112	319.927	1107.6	1205.01	1209.77	359.544	437.44	393.646	1419.97	1217.65	1027.39
245524_at	114.307	112.352	105.08	33.9385	37.5242	30.7839	83.6789	90.6761	66.6529	55.7005	53.4962	52.5077	111.117	79.4809	91.4692	60.2616	54.9438	63.5958
245525_at	282.352	229.961	247.527	271.998	231.601	273.443	229.47	236.903	278.03	278.83	320.485	269.905	193.445	209.814	207.475	281.842	239.186	225.856
245526_at	12.7308	12.7131	14.7331	14.3108	15.9999	14.8157	17.1459	16.767	14.4277	17.2136	15.7082	17.8092	10.9592	7.16542	15.6746	11.627	15.595	13.8892
245527_at	6.2698	6.7615	6.94561	8.82612	7.29162	9.60826	7.67659	7.68006	7.4997	7.88772	5.37658	8.8332	8.53413	8.07077	5.62729	5.51652	8.09218	8.14036
245528_at	190.257	210.998	194.038	339.505	408.522	343.574	275.8	284.079	248.679	120.389	119.238	121.283	494.911	422.933	412.467	277.027	264.136	288.454
245529_at	17.6722	19.5529	17.694	31.3853	26.5554	32.2637	16.7271	12.8108	17.5665	25.6832	21.5557	17.6979	15.5477	13.8277	13.7982	28.437	25.2886	29.1388
245530_at	6.58025	6.30505	6.2947	7.15454	6.02254	6.1095	6.29057	6.44277	6.07896	6.1817	5.69437	6.22323	6.88242	7.07766	9.01501	6.25603	6.13591	6.11126
245531_at	5.12239	5.04513	4.96087	4.99994	5.81302	4.68305	4.99296	5.10034	5.37901	4.89769	4.91361	4.79832	5.32646	6.52212	6.05031	4.91361	4.62778	4.91866
245532_at	64.5299	59.416	65.4913	34.8133	40.2887	36.2574	52.2206	62.8827	42.8827	36.4284	38.9678	36.8445	31.4156	48.1909	33.6298	53.0454	37.0319	39.7323
245533_at	45.5416	42.4349	49.9371	42.5974	39.5029	48.7363	41.5569	38.2196	30.9169	62.0144	47.8722	50.1715	56.2639	74.2525	65.5209	85.3627	47.4649	58.539
245534_at	13.092	15.6695	13.5183	19.8149	25.187	16.6729	13.4905	16.8429	17.084	19.8051	17.4149	15.1293	14.3892	14.7555	13.8607	18.2551	16.625	33.3909
245535_at	25.0477	20.2943	25.2294	31.8045	31.108	25.7424	25.5748	27.6111	26.7536	25.1601	23.9371	24.5728	19.2627	26.8285	25.9313	27.7829	22.9285	24.6891
245536_at	14.1594	20.3001	21.0146	12.226	12.2562	18.0122	14.4865	11.4516	10.072	14.2364	14.5964	18.5804	13.0212	22.4191	18.0737	11.0432	16.9944	13.2658
245537_at	9.52358	9.15383	9.26125	8.75948	9.21268	6.83817	9.20058	9.6496	9.82479	7.5566	8.84772	8.80566	12.3304	13.9934	13.2396	8.94787	8.507	8.6921
245538_at	3.73058	3.67967	3.674	3.6125	3.70751	3.57243	3.67054	3.7341	3.80658	3.674	3.6125	3.66677	3.94841	3.95872	3.95872	3.61131	3.63199	3.59946
245539_at	26.3782	22.842	40.9536	19.3285	26.2502	35.5277	29.8071	29.5122	44.0965	22.9031	9.2544	20.6483	22.5985	13.4722	13.7185	7.22543	44.4667	12.6831
245540_at	81.0902	93.2829	81.0769	82.9976	118.766	87.4945	129.745	148.252	117.564	60.6813	62.6686	51.9158	39.7014	36.2351	23.0518	122.648	104.43	111.152
245541_at	46.3494	39.3523	44.3964	45.2879	46.3494	44.5791	45.7366	46.7663	46.9626	54.7837	46.458	46.7932	47.7642	42.6429	48.3009	46.2656	44.7553	44.9229
245542_at	6.25372	6.05652	6.04658	6.44992	6.04907	5.81325	7.03997	6.45601	6.33959	6.655	6.11955	5.93486	7.36265	6.65555	7.4417	6.01389	5.80276	5.97645
245543_at	25.4825	21.1627	26.3755	27.1617	40.5618	36.6423	22.9238	18.5514	29.2996	39.7275	52.9191	49.9781	56.4062	48.3942	34.2635	23.8322	39.5971	31.6156
245544_at	26.4868	29.763	25.4114	47.123	30.922	37.0623	21.7944	24.5773	23.9923	40.5219	53.2714	41.7743	18.9589	31.2207	30.0523	52.0182	51.3664	46.0779
245545_at	7.92377	8.30843	8.29887	8.17437	8.37697	8.10948	8.23571	6.13364	8.54378	8.32619	8.23571	8.15023	8.78435	8.83937	8.81182	8.17437	8.12549	8.12215
245546_at	37.9271	38.0293	28.4481	67.5404	45.6503	66.0953	48.2384	37.9271	35.7164	67.2483	67.1172	84.3657	17.3047	16.343	15.0723	77.7884	68.1255	77.7772
245547_at	6.36334	7.37173	7.54916	7.75503	10.0886	10.5497	8.64652	7.2501	8.32243	8.09783	7.64528	8.39315	8.74223	8.98618	8.95522	9.15834	9.66944	8.20801
245548_at	8.75805	9.3969	9.4939	9.675	9.08714	8.89327	9.38841	10.0196	9.2601	9.17793	9.96297	9.52554	11.6146	11.5162	11.6155	8.97401	8.21713	9.54003
245549_at	5.79085	5.49401	5.53297	8.47492	5.6177	6.93264	5.57586	5.91855	6.21761	5.38985	5.26857	7.31532	6.61059	6.87197	6.87197	5.56168	4.94886	5.20105
245550_at	156.3	157.557	155.461	111.965	201.098	157.363	154.799	174.153	156.474	185.184	105.231	185.946	169.217	142.73	129.586	127.39	242.445	199.633
245551_at	8.7225	8.67961	9.72221	8.2635	8.91815	8.13685	9.22821	9.9413	9.89079	8.69603	9.02428	7.73372	10.4483	11.9122	10.8766	8.04115	7.88545	8.57542
245552_at	9.61142	9.10246	9.07614	8.37937	9.12249	8.26316	9.03968	9.82075	9.70306	8.3904	8.96498	7.94577	11.6179	12.3276	11.5188	8.96498	8.10532	8.07608
245553_at	6.12281	6.01018	6.17028	7.55722	8.21915	6.42057	5.94438	6.28385	6.38166	6.18144	8.69996	7.63241	6.8827	6.28695	6.59052	8.87393	6.00327	6.07671
245554_at	49.1434	35.6915	43.1646	51.139	54.4137	59.5088	45.7535	48.4081	53.004	55.7211	66.8476	70.11	41.8808	36.0081	33.9218	56.8774	67.1779	60.5519
245555_at	909.768	1005.25	862.779	1037.36	936.731	1131.1	1121.57	1043.17	1262.63	1544.91	1460.1	1745.23	508.972	484.332	535.172	1089.66	1377.62	1134.54
245556_at	68.5381	64.6573	68.0892	46.0836	44.1327	51.6223	96.9155	64.9101	85.0442	60.1156	56.3935	72.3838	26.8086	17.8656	18.4936	80.3211	75.3417	70.7523
245557_at	68.1339	66.9438	64.8248	108.649	119.726	113.528	61.0589	68.0668	96.9394	82.0822	77.3582	97.699	89.77	96.7604	76.1851	82.498	80.2782	82.4167
245558_at	14.1827	14.621	23.4717	11.5134	11.1751	11.3626	14.7944	20.7785	16.7952	13.7495	11.5134	12.0495	11.7818	11.0215	11.2663	10.7231	11.8648	13.7112
245559_at	5.06756	4.98579	4.98661	4.91059	5.05155	4.69943	4.97515	4.90595	5.23428	4.97311	6.04534	4.91059	5.32536	5.98038	5.5871	4.80562	4.84885	4.89287
245560_at	24.2175	24.4977	20.628	7.52501	7.77513	6.68555	25.1787	31.7301	28.4697	7.48862	7.55971	7.02293	12.1539	11.7755	10.6472	7.03881	7.06082	7.46466
245561_at	66.2789	59.0971	51.4149	49.8633	53.8047	50.3201	73.0349	78.1278	82.0923	72.3571	61.7728	82.8205	53.4105	34.7454	40.1013	43.5707	60.7811	54.6781
245562_at	57.4574	60.4102	52.3957	65.9502	54.4517	67.3465	59.5333	53.8334	65.9069	70.2282	78.4172	68.8513	32.1645	46.2144	43.138	71.5002	55.2788	61.2473
245563_at	35.8516	34.2283	36.1771	41.1239	35.3254	36.1118	25.7763	25.8526	36.4726	65.6448	65.5559	84.5843	34.5107	37.4072	33.8036	33.701	39.1009	38.641
245564_at	7.99537	7.90393	8.02135	7.74611	7.94756	8.20195	7.91823	7.41516	7.78343	7.91205	7.76906	8.55115	7.10534	10.1772	8.41179	7.64653	10.9632	10.5762
245565_at	29.5875	25.9089	23.5345	10.5831	15.7146	12.0223	15.5119	17.5983	20.7103	15.5918	13.5968	14.3638	20.2626	16.3494	13.0415	13.9475	13.4811	13.0025
245566_at	13.0619	15.1237	13.9544	11.1224	12.5775	12.0599	14.1268	15.1157	20.0886	13.4656	13.3829	9.3507	23.6624	14.2124	27.141	20.1316	13.9951	14.0799
245567_at	13.373	12.6267	11.1884	17.1431	12.0688	12.9056	30.5634	30.4231	21.0068	13.1626	14.2908	10.9736	62.5799	23.6624	60.7761	14.1344	13.2799	13.1594
245568_at	16.2186	16.4126	17.4737	18.8498	15.5576	19.799	16.8904	15.7663	16.4251	21.4947	25.9127	20.6683	18.0485	15.9212	11.0407	34.7176	29.2882	25.0683
245569_at	18.224	16.1256	14.0018	44.9349	40.957	24.2156	18.5129	17.1336	17.1505	29.1586	31.5456	28.92	12.6779	18.6002	16.9623	31.8038	27.0798	24.6532
245570_at	7.33051	7.45011	7.21934	7.3843	6.48099	7.09644	7.28533	7.54621	7.70977	7.78919	6.78069	6.53083	8.54483	8.74672	7.74532	6.86872	5.43922	6.88058
245571_at	7.27008	7.17161	7.13986	6.82835	6.84802	6.79031	7.06459	7.8129	7.09455	6.9224	6.92183	8.49688	7.67517	7.89388	7.88934	7.00852	6.84464	6.8093
245572_at	65.9326	70.3913	65.3193	106.571	115.924	123.644	66.7694	72.7803	59.5259	166.98	137.943	148.212	73.5966	51.3337	80.665	54.5961	94.955	80.0625
245573_at	6.87677	6.92666	6.45204	6.37432	6.64817	6.22399	6.67883	7.4414	6.64489	6.77582	6.6643	6.63044	8.45162	7.23612	7.57587	7.50402	6.52989	6.30402
245574_at	85.6771	83.5965	93.0304	73.9193	85.3277	78.9375	84.8645	63.1999	66.996	110.58	110.507	113.638	47.281	50.087	37.5365	110.798	78.8177	101.17
245575_at	104.284	115.052	112.454	112.234	110.258	118.218	75.0267	88.7378	63.9599	143.813	162.494	150.689	90.9335	78.9116	88.9916	223.801	152.539	171.516
245576_at	32.7188	28.4668	26.0627	29.2167	23.6615	21.508	34.1553	39.8001	37.9692	14.2025	14.2066	9.24566	14.8388	21.5934	13.6912	22.5697	21.4374	21.5823
245577_at	6.39452	7.63806	8.38179	6.85477	6.22246	6.0528	6.12307	6.53097	7.04315	6.1513	6.06101	6.61113	6.51355	6.74444	7.85248	7.74166	6.9669	7.74103
245578_at	23.1576	23.3573	27.1823	21.6383	39.2248	24.458	33.4321	25.5958	26.9943	26.2982	19.2881	18.3611	27.2998	23.021	25.6579	17.0651	31.7418	24.4831
245579_at	14.5443	13.7044	13.3193	16.5793	16.4261	13.6124	12.7822	14.6258	14.7634	14.1089	14.633	12.7115	16.3655	18.0315	15.778	13.967	17.7347	11.9328
245580_at	5.74583	6.07546	6.91685	8.03719	8.67819	8.93832	5.34728	6.20867	6.20154	6.38336	11.5684	7.12521	6.61888	7.00075	7.17456	7.81965	6.05242	7.23344
245581_at	16.5242	16.1114	23.6178	22.2676	19.0981	20.5013	16.0137	16.5854	14.0032	26.4303	21.1966	19.2295	19.4081	20.8992	15.6791	21.2158	18.8905	22.8045
245582_at	6.86378	6.62881	5.97326	9.15383	7.65408	6.38245	6.60815	6.65883	7.02957	5.75977	6.26452	6.27688	6.8779	6.9689	8.10282	6.29237	5.92707	6.74001
245583_at	39.9484	44.2453	45.9758	34.6172	40.5219	39.7961	33.7522	44.4164	33.7994	31.1797	35.5788	25.6674	35.6329	33.3786	22.6393	30.5684	38.6014	38.676
245584_at	57.3042	49.9381	55.6525	20.4663	27.6366	19.4768	42.8659	54.045	50.0613	25.5396	22.3533	27.3942	32.5921	27.7812	34.0593	19.4952	30.2511	26.1898
245585_at	8.86337	8.14822	10.9394	10.4668	9.59387	11.3146	8.08089	8.33783	8.4551	7.71088	11.5979	8.14353	8.62807	11.5191	8.90314	9.19113	11.0955	11.9088
245586_at	93.7555	125.706	103.842	230.77	213.927	191.233	180.56	154.472	148.136	288.223	326.733	283.398	33.9657	45.4463	50.1519	174.035	157.244	182.364
245587_at	25.9196	30.1581	27.9133	31.1362	41.5143	30.8396	27.3593	27.9305	24.7765	26.4683	24.3207	25.1518	26.6516	27.2472	26.426	23.9067	34.7682	30.7195
245588_at	39.4802	34.0167	32.1341	40.3724	26.0637	33.9888	31.8293	29.5705	28.2873	32.084	39.9599	33.209	44.9173	56.6047	52.2839	42.0049	44.2598	34.3692
245589_at	4.87862	4.74267	4.75359	4.70619	4.76141	4.47247	4.83791	4.87541	4.89468	4.84427	5.29374	4.47247	5.3385	5.62186	6.39872	4.97863	4.42333	4.69692
245590_at	7.5793	5.70421	5.69391	5.27843	5.61805	5.58618	5.64442	6.02204	5.82258	5.58767	5.50293	5.59743	7.02264	6.84647	7.23939	5.3779	5.42394	5.26025
245591_at	11.1425	10.8554	11.0793	8.54693	10.3541	9.33707	10.3807	11.6832	11.1517	9.45479	9.96951	9.13674	14.9732	16.3054	15.1639	11.356	7.8166	9.32212
245592_at	83.8544	80.8773	69.837	16.0743	17.6577	25.1611	32.0445	29.1747	29.4154	25.6959	29.1221	26.5369	35.5744	46.5688	33.1586	24.4238	25.8271	25.4522
245593_at	49.3934	56.9463	56.6477	43.9265	37.2393	40.0313	69.3352	61.4072	55.4642	46.259	47.4834	42.8703	38.1623	37.0205	40.9301	53.724	39.7723	46.8249
245594_at	56.3425	65.7285	61.4489	59.4416	58.0434	69.4964	74.5964	62.4977	58.4717	48.7263	50.2953	55.5246	39.1861	32.1949	31.8843	36.8143	80.4417	54.4942
245595_at	10.06	9.27533	9.6937	11.4159	10.5354	10.7095	10.4329	10.6179	10.8014	11.5693	10.2477	10.0828	9.02613	11.2077	11.4314	10.1597	10.3663	13.2369
245596_at	4.81372	4.72672	4.73333	4.62987	4.7415	4.63216	4.72789	4.88303	4.91685	4.67728	4.51679	4.57693	5.33565	5.5448	5.50576	4.64359	4.38425	4.47762
245597_at	17.5954	17.3037	19.8727	21.7809	21.4313	25.7572	17.3143	20.4223	17.6656	22.8467	19.1043	22.9097	16.5773	18.5034	19.9202	19.912	18.9231	21.1331
245598_at	10.143	9.91805	9.98263	11.0025	8.06265	7.74834	9.76162	8.67284	6.17535	9.60294	9.24452	5.65568	9.31925	9.39613	8.40972	10.2696	10.5	8.54272
245599_at	34.4724	27.3706	26.6587	49.0194	43.931	49.4004	50.875	38.4953	36.6016	38.3769	43.7608	39.8672	59.1882	61.6081	67.4032	58.3349	53.2003	56.2188
245600_at	31.9853	30.2126	35.2413	55.7554	47.9628	48.7353	31.7438	44.073	40.5802	54.6489	52.9213	53.9042	66.7529	49.559	56.9171	52.0589	50.8541	59.3526
245601_at	134.422	84.082	95.0194	84.7269	66.6227	73.8767	124.044	108.693	108.39	77.1804	54.3735	58.5005	83.8681	91.6987	91.1129	73.9253	82.3862	79.9261
245602_at	299.49	317.009	295.968	284.412	345.229	272.412	309.8	282.799	285.272	561.245	593.053	600.136	348.936	350.977	358.128	508.345	588.926	533.79
245603_at	6.82667	5.31116	8.96884	13.4413	7.32584	7.29281	5.43085	5.33029	5.31466	7.20882	13.4427	9.98837	6.70907	6.48365	7.52161	7.12287	6.86096	10.6214
245604_at	17.859	18.5072	17.2164	13.762	15.4369	16.3507	27.8583	22.5669	19.2074	19.5658	18.7321	19.3531	14.6462	19.536	21.0517	17.0896	15.9448	19.0753
245605_at	243.814	259.096	261.631	419.525	451.052	429.234	254.204	303.876	331.757	344.28	396.16	404.182	180.275	129.176	188.716	266.228	289.641	346.736
245606_at	42.0006	43.7079	37.4134	62.0603	55.4073	62.1202	38.9678	42.163	43.0663	59.4685	56.8272	46.5755	53.0966	51.7306	43.8157	45.1087	50.6404	52.5218
245607_at	6.99759	8.83029	7.55443	6.86548	7.66131	7.33006	9.13092	7.27456	7.80104	9.08528	6.80846	6.45999	8.61213	8.19521	8.02498	8.61178	8.2907	7.9829
245608_at	56.3657	83.305	89.8013	92.5882	69.5592	85.2926	71.4239	72.4969	52.2925	109.509	98.8048	105.786	86.2297	91.1991	79.6639	105.864	94.6649	109.374
245609_at	7.20231	6.7371	7.60518	5.72533	6.52574	5.55997	6.65787	7.84587	6.7931	5.87374	5.57747	5.5481	8.75499	10.7863	9.22916	5.83167	5.29613	5.61355
245610_at	63.8943	68.3133	60.3136	24.4028	26.6538	24.0663	45.9758	39.9845	47.9785	54.4987	52.4948	61.0714	39.4024	50.8103	50.706	58.0386	41.7143	55.0816
245611_at	5.54936	7.86022	6.87169	5.92877	6.07222	5.80896	7.51235	7.18694	8.76669	5.06568	5.83359	5.89623	5.78729	6.46132	5.82258	5.94438	7.21238	6.44541
245612_at	558.99	539.41	518.979	638.513	674.811	591.01	607.751	634.721	612.161	697.756	584.924	814.361	580.09	599.569	625.635	239.358	606.106	390.377
245613_at	7.87897	7.45302	7.76683	9.98632	9.60254	7.54947	7.7579	6.90791	7.70296	7.65156	7.46896	7.30271	10.8405	9.7825	10.1534	9.86077	8.58811	11.0011
245614_at	4.46037	4.32291	4.25911	4.3902	4.30873	4.35571	4.12074	4.36431	4.36144	4.27699	4.24827	4.24758	4.59992	4.7814	4.65008	4.24827	4.19004	4.43224
245615_at	8.32551	9.68852	5.40492	7.94332	8.2941	8.20734	6.30479	8.26282	8.56204	8.38178	9.27305	7.86604	9.26239	9.05101	9.54042	7.95377	8.98027	9.56593
245616_at	7.78855	7.48186	7.6321	7.61519	7.66603	9.1178	8.17873	7.70075	7.76236	9.27438	8.03158	7.38415	10.3331	8.98286	9.36069	7.38779	9.88592	7.41973
245617_at	13.2233	11.7388	10.5618	9.99412	12.6381	13.0506	10.5155	14.0568	17.8267	11.0043	9.55415	9.80221	15.3062	19.4392	18.4662	11.3346	12.4643	12.4382
245618_at	26.7943	23.5635	27.6395	22.9653	21.0725	17.8737	20.6882	22.0936	17.2674	30.884	26.2885	18.5148	22.3235	23.1547	19.5401	17.8355	22.1536	21.6054
245619_at	21.4956	19.0362	18.4011	19.8499	28.5781	25.352	20.1895	21.4868	21.069	25.8176	26.2755	20.4886	19.2264	16.1398	13.1194	19.3595	20.9973	19.0534
245620_at	6.30143	5.97179	6.09071	8.21915	5.95085	7.49231	6.87197	6.22169	6.26632	6.01413	6.17789	5.23492	6.67883	6.82527	7.08741	5.80824	5.50621	6.93734
245621_at	70.0495	48.2929	61.3203	51.7604	56.7584	51.6287	45.0282	62.7266	51.0047	50.4774	52.6719	46.8701	44.5901	40.4039	39.3458	70.6796	58.8404	56.3703
245622_at	4.81946	4.7029	4.69981	4.11989	4.73236	4.5591	4.7029	4.7934	4.93891	4.68747	4.53892	4.12497	5.04554	4.84646	5.03395	4.87121	4.86221	4.57411
245623_s_at	18.0689	12.9726	14.1803	9.66487	9.12904	9.42009	13.1537	17.9886	11.3812	10.4196	8.74079	9.9511	14.8081	13.7676	16.906	9.22138	11.5127	9.95478
245624_at	14.2331	12.2436	15.0277	11.7663	9.46645	9.22935	12.4753	13.2914	10.5233	9.53925	9.51108	9.29479	8.10849	10.3611	8.28593	8.87721	9.47987	9.38456
245625_at	265.692	295.384	316.658	261.459	247.781	269.163	344.79	370.731	344.988	295.943	224.907	266.567	239.053	208.997	253.391	238.857	264.864	274.151
245626_at	707.861	797.74	607.153	369.621	421.84	348.592	718.996	804.387	799.512	489.854	604.415	524.983	720.652	737.907	787.194	681.944	559.519	557.981
245627_at	5.3904	5.31869	6.0559	5.20586	5.33138	5.11346	5.4371	5.39904	5.45656	5.28212	5.12418	6.01524	18.8138	6.94076	12.6633	5.00518	7.46727	5.22858
245628_at	188.933	185.969	235.902	13.9595	20.4063	13.9636	160.754	153.69	136.565	12.0166	14.2539	9.45615	46.8913	45.3084	32.1275	18.9496	13.7705	11.5006
245629_at	3864.78	3640.99	3479.28	3320.93	3207.5	3159.38	4181.24	3925.25	3861.12	1963.6	1644.45	1990.07	3608.84	3308.94	3852.09	2933.48	2445.01	2436.89
245630_at	7.57214	9.1313	8.73792	14.6655	8.12883	17.1332	8.56662	6.78501	9.52085	9.20058	11.1696	8.69996	8.91338	10.5788	10.4552	9.86361	9.33918	11.2298
245631_at	300.303	307.524	353.727	452.425	407.625	424.796	232.125	255.723	201.644	314.907	345.35	372.839	261.19	304.451	313.526	298.949	408.773	453.803
245632_at	11.8595	12.1699	10.6809	28.3781	26.5855	19.3961	8.79988	12.5002	11.8383	26.5991	28.7358	25.4041	10.6616	10.6459	10.8185	16.9275	23.6736	16.4383
245633_at	404.115	382.292	387.573	245.577	260.253	257.954	402.103	445.391	377.23	277.705	294.198	304.382	307.202	324.033	348.349	333.911	288.483	330.825
245634_at	3.6261	3.53114	3.57698	3.54655	3.61124	3.47331	3.57463	3.65722	3.82767	3.58817	3.51927	3.49966	3.88965	3.825	3.85782	3.52911	4.12108	3.49392
245635_at	4.72808	4.73333	4.72808	5.18399	4.76396	4.77787	4.71083	4.73975	4.78219	4.66251	4.55798	4.41117	4.86181	4.90152	5.31422	4.61904	4.34427	4.58596
245636_at	7.65187	7.59145	5.99489	7.46558	7.64559	7.51728	7.56654	9.23617	8.528	7.59145	7.96619	7.52965	8.12716	7.99603	7.61456	10.6083	9.27114	6.9861
245637_at	2281.09	2178.25	2230.13	538.713	833.842	622.214	2152.54	2270.8	2342.81	1576.42	1511.92	1563.33	2762.55	2144.16	2674.12	1707.78	1676.4	1928.94
245638_s_at	130.237	117.738	94.696	102.007	127.05	101.775	71.4269	75.4532	41.6561	132.666	171.118	193.799	65.6313	107.733	70.1158	153.974	137.969	128.494
245639_at	381.5	413.672	339.227	954.915	859.172	908.201	430.064	395.868	426.948	706.321	690.627	562.33	268.932	307.013	284.43	669.399	556.538	602.581
245640_at	5.84078	5.56054	5.50463	5.18889	5.48251	4.89468	5.45488	5.70796	5.71922	5.17548	5.44146	4.85942	6.63835	6.79449	6.68871	5.61955	5.07819	5.16507
245641_at	53.7649	51.9179	33.0742	79.383	77.6479	78.588	54.2084	46.1575	45.0689	77.301	70.061	59.0995	61.7348	68.5832	88.7087	77.8682	65.7312	68.6142
245642_at	1095.07	930.977	1041.37	2406.55	2289.67	2190.59	974.368	1148.56	1168.69	3184.27	3454.5	3046.09	3754.46	4224.05	3925.58	3330.08	2365.39	2459.22
245643_at	9.97648	8.3935	7.47909	7.9734	8.30843	7.71721	8.28661	7.50063	8.93135	12.7859	8.10282	8.07359	10.8637	8.64474	9.70166	7.62928	7.87121	8.02136
245644_at	47.1521	32.2677	37.6895	30.9653	34.0558	40.3011	41.4036	38.9294	37.1057	38.9999	38.2761	42.1934	29.2395	28.4014	30.3208	46.0023	56.2593	39.2828
245645_at	40.7832	43.3031	48.5415	66.4916	77.5809	77.4536	39.7904	41.6595	26.8985	100.446	91.0606	92.5235	49.5143	36.186	44.1228	67.0236	69.665	82.7559
245646_x_at	6.25835	6.12231	6.12231	6.54977	10.9497	7.6503	6.18627	6.38192	6.39242	7.11468	5.55323	6.06798	6.15282	6.34168	7.59551	5.21367	5.22203	5.37945
245647_at	6.34611	7.40633	7.70423	5.94878	6.59161	7.42278	6.03442	5.87399	5.87978	5.95464	5.37967	6.05429	7.89193	6.51944	7.78344	4.87982	5.71312	5.4513
245648_at	5.63643	5.2459	5.46453	5.10496	5.456	5.6925	5.31662	5.5121	5.80467	6.03343	6.477	5.5448	6.21531	6.40819	6.55004	5.3396	5.33763	6.52426
245649_at	48.95	49.7773	53.1806	40.2912	45.5809	47.9923	38.4858	45.7986	21.9566	59.2381	49.8899	43.6567	54.2887	56.7211	50.5521	70.6013	55.1971	68.0556
245650_at	12.8876	14.9551	18.8247	57.1209	46.5421	39.7275	14.4835	24.7663	14.3332	31.4938	49.8264	45.234	34.8254	24.0209	30.4907	41.9204	46.9916	45.7648
245651_s_at	589.374	572.763	511.876	600.653	596.927	594.334	587.199	823.833	690.131	454.951	378.169	429.032	588.31	497.98	437.278	375.429	483.269	517.798
245652_at	13.2816	12.7209	14.1978	11.6141	13.7999	11.377	12.6044	14.355	12.8839	10.3467	11.7861	13.1081	18.868	16.8491	17.2348	13.3297	11.1604	11.6389
245653_at	5.29722	5.11524	5.26036	5.10999	5.26014	5.3044	5.74748	5.37481	5.4047	5.11209	5.04492	5.05031	6.00993	5.85784	5.8061	5.05571	5.32033	4.92776
245654_at	6.85083	6.55785	6.20765	5.59444	6.07896	5.89647	6.44356	6.48339	6.6095	5.98923	5.87954	5.9052	7.11527	8.39695	8.68853	6.10749	6.1465	6.51917
245655_at	43.7321	38.6195	43.8453	34.7653	26.0903	20.9295	44.2329	46.6569	35.307	27.2993	29.0507	20.1434	69.2001	80.2222	75.6844	25.9606	16.2195	24.1698
245656_at	4.86181	4.78415	4.68305	4.61506	4.68613	4.4813	5.1776	4.9774	4.97005	4.61658	4.57279	4.68459	5.32777	5.26079	5.23406	4.57279	4.47247	4.52347
245657_at	139.817	132.579	127.144	109.545	107.994	117.516	117.343	120.29	117.159	134.058	130.483	108.608	94.4707	65.5101	72.7744	143.418	113.74	146.556
245658_at	6.3079	6.22988	5.95562	5.68456	5.99563	6.00672	5.98382	7.42582	6.34168	5.79109	6.59838	5.42806	7.82865	8.04974	7.22928	5.56671	5.60825	6.3772
245659_at	26.9716	29.6227	22.1186	10.8644	18.4181	11.9428	23.2682	22.7041	25.4621	22.6738	31.8117	21.894	41.4087	34.1925	33.5063	26.9317	29.4057	31.7777
245660_at	167.695	175.086	187.587	126.156	127.599	143.571	175.691	173.005	172.587	171.414	163.048	167.419	190.531	214.107	166.295	219.882	167.764	185.351
245661_at	11.0586	12.6812	12.6064	14.3226	17.7245	14.6354	12.2245	12.7293	15.9219	18.3769	14.1524	13.618	8.5501	13.1718	14.0308	12.4848	17.3421	14.1541
245662_at	7.68479	9.7436	10.0675	8.28899	9.35454	9.19378	10.7293	12.2605	10.7947	10.028	11.356	10.8187	99.8493	66.1755	82.0299	12.4669	11.0807	14.1905
245663_at	6.36255	5.97351	5.79323	5.72369	5.87374	5.65544	5.96468	6.13616	6.26504	5.9373	4.97842	5.49379	6.79589	10.0505	6.73199	5.86506	5.5578	5.85447
245664_at	7.39356	6.8714	6.9133	6.65035	6.23602	6.47195	6.97778	7.18134	7.18547	5.90544	6.6591	6.6133	8.67783	10.3645	11.37	6.45867	5.51481	5.79156
245665_at	64.4929	55.7898	64.5352	78.769	69.5135	71.6678	73.5739	49.5672	52.4732	66.886	92.5121	72.1374	60.8361	45.9361	76.8672	75.932	73.0559	73.0829
245666_at	76.9683	90.814	81.6249	79.9786	94.7291	87.3456	76.0756	85.3575	87.9071	89.4957	107.574	85.0215	125.99	115.758	114.707	106.051	87.281	102.948
245667_at	539.056	574.423	475.579	488.849	390.056	352.538	419.507	499.363	509.306	375.961	397.105	426.702	759.37	522.015	651.174	493.368	424.36	389.832
245668_at	289.974	313.951	270.099	683.234	958.45	749.962	162.65	157.739	181.769	1190.98	1233.81	1285.34	583.448	411.553	526.494	986.106	1175.24	1100.3
245669_at	6.44078	6.39688	6.3495	6.18779	6.30505	6.00574	8.0471	6.52507	6.63644	6.32789	6.19695	6.13314	7.79399	6.97979	7.94006	6.22348	6.03604	6.3772
245670_at	10.7481	11.0101	10.435	15.368	18.2558	22.165	10.9614	11.1778	11.3462	17.2604	16.4484	14.2276	13.6102	12.2039	12.0114	19.6891	18.4731	13.6376
245671_at	49.6375	43.2116	57.0798	42.4097	38.5523	28.3076	47.3296	63.977	67.3783	35.4956	42.6823	35.2848	62.358	67.5029	65.1934	47.4854	44.0521	48.5346
245672_at	4.5886	4.48627	4.77787	4.34749	4.50326	4.29283	4.47229	4.60862	5.30462	4.41606	5.30669	4.34749	5.00159	4.97842	4.98129	4.3661	4.27734	4.45679
245673_at	7.14984	6.97893	6.64435	6.71128	7.08465	6.75054	7.03361	7.24712	7.28653	6.81546	6.86237	6.79645	7.63963	8.24383	8.05504	6.65992	6.71321	6.5256
245674_at	7.53026	7.27905	7.3796	6.47274	6.99299	6.9449	7.24802	9.59702	7.55505	6.90394	6.41662	6.50206	7.81194	7.98979	13.1572	6.75359	6.32035	6.46796
245675_at	4.72595	4.62797	4.59954	4.51716	4.66998	4.40574	4.56866	4.68882	4.73839	4.57881	4.54806	4.33857	4.89669	4.96393	5.31116	4.48683	4.42823	4.49384
245676_at	10.1014	9.1751	13.7812	8.31508	8.43671	8.18075	15.9592	15.8579	10.0353	10.06	9.7412	8.07458	11.2881	9.56907	10.952	9.06105	7.16984	8.62399
245677_at	59.8471	56.6023	62.884	56.7071	71.8063	81.9542	56.6582	60.8835	48.7313	72.0545	62.9512	93.2369	78.1727	84.4316	75.1994	88.0046	51.7837	53.5665
245678_at	23.294	25.697	22.74	28.3921	28.5699	31.2977	20.0211	17.2009	20.3912	25.3239	41.8069	29.3117	24.5496	24.5334	18.868	28.4715	32.4178	32.696
245679_at	106.376	107.884	88.8747	90.3619	80.7446	96.3578	120.689	112.659	121.759	105.108	107.131	107.846	82.0283	63.6063	74.9774	101.042	87.3545	109.466
245680_at	5.7096	6.31257	6.22936	6.17535	8.37009	9.57891	5.98579	5.90131	6.19135	6.21607	6.30272	5.82234	8.58212	6.48898	6.9861	6.17535	6.09371	5.91588
245681_at	60.0392	81.7491	69.7251	58.9129	54.9189	56.9077	65.3784	68.2516	61.3505	53.0737	79.6312	49.7834	66.132	56.1069	73.4441	80.1366	49.2829	62.5671
245682_at	53.6987	62.7576	64.636	42.3809	51.5143	35.1589	59.5039	40.5269	37.722	47.2956	36.4741	46.8759	39.5289	29.8328	39.6639	55.6136	34.7611	52.8171
245683_at	144.928	108.562	117.085	72.9734	78.9618	78.3737	95.8958	106.407	109.842	85.9238	92.7918	94.2788	81.0419	77.7676	89.1416	59.3684	89.8695	74.2463
245684_at	336.244	374.543	388.091	311.856	311.741	273.185	297.283	310.871	327.143	363.927	416.332	442.228	492.073	510.773	584.276	253.808	325.748	322.632
245685_at	23.1947	21.4568	20.9516	30.9653	25.4459	29.302	20.3077	20.0153	19.273	28.0789	23.891	21.1193	27.3706	26.7624	27.1935	32.2108	27.8721	24.2619
245686_at	565.085	549.203	548.933	670.5	699.162	797.675	565.62	620.873	553.416	565.829	634.747	637.831	861.363	698.387	782.969	626.098	540.786	634.278
245687_at	59.1554	60.7811	49.1838	45.9437	50.0171	41.261	51.6181	51.4276	42.6955	43.7698	49.5326	42.7481	63.161	53.7384	54.1239	51.0152	40.5835	55.0997
245688_at	2047.66	1796.92	1705.12	945.351	1321.99	1154.43	2059.13	1747.74	1990.32	863.524	1282.38	865.637	640.627	607.614	438.799	1135.05	940.355	1142.54
245689_at	841.602	786.239	671.106	157.68	286.947	195.916	2416.76	2755.02	2522.86	516.045	569.139	509.662	2766.98	2154.18	2529.82	791.099	637.49	736.801
245690_at	11.1169	11.5779	10.9718	11.2613	11.0079	13.1561	10.6897	11.0914	11.5385	9.90014	11.7267	12.7769	11.6251	11.6979	10.9254	9.15609	10.3009	10.6818
245691_at	45.5575	57.91	51.262	42.1172	50.8186	53.5797	41.9015	50.5854	51.8284	74.1687	75.447	64.2865	47.8654	46.3741	46.9954	98.3796	66.0736	69.3709
245692_at	5.49627	4.97904	4.96107	4.81254	4.81115	4.71547	4.95781	5.16656	5.19294	4.8387	4.82045	4.66155	5.64964	5.51345	6.6057	5.33828	4.73956	4.79675
245693_at	52.4474	50.7091	67.0125	62.5092	50.6685	56.4467	59.9541	68.2628	38.5475	60.9561	66.3115	70.9021	44.5645	48.7774	44.781	80.3772	80.005	88.191
245694_at	350.099	399.543	394.812	378.332	413.502	403.966	320.058	379.764	348.678	494.118	348.378	440.505	415.648	490.398	393.613	276.004	452.574	481.614
245695_at	21.6183	23.6086	28.8328	25.4203	28.8026	28.8915	34.6485	26.6697	23.4087	19.8838	26.2114	23.2696	13.698	11.6595	15.9989	27.8749	28.4844	31.5462
245696_at	55.0941	54.3154	41.3025	4.73061	10.2635	6.74001	14.1952	11.9799	14.8202	10.4567	7.56654	11.0142	12.1058	12.6766	12.1997	9.93028	12.5543	13.3324
245697_at	34.8813	15.9795	44.9524	35.4388	27.2002	29.4069	36.501	41.4019	47.8192	38.824	44.6836	42.3166	37.4288	17.6664	34.2171	32.6718	35.3762	38.2259
245698_at	89.1013	58.0708	83.5021	92.3356	102.125	75.9413	101.094	101.485	104.432	79.8556	70.0093	75.4764	60.2764	24.8862	33.8585	82.6727	66.1469	79.6328
245699_at	36.4726	29.5729	49.5183	26.6363	36.8354	33.6747	37.6493	45.286	41.3848	26.388	29.9864	35.7355	79.9951	78.782	45.8683	44.8473	43.7627	41.6441
245700_at	5.88364	4.44957	4.5606	4.41606	4.55405	4.77061	4.52421	4.58313	4.65925	4.74111	4.47247	4.40031	5.06464	4.82283	5.1655	4.44975	4.33554	4.34981
245701_at	184.326	152.815	214.133	20.4042	21.0236	17.0168	93.6208	95.9805	74.5046	26.1871	38.649	27.2376	63.5122	114.599	67.1227	38.44	30.3233	28.3478
245702_at	10.204	10.8083	10.5198	8.28423	8.69799	8.03224	9.79657	11.1492	10.4733	9.02094	9.19906	9.35915	37.9224	36.6573	42.6543	16.5797	8.43203	14.5844
245703_at	7.06779	6.47886	6.41267	6.16066	6.48738	6.17028	6.46079	7.99274	6.64981	5.98702	5.89332	5.73828	7.55536	7.32675	7.34181	6.56621	6.02848	6.27044
245704_at	30.1147	48.9943	39.278	66.5517	63.1506	91.1279	35.224	30.281	29.8708	81.1702	53.2834	105.305	35.3268	37.1484	37.2416	65.1291	51.2905	67.5043
245705_at	4.98661	4.92878	4.90212	4.68305	4.8001	4.60162	4.88845	5.19465	5.23922	5.11755	5.86675	4.59558	5.73852	5.64245	5.5223	4.72808	4.51326	4.65409
245706_at	44.6726	52.286	47.5079	52.271	42.5694	56.0286	36.7885	49.7405	51.999	40.0898	78.5623	56.8797	72.7565	83.9647	89.7091	56.2708	52.6222	60.4499
245707_at	5.74418	5.76593	5.53615	5.09993	5.53615	5.12955	5.39029	5.55118	5.63851	5.47824	5.24439	5.18612	6.68706	8.78254	6.89458	5.22203	5.34487	5.01784
245708_at	5.52865	5.28461	5.55962	5.92999	5.52865	6.52212	5.11924	4.78632	5.55894	5.59904	5.67966	5.11882	5.69367	6.79087	7.87671	5.08884	5.48973	5.19998
245709_at	32.869	32.8596	34.3954	56.7735	46.9212	54.2998	31.3138	30.7428	21.2904	30.266	35.7025	40.1137	40.5502	43.023	42.6009	71.5252	41.728	53.4259
245710_at	36.6935	43.5171	30.3445	21.4436	25.0189	24.2081	23.8106	34.4937	29.6898	25.8781	17.3278	31.9735	50.2024	30.142	51.139	14.0649	27.6883	26.477
245711_at	65.2242	65.3825	55.1575	17.8542	18.2817	17.714	80.9272	85.3066	67.7613	30.1996	24.5682	34.8033	284.009	300.334	295.421	12.6865	22.3442	24.2434
245712_at	9.36223	13.1913	11.9976	8.86191	10.8365	8.739	13.0265	9.6061	10.4149	12.4342	10.096	9.61675	9.93273	12.9811	11.1133	11.0559	11.5612	11.3271
245713_at	7.82897	7.05792	6.76442	6.42902	6.86012	6.32633	10.1948	7.32795	7.03766	6.74555	6.58457	6.61167	8.63871	6.79449	7.33156	6.67499	6.4425	7.42369
245714_at	199.19	199.879	214.371	345.91	314.674	383.574	235.786	234.506	223.893	236.247	205.271	248.062	182.608	203.909	215.713	262.406	290.905	265.812
245715_s_at	6619.52	6151.28	5262.92	6123.79	5775.14	5877.58	7591.1	6678.79	5939.47	4956.36	4778.04	5674.49	5957.78	5215.57	5523.17	5599.94	5567.36	4806.38
245716_at	101.585	87.1109	106.082	67.9495	70.0007	72.7295	96.435	88.1783	71.3829	63.7619	53.0694	66.2299	53.125	56.0206	63.9205	47.4513	53.0715	65.373
245717_at	29.8325	30.6498	27.4598	62.3522	44.3239	64.1638	19.5362	26.2437	30.6322	58.5288	51.1133	56.3778	31.0197	34.242	31.8064	30.3442	44.3522	34.8093
245718_at	77.1598	73.2016	81.5997	33.3067	60.2009	50.7987	58.4176	80.9986	61.7601	59.5626	57.9111	39.9016	69.4008	68.7807	61.2095	60.4537	44.0766	56.4132
245719_at	32.8414	39.404	27.1165	21.3408	23.272	22.4679	31.7979	27.0387	32.4218	27.0337	18.6921	24.2878	32.9725	23.0721	27.292	14.4135	28.6063	21.815
245720_at	4.7147	4.62113	4.6333	4.46752	4.62113	4.48241	4.63977	4.76728	4.83354	4.57204	4.53351	4.37723	5.05239	5.14622	5.46745	4.55779	4.35857	4.45268
245721_s_at	59.9504	75.9289	77.7437	64.8275	56.294	62.9797	44.7865	52.7672	35.6871	63.2285	73.4441	62.0042	46.4561	41.0025	56.4051	91.2403	64.4929	91.9099
245722_at	67.8281	68.2516	71.5237	63.775	76.0272	96.2727	85.6631	68.3427	57.2007	56.7246	47.0621	48.089	68.4299	40.8134	51.871	78.5397	71.5914	68.2698
245723_at	19.0018	20.6051	23.9008	20.1431	21.9219	27.6826	20.6017	17.6461	21.0742	21.9976	21.276	22.5577	14.3461	15.4471	26.9289	19.3929	27.2114	25.5874
245724_at	108.263	108.637	109.3	57.369	55.9746	51.0466	132.057	118.235	94.8342	61.4413	43.2107	58.6846	157.311	145.071	155.586	75.9679	76.4704	73.2016
245725_at	61.2297	42.7376	65.4106	32.9725	29.8904	32.8893	56.2801	54.5412	58.5149	33.4472	36.9491	37.089	26.4129	49.3477	31.9971	56.7537	39.2764	36.8717
245726_at	11.8109	17.5831	16.9672	11.3915	10.7337	10.6529	15.2372	11.2724	11.3915	10.9961	8.93098	8.34777	11.805	12.1439	11.9259	10.3085	12.7402	10.739
245727_at	22.3134	21.697	21.6631	21.2751	26.1001	26.3891	22.0474	22.9041	14.8766	28.1216	17.5326	28.6981	16.9979	25.0992	20.8786	26.4401	22.4053	25.1425
245728_at	25.0714	22.9974	27.585	34.1483	45.7948	42.9558	43.385	35.3588	45.3922	56.5094	50.5864	53.1479	18.5422	17.2731	9.07074	59.2332	53.4786	49.6803
245729_at	159.157	195.51	165.968	250.123	197.772	231.868	131.451	137.906	159.977	169.886	197.301	179.263	118.175	161.701	114.467	237.692	189.213	226.111
245730_at	58.4969	70.5042	76.7268	45.479	56.1773	54.8141	43.9148	67.9062	60.4736	45.2182	67.6264	49.4766	40.6035	46.4437	37.6485	51.3928	44.1246	49.5427
245731_at	41.4248	44.691	35.0436	92.3204	76.4673	71.2349	47.0418	41.9101	48.9179	64.2747	68.5001	58.2416	76.962	80.0543	78.4526	57.0294	71.7518	55.8517
245732_at	45.1115	46.8634	55.0782	50.084	47.8477	44.2007	45.3894	26.9372	37.8656	42.1856	56.3414	47.2733	38.8927	35.0399	36.8453	63.5109	38.5594	39.7642
245733_at	18.8154	16.9199	18.7968	46.0107	48.8115	50.6519	29.8855	20.7674	21.5894	57.2289	66.2639	52.791	15.1561	11.8882	13.9653	52.6287	49.37	49.4898
245734_at	85.7176	84.5843	135.963	13.8556	21.7461	26.8483	90.7022	98.6081	104.52	18.4974	20.9999	25.9804	204.404	253.521	199.481	17.5434	27.832	21.546
245735_at	5.7443	5.46812	5.76877	11.4714	6.24012	8.00325	6.23602	8.57049	5.78693	5.21314	6.4128	5.29504	6.13062	6.58349	6.34767	5.31389	4.97679	5.40381
245736_at	233.934	184.337	201.872	286.888	616.717	361.877	86.3875	91.9005	95.5714	2097.55	1854.05	2054.36	884.327	724.466	855.527	1210.94	862.355	864.216
245737_at	51.1337	39.5256	41.1332	28.4166	19.5955	25.5727	50.5978	36.4561	37.0951	37.2355	38.7269	35.6248	39.8754	24.1545	38.44	58.4477	49.0386	57.0224
245738_at	5.97056	7.65785	5.93901	12.1984	7.53738	9.16399	7.39933	7.8499	7.30901	7.20202	6.61711	6.43272	10.0315	10.0134	8.56979	8.63339	7.65753	6.74998
245739_at	34.6243	35.9076	27.8149	36.486	38.5206	46.2942	39.0592	35.3413	42.699	36.3843	34.7311	24.8662	25.7466	26.8825	25.5286	42.2593	38.4874	42.086
245740_at	400.834	320.802	308.981	226.241	209.405	180.427	412.188	381.868	368.644	152.148	162.644	183.145	338.816	287.974	329.401	155.088	164.647	186.765
245741_at	4.66787	4.57749	4.52626	5.43676	4.66557	5.37547	4.57242	4.70812	4.77964	4.54619	4.78887	4.55648	4.99338	5.05778	5.0022	4.38227	4.49698	5.23858
245742_at	562.815	617.604	523.11	284.833	382.622	330.934	508.314	560.45	749.054	397.562	396.225	388.745	750.208	607.677	653.277	368.803	448.346	534.437
245743_at	18.617	17.9458	20.8726	23.1833	19.5995	18.5727	17.7129	20.3929	19.0518	18.4026	20.3235	17.1924	22.3006	25.094	19.4041	17.2873	16.7298	14.2393
245744_at	11.8934	10.8361	22.4218	7.02062	7.36325	9.06477	9.31619	13.1556	8.839	8.15877	8.08819	6.82891	9.25592	12.7444	8.67961	7.34965	7.88011	8.03702
245745_at	31.1585	30.2294	40.0264	13.2377	15.5164	19.2647	21.9764	31.9138	21.3886	17.6153	21.8895	16.9815	19.5678	27.2881	23.5834	20.7397	13.1867	14.7141
245746_at	629.864	582.143	588.733	529.792	414.574	466.983	552.189	635.086	710.832	647.919	658.112	711.066	449.443	421.927	487.406	575.345	470.681	463.734
245747_at	25.1002	18.8479	19.7596	18.8216	20.5392	24.1713	19.7807	21.1905	18.1638	19.7661	16.9853	18.2236	23.8038	15.869	16.4599	16.7188	14.6264	21.9552
245748_at	193.358	250.833	231.458	95.2657	132.218	110.104	206.082	239.87	211.085	151.783	128.962	167.567	158.388	178.4	153.595	128.346	176.806	181.62
245749_at	8.01642	7.83733	9.2681	7.75408	7.72166	7.77896	6.79171	7.99701	8.65362	7.61769	7.98749	7.29311	8.86082	8.3512	10.762	7.50926	10.7474	7.54792
245750_at	1372.91	1458	1461.75	981.58	929.353	1059.73	1575.97	1441.03	1285.1	924.347	850.551	1110.45	1457.32	1224.77	1302.91	1534.26	1253.71	1451.67
245751_s_at	80.107	66.2027	78.53	93.9714	103.389	93.1375	64.5565	76.5867	62.813	121.917	135.653	114.033	103.172	68.7807	63.2753	138.133	105.439	98.6001
245752_at	10.9619	10.0679	9.7825	8.48711	9.51225	8.12149	9.79094	9.70087	9.70964	9.56789	9.98632	9.59072	11.4808	10.2507	10.4505	9.10321	6.97778	8.45093
245753_at	10.5181	9.72681	9.78773	8.73326	9.12343	7.6191	9.6615	11.127	9.87658	9.30472	7.99619	7.60159	14.984	16.5307	15.7253	8.61107	7.88011	7.88966
245754_at	17.848	20.0795	21.9268	18.0048	17.1402	18.798	22.504	29.0241	23.3765	26.1334	33.527	20.3177	29.4396	32.7955	33.2732	21.8427	17.8605	22.5377
245755_at	6.90422	6.72231	6.55745	8.41508	6.81042	6.5074	6.70026	7.5411	7.02524	6.38061	6.625	6.52668	9.22176	11.3344	11.4876	6.85224	6.09196	7.10621
245756_at	189.913	172.148	168.787	172.941	158.251	145.107	160.292	176.298	182.218	177.811	182.458	169.795	259.362	177.636	257.177	193.131	176.566	205.068
245757_at	67.589	77.982	71.484	105.692	116.629	110.769	66.2067	61.1656	76.1428	130.937	120.947	124.373	37.0608	34.3982	49.6212	62.1789	84.7217	76.5694
245758_at	20.6314	22.4527	14.7959	24.7343	12.1003	12.8932	16.2887	12.1526	9.95662	14.4945	15.1826	14.9591	19.492	14.5889	14.8355	17.5035	17.0451	15.5851
245759_at	130.848	114.185	108.492	78.7221	87.1842	92.5577	121.395	146.671	131.413	116.339	116.78	98.7277	105.162	84.1149	86.6985	90.6314	103.904	122.396
245760_s_at	9.95846	9.47092	10.2153	8.66216	12.9955	8.96148	9.2902	10.1172	9.94048	9.27762	9.15045	8.93942	11.7161	13.5851	11.5812	9.21684	8.89035	9.00576
245761_at	32.3965	37.4118	43.4992	27.8046	28.9812	27.5782	34.317	29.1819	38.5855	36.9825	37.0053	31.613	38.2557	27.2326	28.2513	53.5863	30.2859	35.169
245762_at	10.8156	8.54377	8.15692	8.39126	10.0718	11.7827	8.95062	8.96405	8.97142	7.87768	8.4452	7.09251	8.66821	10.6347	9.03763	12.7929	8.94897	11.3223
245763_at	91.1279	134.698	122.14	118.175	138.536	107.327	96.9793	122.807	103.891	141.568	156.364	167.557	69.1461	95.2344	72.4076	190.523	154.088	146.214
245764_s_at	40.6971	54.2374	51.935	35.8016	32.4992	44.3563	37.0068	41.9187	33.6899	50.0089	34.2649	55.1631	38.1365	40.4936	41.2762	21.0267	40.8914	39.6199
245765_at	35.2833	31.5326	31.3621	14.9109	15.1132	19.9112	26.2642	28.7878	27.8675	25.3135	21.648	24.5839	182.604	147.486	210.254	23.5209	18.8378	25.8255
245766_at	6.48525	5.82832	6.09521	6.48365	5.82449	5.80014	6.32425	6.42427	6.21352	6.22629	6.56297	6.54816	6.97721	7.15542	6.995	7.96325	8.19555	6.10172
245767_at	5.78871	5.73852	5.58962	6.50981	5.63851	6.96718	5.58136	5.76782	5.94487	5.45376	5.93608	5.95415	6.36674	6.29625	6.61494	5.47869	5.44593	5.58503
245768_at	280.669	249.416	259.064	250.952	321.6	331.308	295.045	298.305	248.464	429.27	415.939	522.53	1054.72	1222.11	1379.1	179.923	333.493	255.702
245769_at	22.0773	16.7987	14.7871	15.6425	21.5575	14.0124	11.6282	12.2391	15.8801	16.3199	19.0276	19.277	17.2271	17.9967	19.6725	25.3979	20.5443	18.2453
245770_at	12.2275	15.2962	12.6792	29.6507	34.2523	46.9472	14.6234	14.6126	11.5646	20.3227	22.5234	18.7506	15.9435	12.6495	12.3878	25.424	23.7062	28.7996
245771_at	13.9837	16.6366	17.1438	22.9163	20.256	16.9387	16.9428	15.4116	9.5569	22.4403	22.9634	18.7729	18.38	17.9694	34.4611	18.2551	20.1332	16.5297
245772_at	33.527	32.7135	36.7734	50.0336	43.6989	58.885	46.3675	38.3659	42.7965	52.9605	42.1882	53.393	26.6111	18.5506	22.5586	57.0622	51.3759	52.2216
245773_at	45.3158	51.2042	44.8417	46.5249	45.247	41.9428	42.7833	42.6429	34.6998	40.3889	36.1652	31.0978	28.9479	35.7671	55.6959	42.2836	40.6436	45.2526
245774_at	18.4769	14.5718	15.503	21.2515	19.9767	17.478	14.0118	10.7571	11.8312	14.0135	10.7126	15.0426	11.302	11.5783	11.5836	14.3367	12.0282	12.3873
245775_at	225.11	267.499	309.775	189.672	218.514	238.435	245.795	230.652	179.492	289.201	273.544	292.848	232.363	253.746	282.636	398.495	372.12	435.915
245776_at	58.6569	61.1266	51.491	8.33201	7.87606	5.80967	52.8366	46.772	71.4811	13.7459	11.3095	14.7489	20.4365	18.1862	14.1553	23.8082	19.1082	22.7325
245777_at	55.4084	46.8028	56.3402	22.9738	25.5528	21.1223	41.0226	35.8171	29.9654	27.6156	26.0878	23.9008	58.9746	52.8855	60.0515	43.3458	28.1037	37.9255
245778_at	34.8805	30.4187	27.9322	27.1349	30.1587	27.3329	21.5146	22.6147	34.2052	21.375	19.348	17.0514	20.2739	27.4731	18.4249	20.2256	20.0536	17.6747
245779_at	6.23525	6.01982	5.96199	5.80943	5.89429	5.43855	5.97694	6.38559	6.27972	5.59835	5.82281	5.77067	8.22016	8.63906	8.77029	5.67779	5.62394	5.77921
245780_at	904.588	876.479	959.297	702.934	786.368	786.74	887.638	804.057	862.336	893.417	876.226	999.276	671.423	592.14	608.801	942.655	780.191	827.766
245781_at	186.596	174.454	178.66	183.963	204.53	217.725	141.702	165.267	182.068	375.961	303.004	297.87	169.886	204.412	203.207	244.686	222.938	246.421
245782_at	11.1919	10.8314	9.24243	13.5099	10.0416	9.80563	10.857	11.4619	10.3767	9.85854	10.2065	8.97603	16.4842	14.0999	14.4224	11.0996	9.71183	10.5
245783_s_at	79.8146	60.2888	75.1902	15.0126	16.5276	15.5566	67.7404	55.1201	70.6811	21.2045	20.2876	17.4271	75.0992	60.1107	69.1547	33.7633	22.1572	24.2668
245784_at	37.0692	50.255	45.395	40.2912	29.9402	38.3281	36.2083	33.7661	41.9385	23.9933	28.0916	22.6473	18.3766	26.5249	15.1346	19.5919	24.1932	21.4564
245785_at	4.42369	4.33536	4.31794	4.3222	4.31883	4.13142	4.31121	5.05841	4.56997	4.21871	4.18179	4.16875	4.57655	4.82521	5.03912	4.31121	4.0961	4.13532
245786_at	41.2491	38.0817	51.1495	48.6134	45.5491	50.2436	33.848	47.6329	42.4175	58.792	47.7819	46.5726	59.1846	61.0213	60.3879	45.6803	41.2745	64.5803
245787_at	296.844	309.292	372.579	237.321	223.103	269.44	306.358	291.204	264.288	280.831	212.835	266.446	294.367	266.578	277.163	277.05	276.368	283.59
245788_at	89.6244	85.1596	75.9195	50.4111	51.8135	54.4316	107.782	106.922	102.551	58.244	62.2109	56.7234	121.837	126.514	139.921	51.3305	54.4405	57.72
245789_at	110.448	113.358	140.139	31.959	60.3061	43.122	141.115	140.001	138.613	64.2892	59.8274	60.8436	109.172	118.383	125.474	75.3943	79.2559	85.8603
245790_at	164.363	191.013	190.762	108.034	106.451	89.6594	138.434	140.921	131.438	75.1917	78.4607	72.7908	106.25	121.9	102.963	69.0907	71.0216	62.5272
245791_at	507.073	535.547	422.516	891.054	748.962	697.985	647.36	744.881	773.188	571.975	668.795	596.89	394.164	348.278	422.794	550.084	532.235	642.512
245792_at	865.531	676.796	836.398	192.345	218.16	207.778	735.713	833.303	712.367	271.445	316.931	321.161	693.897	675.019	623.275	466.193	345.165	415.153
245793_at	54.1106	48.3565	51.5418	54.4942	49.1757	48.8576	49.2242	61.4944	75.7311	35.4242	40.2102	44.9266	32.1526	36.6445	26.5729	51.7433	41.5023	39.7299
245794_at	615.907	687.923	622.955	336.057	393.008	370.975	580.532	504.445	539.189	620.07	635.647	615.781	764.912	797.462	721.289	724.898	773.935	794.339
245795_at	139.777	117.748	146.334	69.22	72.7385	61.5828	100.967	114.035	96.087	68.6988	67.4378	57.4928	102.288	107.698	109.051	80.1168	58.3769	75.3819
245796_at	624.865	600.567	656.869	357.386	350.718	396.03	523.733	598.486	551.328	391.726	301.663	373.56	835.505	802.868	819.95	369.561	440.704	456.476
245797_at	97.0071	94.7388	101.391	49.0406	51.0529	56.8844	92.0648	66.2054	81.9677	58.0553	74.7621	61.5474	62.8194	68.9702	64.8648	47.5137	45.234	52.4624
245798_at	13.2508	12.3165	10.739	17.9023	17.8564	11.5612	12.3064	14.0259	11.363	12.962	14.1861	10.0324	16.8561	15.7897	16.1385	19.1775	15.6521	12.233
245799_at	6.98839	6.8497	6.84576	6.62391	6.85364	6.52346	6.83958	7.08261	7.31321	6.46663	6.53526	6.53311	8.07425	7.75121	8.26757	6.55219	6.4584	6.43193
245800_at	13.3705	11.8695	12.9691	22.6393	13.373	12.783	13.0751	12.8773	15.1098	12.7118	14.3883	15.541	6.90266	11.649	11.2599	15.6579	10.3611	13.2225
245801_at	6.49245	6.45999	6.43272	6.67855	6.18538	5.68526	6.41688	6.65445	7.83959	6.75484	6.15914	6.10323	7.72133	8.24315	8.0716	5.96174	6.0374	5.72004
245802_at	3.86084	3.81339	3.80713	3.69664	3.85371	3.65992	3.78406	3.86195	4.05409	3.78033	3.78406	3.71933	4.04029	4.14808	4.10553	3.70926	3.71719	3.67982
245803_at	4852.01	4719.33	5544.08	1268.61	1653.22	1398.21	4284.18	4318.27	3915.43	1536.15	1568.57	1759.99	4760.41	4000.46	5024.21	2157.55	1831.23	1973.63
245804_at	4.62436	4.03697	4.04344	3.99589	4.1338	3.92254	4.03614	4.16174	4.50289	4.02389	4.39453	3.97036	5.22783	5.68572	4.94134	4.69711	3.90839	3.92077
245805_at	9.55022	8.87539	8.9895	7.82575	7.8929	6.89261	8.95265	12.8158	9.11518	8.41629	8.03785	6.7754	13.0517	15.489	14.0788	8.37524	7.4417	7.09455
245806_at	102.859	80.6418	100.644	36.7251	32.2121	34.9243	62.7704	60.8036	50.1179	30.0789	42.1951	36.0451	46.4485	72.5028	47.4318	29.9224	36.8037	30.5973
245807_at	43.2018	40.9856	47.6897	36.6769	32.8346	29.9605	39.4073	39.3103	41.545	44.5425	36.6769	41.0969	34.6471	53.5159	42.6937	29.6812	44.9838	42.8307
245808_at	7.81162	8.93318	9.09498	17.1953	10.5423	15.1355	10.4205	8.32448	9.05324	10.8045	13.6057	11.4949	8.97216	8.41525	9.37762	8.95265	10.5397	9.86199
245809_at	266.742	242.864	258.379	101.091	139.484	122.002	321.342	328.793	343.877	154.716	165.777	157.182	243.623	267.455	249.764	189.182	168.995	201.996
245810_at	84.5218	80.6517	87.4659	47.4357	59.4233	51.6647	99.1544	143.801	89.345	68.2852	48.4758	61.555	53.2462	53.0737	45.7798	48.7954	48.7654	49.1808
245811_at	13.0431	14.9327	12.6163	11.878	12.2205	10.1314	12.5646	13.9132	14.1728	12.0549	11.5432	11.085	18.5727	18.6565	17.276	11.0709	8.2924	9.60255
245812_at	7.73372	7.6569	7.60143	9.65594	7.38962	6.896	7.34845	7.97241	7.82881	7.37052	7.08596	6.94233	9.51889	9.88226	9.71323	7.21238	6.19517	6.9861
245813_at	5.42762	5.24827	5.22396	5.14453	5.36444	5.02816	5.3293	5.44235	5.57884	5.29613	5.1401	5.31706	5.92853	6.42216	6.38087	5.08612	4.93485	5.73498
245814_at	4.40664	4.28983	4.29124	4.23034	4.34445	5.73546	5.07235	4.13006	4.41352	4.17286	4.17955	4.13923	4.40628	4.52737	4.25229	4.26436	4.25543	4.47321
245815_at	25.0477	23.7198	21.8958	16.5984	17.8114	17.1107	21.8428	17.6743	21.8805	19.3889	17.7434	18.9659	15.6418	18.2761	12.3878	26.9688	17.1529	20.0145
245816_at	13.6303	11.2013	12.0872	11.5243	11.1096	9.37936	14.9637	13.1467	13.0571	10.9178	10.163	15.991	17.036	20.965	19.9898	13.8789	9.22859	18.0775
245817_at	42.7095	55.297	62.6313	66.7104	48.5256	66.5025	74.9096	45.3568	33.0226	55.1291	61.1166	63.8995	36.0066	38.0316	36.483	51.669	66.4861	51.9755
245818_at	36.8233	37.4703	34.4074	66.6611	62.2415	56.3055	52.98	61.1116	75.7015	78.4478	66.132	72.5386	25.2782	20.6823	37.1843	52.2442	68.6734	46.4867
245819_at	4.08333	4.00032	3.99835	4.28473	4.02538	3.83114	3.98916	4.10014	4.1503	4.00888	3.92899	3.88406	4.18041	4.26681	4.36789	4.40176	3.92738	3.95133
245820_at	5.84798	6.53983	6.5173	8.24282	7.52934	6.94804	6.48685	6.5495	6.70577	6.49592	8.2232	6.93549	6.88949	7.43529	6.94404	6.03641	6.52212	6.38009
245821_at	395.892	375.46	485.557	1078	996.879	1171.46	502.212	499.968	456.561	1276.79	1478.33	1371.05	426.676	437.683	447.353	943.122	830.833	910.348
245822_at	531.47	720.711	565.922	534.36	597.552	611.056	522.916	491.568	460.223	650.426	654.607	615.465	494.301	640.615	544.039	361.29	654.338	642.987
245823_at	16.6448	14.0707	9.39613	16.4558	15.8664	17.2604	13.5266	16.2877	13.5444	15.9134	15.9265	14.2264	13.1227	20.331	16.4937	19.3881	19.2437	12.5708
245824_at	5.5949	5.48477	5.27139	5.46183	6.03418	5.52661	5.46049	5.62625	5.39405	6.16471	7.54451	5.39494	5.94072	6.28256	6.88779	5.47711	5.97203	5.43945
245825_at	115.886	144.619	109.583	88.9313	104.096	98.9876	125.057	149.364	127.694	112.195	112.648	109.905	115.577	107.069	124.258	102.374	94.1008	114.274
245826_at	7.18074	7.07883	7.1068	6.62527	8.10349	6.28179	7.70771	7.80713	7.31051	6.7306	6.60896	5.96639	8.72429	15.8664	14.5934	8.10682	6.18652	6.47354
245827_at	5.5832	5.5382	6.33829	5.40159	5.5473	4.78809	5.97621	6.55004	5.74477	6.03219	5.3541	5.01908	6.73794	6.67608	6.91103	5.06236	5.34597	4.99461
245828_at	48.5425	61.9775	58.0493	79.0251	90.8644	101.539	71.061	65.6125	60.243	50.2839	56.9253	50.0408	17.3047	32.8798	24.3572	94.2014	69.9906	73.6162
245829_at	12.2077	10.5101	11.1217	7.73229	15.7401	9.36088	10.4687	14.4049	11.1042	9.16719	8.98895	10.0904	20.5084	13.7934	16.2209	9.66527	8.40126	7.91677
245830_at	50.8541	53.4413	40.8226	42.4297	40.0338	38.358	42.2957	41.6903	61.9634	73.0529	56.6652	66.4779	48.8958	43.4795	49.3518	51.4107	47.4962	51.3959
245831_at	28.0997	33.8161	33.6387	16.5304	25.6105	21.5903	25.9004	22.0012	21.7693	27.6554	25.559	29.4323	29.2587	25.6211	28.3245	30.4306	17.0147	22.3474
245832_at	501.377	494.992	516.3	629.088	585.742	578.425	549.677	624.71	548.617	644.468	608.401	573.786	746.934	762.433	769.545	821.146	635.399	697.069
245833_at	4.98927	4.8987	4.81906	4.76924	4.89468	4.76669	5.68619	5.01352	5.11839	4.82402	4.70039	4.73255	6.11326	6.49645	5.66637	4.40302	4.30537	4.25876
245834_at	4.94967	8.14956	4.8159	4.75047	4.87321	5.16041	4.84666	4.95883	7.91336	4.82897	4.79202	4.71393	5.09637	5.76688	5.16041	4.75828	4.80365	4.71761
245835_at	13.3412	10.7868	13.6427	9.62743	9.32844	8.86009	12.3299	11.4318	10.6365	8.8763	8.85227	8.12916	21.4974	16.0859	15.6158	8.64936	7.03303	8.8783
245836_at	11.9566	11.231	10.9943	8.73272	9.33611	8.08803	10.972	12.7919	12.5483	10.3737	8.70496	8.8263	15.1526	19.717	18.1571	11.3672	7.42323	8.31799
245837_at	9.2841	9.07521	9.1193	7.8942	9.03875	9.05882	11.3067	9.88226	8.11115	11.6423	7.72673	7.62833	12.8876	10.3987	10.3204	8.34228	8.40281	8.16195
245838_at	38.3548	28.9158	32.35	47.2393	51.221	43.8706	24.6273	24.6061	23.3074	60.9611	54.4003	39.349	33.3033	34.9286	38.5554	55.5063	44.495	48.6873
245839_at	7.39417	7.52594	7.38567	7.26411	6.82274	7.20942	7.4301	7.68305	7.25517	6.83565	7.5793	7.26411	8.21172	8.74942	9.03541	6.61956	6.21429	7.28324
245840_at	15.1256	14.4478	9.31466	26.5576	22.1463	28.8482	20.1962	15.7534	21.1158	20.1398	24.9583	19.6641	20.9671	21.4638	25.5391	19.8214	19.1901	19.4216
245841_s_at	4857.29	4890.93	5764.36	9237.24	6200.61	7145.53	5830.08	4984.13	5484.62	3389.91	4158.64	3838.28	3633.23	4194.23	3616.04	5744.5	5523.28	5085.98
245842_at	4.34802	4.2842	4.28314	4.29759	4.31068	4.16259	4.32647	4.42915	4.48664	4.2488	4.29759	4.1474	4.73936	5.09846	4.85323	4.29759	4.92776	4.18265
245843_at	42.7306	31.5229	40.2829	40.8755	33.7502	35.7921	37.7321	43.1176	39.4834	48.9993	47.3549	46.6799	30.3451	23.7106	24.8862	37.0684	35.3747	31.7399
245844_at	33.1504	32.4711	31.8633	34.3058	35.4344	41.1661	33.8425	36.256	29.0503	31.1266	30.0783	31.9761	32.8468	22.1709	25.2865	33.4733	37.1668	38.0332
245845_at	44.5169	42.9594	38.7412	20.5147	28.9753	23.7164	26.5631	22.275	20.5025	28.1505	30.8459	28.9634	38.2211	42.2853	19.2647	23.7701	32.2438	29.5371
245846_at	6.22578	8.74439	7.0163	6.5797	8.00786	10.3051	7.802	6.84661	6.38323	6.97205	7.40724	6.31594	7.13312	7.27994	9.10209	7.35328	8.05636	8.69781
245847_at	5.83718	5.89235	5.87302	8.84009	5.71687	5.69157	5.86338	5.99785	6.06424	5.63295	5.79633	5.36092	6.06649	6.84464	6.23525	5.79633	5.71335	5.72063
245848_at	55.807	52.3527	58.9952	73.3807	88.5121	83.2093	52.0877	47.1414	58.5991	68.3076	39.783	60.7836	41.0311	39.7111	50.1797	50.7268	76.4201	67.3783
245849_at	58.4537	52.3355	63.5422	103.654	98.1112	97.3365	64.6095	40.9435	53.724	49.6497	50.0593	45.3577	23.3069	37.7453	27.1985	74.8619	63.1908	80.3425
245850_at	7.02379	6.26118	6.95775	7.74389	6.93891	10.8865	7.14368	7.72102	7.12726	11.6815	7.04807	7.68211	6.94746	9.59426	9.60846	4.53091	13.099	5.50305
245851_at	55.7417	63.5892	74.3791	77.5841	100.248	94.4667	63.6794	69.2001	51.0938	83.8991	115.834	93.5611	60.5531	58.7268	64.7955	120.706	92.1934	145.444
245852_at	511.319	474.798	494.626	211.606	256.386	223.746	350.415	387.342	432.26	168.026	206.175	198.162	242.654	293.232	262.427	161.323	174.468	144.821
245853_at	196.929	174.554	195.317	243.054	211.858	240.126	239.201	264.049	282.172	190.015	159.622	205.279	189.797	171.203	155.487	194.548	220.516	237.38
245854_at	290.827	318.269	310.01	589.495	442.327	495.857	519.523	489.925	611.307	114.863	159.439	166.459	623.98	663.555	689.408	161.035	275.988	299.207
245855_at	101.495	99.7428	102.606	64.342	66.93	74.6608	126.394	122.842	134.069	73.4743	82.841	56.7607	204.681	148.887	143.465	85.8339	70.3466	93.1872
245856_at	6.77554	6.35289	6.66896	5.77731	6.37904	6.79812	6.47407	6.93264	7.27994	6.57214	6.48898	6.27663	7.54978	8.81001	9.96419	6.1556	7.11527	6.30505
245857_at	9.68892	10.0592	9.26391	9.57615	12.0243	8.36631	9.0028	10.2422	11.5726	11.4723	8.56169	9.69489	14.8254	11.8868	13.0651	9.52593	8.41594	9.65713
245858_at	11.6509	11.4893	11.2872	14.1838	11.2724	10.9601	11.3953	11.0923	11.7094	11.2872	10.9578	11.0065	13.599	12.5275	12.1734	10.9556	10.9826	11.0987
245859_at	35.679	30.8022	26.6461	51.4392	74.1458	58.299	26.1608	23.2515	27.3796	35.4599	46.2666	58.8923	10.6529	13.0407	17.2246	47.3598	48.9852	47.8378
245860_at	5.47554	6.09371	5.22203	5.38697	5.45175	5.2347	5.40914	5.58778	5.56785	5.38055	5.48319	5.29004	5.71312	5.70514	6.30531	5.31334	4.90353	4.99338
245861_at	37.8975	31.0646	45.182	124.851	139.347	110.949	23.9588	28.0766	28.3105	61.8287	71.5296	63.4236	27.585	25.7583	26.7064	129.044	106.457	105.378
245862_at	490.458	453.486	440.342	403.883	373.069	455.277	441.719	513.128	446.609	473.065	349.108	451.701	451.701	394.828	347.677	176.356	418.767	310.973
245863_s_at	35.8546	38.2431	35.0277	34.5987	52.9822	32.6799	34.9071	35.9254	27.9294	31.2104	41.929	28.6016	37.7996	46.7605	36.8824	34.5362	33.5022	38.5935
245864_at	40.2614	30.6602	36.6009	23.4683	24.6162	29.3623	34.8226	37.4211	31.2952	32.9955	24.3437	30.6476	23.1928	25.6053	21.7514	18.8576	23.7052	27.8812
245865_at	5.53115	5.56671	5.56031	5.64175	8.22253	5.44459	5.17867	5.74394	5.80014	5.60503	5.60572	5.4895	6.08121	6.15256	6.13641	5.51821	5.87206	5.48049
245866_s_at	248.342	217.725	243.924	103.141	151.624	112.574	337.406	286.423	304.214	291.443	292.342	267.351	535.635	469.831	607.702	228.347	201.635	210.453
245867_at	388.537	449.536	449.757	359.853	349.424	344.309	484.909	503.379	359.425	388.849	243.308	338.135	279.524	275.263	226.037	281.096	432.971	365.41
245868_at	954.267	913.232	1109.56	936.174	1105.69	1117.24	631.574	936.423	839.772	1842.02	2156.92	1786.65	1151.32	1282.38	1106.24	1206.65	1088.34	1057.28
245869_at	4.24967	4.42078	4.1503	5.45018	4.63539	6.34585	4.42951	5.15638	4.33857	4.77022	5.6154	5.11882	4.54974	4.60559	4.89468	6.32295	5.83934	5.85399
245870_at	91.083	94.1182	92.4172	108.903	111.254	110.662	106.698	111.685	93.3788	101.316	107.428	131.711	93.2792	97.1747	61.5247	91.6912	96.2292	89.1801
245871_at	31.0155	24.4429	28.0455	79.0381	46.8038	74.7145	23.2787	26.7514	22.3878	33.1007	32.3739	51.6945	16.2266	20.5721	19.9525	56.5013	45.6934	36.634
245872_at	38.3115	36.0821	43.6603	73.0604	80.051	84.633	41.0328	31.0378	30.4819	78.4268	89.0702	85.598	39.4332	39.8238	42.8976	78.4622	43.1504	82.4099
245873_at	19.1562	14.5742	18.9185	37.3144	38.8543	53.6777	28.8292	18.2746	19.5344	39.2667	29.6002	34.5952	18.7221	24.1163	11.021	36.3768	34.5462	38.2919
245874_at	36.3567	35.219	53.4412	22.9649	15.1581	17.8931	97.0692	86.8788	106.454	14.7022	34.7007	17.273	68.726	97.3362	50.4524	36.3256	14.2089	28.5459
245875_at	8.88487	7.7074	7.64182	7.02206	7.9698	6.95632	8.31628	9.00687	8.76021	7.58584	6.98811	6.89289	195.55	160.204	180.958	7.80585	6.83397	7.03795
245876_at	32.0721	34.6087	42.6771	19.2208	27.9328	19.1558	29.4226	27.3543	18.5323	21.5566	19.5573	19.2374	20.4996	23.4602	20.7947	24.0456	18.575	19.7738
245877_at	7.35811	8.23875	9.71642	7.28712	7.38233	7.23344	7.31652	6.90536	7.51945	7.31652	7.34121	7.20438	7.85829	7.77768	8.85063	6.64489	7.02264	6.29496
245878_at	26.9533	25.1477	24.0238	24.0821	38.9262	34.5008	21.0829	19.6495	30.2648	30.0517	26.2496	27.8812	20.2647	21.1888	25.3895	25.7012	27.5986	32.6651
245879_at	17.3346	15.5429	13.0622	79.4466	58.3302	67.771	20.3018	14.9542	20.0272	46.3922	40.0511	45.7215	26.9959	18.648	16.2603	64.9301	56.2096	51.8998
245880_at	5.0686	5.0608	4.9627	4.86022	5.07381	4.66692	5.03012	5.30419	5.43967	5.02651	5.16996	4.83632	5.59858	5.61344	5.63272	4.86821	4.7667	4.88323
245881_at	76.11	82.6371	86.727	36.2805	38.6411	33.0864	66.4001	58.6485	50.5905	36.5919	34.6834	39.9188	63.0158	52.2624	61.4539	33.2199	41.4172	34.844
245882_at	6.14297	5.90107	6.0218	8.20498	6.03765	5.86001	6.0013	5.91466	5.58182	6.65118	5.90398	8.14588	6.65445	5.92731	6.68377	5.38277	8.32722	6.0518
245883_at	14.7477	15.7576	14.0637	19.5995	28.9765	15.21	15.9006	17.0367	14.2624	17.1656	13.5224	21.021	21.3092	19.9116	24.0609	13.9604	18.4117	14.4458
245884_at	36.4741	28.5957	41.0614	35.4722	42.2801	52.8887	44.421	34.4166	35.7737	36.1251	40.7263	31.6214	35.5802	39.5744	28.8387	67.2773	45.2749	41.9893
245885_at	2029.45	2090.88	2097.25	1277.29	1354.45	1438.88	1924.55	1917.05	2144.29	2258.94	1468.01	2227.06	2036.8	1841.94	2056.98	658.571	2110.04	1478.54
245886_at	427.844	423.49	451.089	1413.63	848.301	1214.7	501.728	486.946	481.634	549.046	489.071	550.558	292.451	344.932	401.996	452.277	585.742	592.153
245887_at	99.7017	125.923	109.707	120.813	159.668	118.766	105.205	90.9671	91.8759	136.033	127.178	141.191	171.059	151.226	164.894	178.62	145.235	143
245888_at	103.27	98.1072	89.9324	187.218	156.622	175.915	152.01	145.896	128.101	134.953	124.836	130.156	73.4441	58.9468	81.022	137.076	127.173	147.826
245889_at	22.0827	16.5008	16.9585	26.65	23.3765	20.6933	19.2015	18.06	26.0306	25.6743	25.7392	26.9472	46.0609	34.2129	54.2552	35.7311	25.5633	26.2755
245890_at	6.4478	6.41056	6.35837	5.99588	6.31464	5.89235	6.38848	8.03752	6.84492	6.05031	6.01759	5.77446	7.22691	8.99726	8.85136	6.26915	6.06649	5.83
245891_at	525.22	489.251	583.508	453.999	531.656	461.558	446.976	454.68	463.172	933.984	690.131	901.454	260.944	224.128	258.198	273.016	483.408	525.835
245892_at	13.83	13.3423	11.4747	14.0707	14.884	13.4822	14.524	15.9671	13.9762	14.2235	20.5257	16.7766	18.4974	20.7666	18.169	15.7981	12.2406	13.0855
245893_at	66.2095	57.9016	56.39	233.977	219.706	222.449	91.441	93.2427	71.08	103.646	113.458	92.4532	50.603	55.3345	51.9798	165.291	124.531	114.451
245894_at	122.489	129.367	117.966	185.519	149.831	139.124	125.093	168.198	146.749	183.548	197.212	155.948	105.197	93.567	89.9638	142.057	176.371	174.906
245895_at	66.5189	70.1388	73.158	33.8328	32.7605	43.2995	65.8826	63.7579	58.5799	38.971	40.8142	30.4907	54.1372	44.6726	46.093	47.185	50.3283	37.6462
245896_at	49.5305	45.2972	35.5627	50.9901	45.8777	58.4213	47.9628	61.2825	43.8797	45.1616	48.3942	59.005	42.6289	38.2133	37.9489	75.354	46.2068	52.5379
245897_at	52.5164	38.9678	59.6311	72.1508	84.9221	74.0104	78.4719	88.2761	84.1961	67.1724	33.7093	61.9125	58.6605	38.2463	38.0957	13.0984	72.7206	38.8272
245898_at	40.1458	30.8459	46.2752	28.2014	27.8057	29.9261	29.5887	33.3553	22.3584	31.3853	32.6101	41.0682	20.1813	25.6253	32.7417	33.6788	39.4899	42.3688
245899_at	37.9263	49.1232	40.8327	62.0781	53.3995	47.1579	47.3841	51.9638	45.2238	49.1565	42.9735	40.5252	43.2533	41.4819	38.6776	62.9434	44.7875	65.6637
245900_at	100.264	118.469	105.921	84.3935	92.5235	81.6501	112.251	104.098	113.414	66.2584	74.6424	60.5046	70.7537	76.6182	78.8792	81.7575	106.306	93.2906
245901_at	21.1505	15.5854	19.476	12.1914	13.9006	16.8568	17.6736	17.4285	17.9923	15.1181	17.9767	16.249	15.0599	19.8981	15.4255	18.4799	16.807	15.38
245902_at	8.95008	8.80422	9.22859	15.0179	8.83175	9.82196	9.16361	9.93681	9.10508	8.72931	8.77461	8.5515	9.45343	9.32002	9.50639	10.4819	8.356	8.48467
245903_at	52.2055	54.9347	66.7803	44.4411	55.3356	48.8095	68.0444	58.0612	53.8965	39.0271	48.954	42.642	39.9681	48.6773	41.9066	61.9991	53.2276	53.2801
245904_at	598.412	725.031	665.315	75.6424	97.4945	79.3862	705.045	757.594	646.775	96.544	126.873	107.322	1035.78	864.375	895.53	141.941	135.553	168.974
245905_at	411.198	434.164	412.84	381.97	344.011	334.865	443.847	453.523	522.444	701.03	894.794	828.566	583.484	615.641	735.485	366.025	419.473	390.473
245906_at	45.6896	48.5655	55.8219	36.2306	37.0357	36.9506	32.5312	28.2014	35.5919	39.1218	54.4316	43.2054	11.8843	24.7196	19.315	42.6254	42.01	58.2559
245907_at	9.07577	8.44434	8.47091	7.40526	7.82077	7.30436	8.39333	11.1254	8.84754	7.5667	7.30856	6.76345	11.1112	11.9502	11.4815	7.39493	7.05604	7.38097
245908_at	5.15426	5.0711	4.81096	5.02465	5.14411	4.97454	5.06444	4.83751	6.49218	4.99789	5.0445	4.9452	5.3585	5.38188	5.64175	4.9452	6.24294	4.96393
245909_at	13.678	13.599	22.1291	45.1903	43.122	51.0897	24.7252	19.1098	15.1418	30.734	24.8949	27.6718	16.9735	16.2957	18.206	28.2664	32.6504	31.6286
245910_at	148.599	179.087	172.899	162.467	169.502	166.077	141.859	183.925	156.294	174.648	194.708	147.523	168.891	181.546	167.103	243.104	162.273	176.733
245911_at	425.74	355.213	411.587	618.366	695.181	563.833	522.273	596.522	551.645	421.027	398.641	408.522	320.782	246.239	257.066	490.68	463.391	478.911
245912_at	6.09171	7.1337	8.41663	4.89548	5.13693	4.85383	6.0436	6.75886	6.6438	5.07068	5.83934	5.32952	6.7998	7.44537	6.26941	6.04683	6.53043	6.00228
245913_at	763.985	867.827	704.886	258.766	288.247	257.96	658.815	604.018	581.713	452.035	419.878	513.002	995.426	905.314	916.087	631.717	535.833	490.529
245914_at	29.7099	28.8589	29.0635	39.8116	32.7235	38.8496	25.4747	37.945	33.6733	25.6179	31.7386	30.6061	18.2255	28.5031	16.7319	19.2588	30.9869	25.4794
245915_s_at	6119.76	6490.01	6634.49	4148.57	4401.37	4281.53	7114.94	7287.68	7946.86	4688.02	5055.37	5241.35	5450.82	4709.64	5535.54	4527.9	5081.07	5243.5
245916_at	8.26553	7.87412	7.59738	11.0514	8.98839	9.97607	7.49878	7.5681	8.45371	9.22139	9.12193	6.39215	11.4257	9.54669	11.5641	7.25994	6.90621	6.93976
245917_at	89.03	77.0443	70.9647	148.899	162.12	170.936	77.171	110.349	80.1267	113.67	133.005	112.477	98.0729	86.3218	85.2366	103.321	139.605	140.623
245918_at	10.3157	10.7311	11.8363	10.4081	10.6184	10.2688	10.3526	11.84	10.564	8.74654	10.4543	14.171	12.5264	16.0776	14.6378	10.4698	11.5974	10.3144
245919_at	5.36114	5.17707	5.18932	4.95435	5.14855	4.81382	5.15193	5.46071	5.47115	5.07547	4.94104	4.81709	6.07846	6.3271	6.24243	4.96107	4.72925	4.82203
245920_at	5.62047	5.46453	5.51391	5.33412	5.49063	5.26446	5.49176	5.68176	5.68176	5.51481	5.41626	5.45219	6.60353	6.92467	6.76942	5.49176	5.31902	5.12366
245921_at	6.6717	6.79352	6.78278	10.4138	6.53902	9.37262	6.58079	6.7754	6.79449	6.69599	6.56027	9.35569	7.7169	7.78263	7.72959	6.2491	7.25219	6.4433
245922_at	20.4542	16.7622	16.4113	11.5361	13.9458	12.3888	16.7154	21.4608	17.5741	14.4838	14.1428	13.9765	27.15	31.5806	28.0397	16.4346	10.2204	14.222
245923_at	12.5599	12.2793	11.5191	11.9377	10.0361	9.71043	11.2742	12.6526	11.3374	11.2386	10.2078	10.4569	15.1442	19.5979	18.6798	10.0344	8.08719	10.9889
245924_at	210.704	200.767	176.704	140.693	148.447	169.732	137.036	142.965	152.539	130.579	125.268	151.789	98.0446	134.025	145.596	82.5081	130.14	96.82
245925_at	27.8663	23.3285	28.1078	29.641	26.3869	27.2405	24.0485	24.456	25.1188	49.1031	54.8626	43.3031	31.6572	31.6104	30.6061	45.8551	34.4371	36.256
245926_at	27.4477	43.5162	36.3223	48.9913	56.1842	53.5973	24.8218	36.543	26.5336	59.2393	55.5645	56.3958	31.9361	18.9706	19.502	88.1041	54.4059	51.8231
245927_at	5.91928	5.97326	4.82699	6.23987	5.98726	7.32043	5.82449	5.94731	5.98063	5.98407	5.97989	5.88099	4.47523	6.15813	6.1599	5.88099	7.56126	5.87278
245928_s_at	13.2848	12.0073	12.5646	8.01378	9.82721	8.39453	20.4021	12.2521	11.9159	17.4636	11.1188	15.0324	21.3338	33.4953	18.3875	13.6068	20.7103	17.3927
245929_at	101.004	92.3602	93.0763	73.167	71.9066	52.046	92.6186	105.999	88.8911	54.0039	77.228	72.473	92.1934	85.3557	80.1036	67.4045	67.6653	70.4448
245930_at	45.624	46.5325	44.0738	80.232	74.4525	68.9815	45.34	51.9584	54.1617	65.6017	69.9087	54.8828	28.1505	21.7139	28.6227	88.3051	53.7649	76.3323
245931_at	5.30964	5.28635	5.24159	4.90373	5.23363	5.67196	6.30842	5.46318	5.36246	5.18229	4.98743	5.1585	5.71711	6.16066	7.08988	5.11461	4.73742	5.14749
245932_at	23.2902	25.2782	28.4802	19.4248	20.0606	27.6599	27.9075	20.0256	21.4863	28.5934	39.6134	31.2156	37.3197	42.3313	37.368	43.8256	30.5822	36.5903
245933_at	13.904	19.5096	12.8448	15.8442	12.5728	11.7157	12.8485	12.3486	12.7251	12.372	14.0851	11.8439	14.7828	13.8875	13.599	12.7246	15.4916	11.385
245934_at	173.076	196.186	189.913	227.536	224.012	232.449	198.508	192.759	154.303	187.985	152.852	180.319	213.194	203.365	241.045	117.4	222.189	160.53
245935_at	6.6706	8.55572	9.34685	8.967	9.72401	15.0763	8.5329	8.55115	8.6586	9.71941	7.37597	9.94743	6.95718	6.98983	6.97721	8.31867	10.5516	11.2724
245936_at	48.6233	49.8735	52.7867	15.9651	17.3008	21.0906	47.7603	47.0785	42.792	17.7362	21.5814	16.4524	50.8207	63.5931	45.4444	24.1049	21.0422	21.2611
245937_at	110	101.856	117.993	148.831	119.242	159.77	131.849	120.397	151.552	104.553	121.935	101.339	51.2483	70.3812	65.3999	126.735	109.969	106.729
245938_at	198.044	179.698	223.135	251.328	204.324	306.704	221.237	216.348	202.357	186.393	236.771	184.656	162.951	162.173	174.569	234.102	196.262	233.794
245939_at	1801.68	1731.73	1675.4	2427.3	2743.27	2459.82	2142.35	2066.97	2695.02	2146.85	1939.31	2197.98	1260.71	1386.51	1287.66	1842.93	2012.93	1470.58
245940_at	154.088	141.347	146.888	212.311	209.16	167.275	165.906	197.228	154.538	279.668	191.354	166.952	146.214	111.127	108.975	214.666	203.633	247.914
245941_at	315.269	385.754	326.391	442.773	480.843	497.806	416.588	380.779	411.959	419.197	399.954	453.672	313.977	264.744	299.121	241.551	576.196	425.862
245942_at	12.374	11.7214	12.2657	11.1783	11.8264	11.0233	12.5718	13.3994	11.9627	12.9285	11.5086	9.25174	14.0522	15.6399	14.9563	10.7055	10.8152	11.1751
245943_at	11.8201	15.2266	12.6917	12.5858	13.3472	14.7968	12.6313	13.9172	12.9902	12.6917	9.48065	13.5383	13.1978	13.9722	13.9321	13.7682	13.9401	14.0453
245944_at	32.739	26.4325	33.5849	144.999	147.28	147.012	67.7015	81.583	60.5518	76.2101	104.89	84.2479	19.8646	25.7492	18.3012	60.7038	55.6147	62.9679
245945_at	17.8722	9.72361	9.48922	10.1072	19.5722	18.7506	13.9132	12.2335	12.0688	12.663	16.4883	13.2342	12.6506	15.5681	14.2815	13.6113	10.0915	15.8026
245946_at	4.74345	4.67152	4.76924	4.48683	4.70001	5.04678	4.75574	4.81491	5.15808	4.71548	6.84492	4.84288	5.68082	5.26425	4.78887	4.57129	4.52793	4.59463
245947_at	27.8583	46.5287	39.7666	29.4057	26.1291	31.3312	36.5671	26.0744	26.9135	43.9211	42.5606	41.305	22.8843	23.3669	19.1444	27.5216	48.2394	37.9349
245948_at	111.186	110.894	103.512	72.8372	68.4256	70.8628	81.3438	108.738	92.5084	87.5719	70.1792	81.8533	86.3218	65.408	63.8628	53.1741	57.6063	68.6565
245949_at	4106.69	4081.29	4041.75	6354.93	6436.9	6309.94	4075.1	4252.96	4687.44	4683.78	4868.78	5083.16	2859.95	3146.04	3134.56	4096.91	4512.86	4361.59
245950_at	82.9534	76.6969	68.5917	83.9647	93.0916	94.5755	69.5421	74.1565	66.6885	85.468	97.0111	86.212	50.7206	41.6372	39.7242	75.7824	74.3151	75.2613
245951_at	1363.66	1325.01	1270.01	8377.94	6397.1	7470.44	2133.83	2250.51	2214.92	7397.16	7810.77	7998.93	1561.12	1338.36	1295.62	4608.4	4495.84	4731.94
245952_at	287.307	243.583	323.016	447.288	445.949	543.257	191.772	171.435	198.749	296.759	193.401	243.483	142.912	152.878	113.395	98.8088	234.916	131.343
245953_at	9.86969	10.8436	9.26505	12.4802	9.82801	12.05	9.53141	9.26163	14.2288	10.3149	11.1861	8.39109	19.0644	12.4587	13.8721	10.1568	10.4582	8.38902
245954_at	8.97327	8.72179	12.1011	8.17773	8.42043	10.7659	8.13818	8.58952	6.93179	9.46003	7.71753	8.02333	7.73149	9.07931	8.63409	8.73397	11.5784	10.1994
245955_at	25.9281	20.3582	21.6605	9.99063	13.113	13.7996	26.2685	19.8299	17.3699	14.3052	13.1424	13.91	23.5098	26.556	27.5262	21.3833	22.8491	14.7662
245956_s_at	2169.9	2065.53	2398.66	4042.08	3487.3	3967.08	3151.09	2450.04	2355.89	2431.1	1813.94	2473.1	1632.74	1816.55	1599.94	3616.56	3281.33	3342.55
245957_at	378.985	423.09	410.018	203.382	186.941	194.301	370.549	397.35	395.412	366.371	367.895	302.979	398.936	452.054	537.707	292.619	381.092	321.336
245958_at	4.53351	4.4802	4.47027	4.38425	4.49347	4.34999	4.45085	4.53668	4.665	4.46917	4.42696	4.27242	4.98887	5.37636	4.81728	4.40158	4.33358	4.37292
245959_at	6.93549	6.73724	6.37171	6.91444	6.54574	6.24525	6.69586	7.2668	7.15307	6.44118	6.44224	6.31542	8.23064	10.4295	8.89363	6.52963	7.33578	6.07771
245960_at	42.3235	39.2812	42.2194	39.4591	40.374	46.7778	29.1903	48.3346	39.6802	59.26	50.0582	43.7375	37.9988	29.1197	33.2554	41.8189	37.6137	47.4864
245961_at	16.7436	16.4545	16.1976	18.3573	15.38	15.6862	14.8925	19.9628	18.2581	19.1428	16.7573	22.363	17.7027	16.5848	14.6788	16.0223	15.6862	15.6862
245962_at	5.23406	5.20747	5.13946	5.08486	5.32514	5.46026	5.13103	5.27724	5.78301	4.71664	5.11272	6.05031	5.80395	3.75418	5.75835	5.10747	6.19975	5.13735
245963_at	6.67334	6.80595	6.64435	6.02674	6.34064	6.1276	6.81784	7.14544	6.98036	6.29819	6.56243	5.95892	8.8539	9.48182	9.22063	6.16864	5.68339	6.04758
245964_at	19.12	18.7406	23.2281	17.237	18.5766	19.1924	18.1288	19.5939	18.7915	17.9834	18.3219	18.1035	20.5282	27.3313	19.5545	16.7994	18.4822	17.4808
245965_at	51.0708	44.2398	60.5208	39.6818	53.1261	41.8172	45.3838	44.7829	31.8332	34.4625	30.0493	42.1206	25.1642	31.5987	26.6018	27.4719	32.0748	28.6145
245966_at	36.25	35.9948	40.9494	56.4456	38.5729	47.2888	123.396	114.844	124.844	35.9062	33.3033	37.2975	18.6312	10.2551	13.2481	53.615	41.0581	40.2721
245967_at	46.798	51.2989	49.6843	74.1793	59.3391	51.0529	126.078	119.397	129.82	66.0871	63.4431	67.1531	20.101	29.585	24.4936	81.3037	58.0719	85.8127
245968_at	41.0926	31.4266	31.0991	31.9105	30.5157	23.7608	35.242	24.7562	33.3964	29.0969	31.9597	35.2167	50.1972	53.7307	49.7068	42.261	29.296	28.4855
245969_at	26.2001	27.3801	27.0692	28.22	34.4102	33.5256	18.3739	26.185	22.2503	30.2021	32.4391	32.4978	21.2952	22.2503	21.311	36.4531	33.3416	34.4562
245970_at	54.0217	55.1155	52.1573	55.8081	55.1155	53.2637	80.516	75.042	56.2408	33.8216	27.6542	34.9171	75.8042	57.5779	81.1169	54.0839	53.2637	54.0861
245971_at	177.972	180.416	196.929	104.452	122.54	138.406	172.643	211.589	172.7	178.851	223.195	179.116	126.104	192.032	161.954	244.908	199.6	196.113
245972_at	62.4181	56.5675	61.5171	49.202	56.0171	62.6031	52.9539	63.1765	60.3507	42.4664	41.1577	45.2637	54.8378	51.1306	52.93	54.3846	52.553	43.9735
245973_at	7.76874	7.30511	7.35328	6.36124	7.01485	6.4746	7.22157	9.76323	7.62959	6.83705	6.67553	6.73171	11.031	10.8276	11.1151	6.98839	5.91661	6.39583
245974_at	21.1193	19.3631	17.6196	33.7432	45.03	37.5103	18.6289	18.6595	21.9787	33.9943	46.6675	30.1519	24.3832	29.4995	23.7652	27.546	44.9386	39.2143
245975_at	136.935	144.497	110.394	245.507	160.362	175.615	130.673	122.595	130.416	150.829	150.507	185.005	148.444	113.193	141.281	160.972	186.842	154.818
245976_at	36.094	39.6777	30.5923	14.7534	18.0726	14.7349	28.818	30.1178	30.2748	19.5867	19.5557	17.8876	306.415	251.045	326.586	39.3693	26.0937	37.1943
245977_at	523.776	578.448	487.646	531.754	539.588	494.504	676.74	656.775	592.566	452.444	459.411	421.788	558.382	657.328	522.251	665.561	506.344	518.042
245978_at	9.06533	8.82341	8.77696	6.32984	7.31802	9.36069	8.61727	9.22006	10.0913	8.88834	6.88185	6.32178	10.3422	13.1003	15.4604	8.62825	7.9657	8.20751
245979_at	16.7663	28.4773	26.6297	75.2458	61.1794	79.0218	30.8282	27.3694	27.5103	43.1522	45.8268	40.9789	28.2722	13.8306	20.4072	50.8855	42.2055	62.6082
245980_at	184.857	151.173	156.738	161.263	161.681	139.628	182.555	150.702	145.435	224.759	232.315	210.869	85.1736	65.9611	92.9196	108.702	139.01	129.538
245981_at	203.007	207.083	210.583	620.593	583.7	583.916	208.132	218.792	230.112	662.887	545.471	591.594	133.355	121.352	136.133	296.527	427.229	285.659
245982_at	25.1622	21.2075	19.0436	135.167	145.887	186.412	34.8333	56.2188	54.677	35.8281	36.8369	32.6014	21.7211	25.2896	16.0892	65.976	89.5067	60.3817
245983_at	65.2939	64.7703	50.6748	65.1118	48.4171	54.604	70.8148	68.672	59.4856	50.3232	48.8646	60.5693	43.1992	50.7884	34.3841	26.5614	43.7851	41.3305
245984_at	111.126	96.1818	123.084	108.573	126.915	109.432	118.005	119.066	119.385	152.282	110	117.164	92.114	71.8446	83.1922	103.088	113.479	113.442
245985_at	374.282	362.241	370.412	292.559	303.44	359.987	375.884	356.631	397.008	257.928	251.112	290.929	204.421	299.022	229.687	276.913	294.391	301.589
245986_at	125.342	148.374	143.955	276.254	226.855	234.078	143.221	173.878	159.472	209.87	104.892	189.046	121.527	124.273	147.505	66.4588	182.083	113.386
245987_at	446.197	423.62	442.209	317.133	273.336	280.145	400.225	379.725	360.793	254.513	319.802	265.196	520.569	420.931	531.984	570.648	388.322	498.574
245988_at	46.2295	49.0688	59.4135	69.6507	65.9638	63.2467	40.3127	48.8215	39.9205	81.3571	82.7253	83.6342	64.3183	70.5607	58.0719	93.1489	75.9663	82.8614
245989_s_at	826.103	733.404	771.27	443.183	459.043	495.501	988.074	734.942	780.689	557.855	399.462	590.259	978.842	956.111	1199.78	395.624	524.39	472.202
245990_at	11.7166	11.2673	11.2229	10.812	11.284	10.3149	11.2137	11.1083	11.9617	12.4337	12.8924	10.303	14.1687	15.2122	15.6528	10.9551	10.6027	11.7311
245991_at	317.85	305.862	300.618	214.485	220.194	227.289	312.722	305.698	320.986	217.998	296.454	216.998	243.568	210.432	267.912	297.632	282.294	306.415
245992_at	4.90051	5.88824	4.90192	7.32795	5.09574	4.7029	4.66826	4.82095	5.04223	4.65227	4.84367	5.21153	5.21153	5.25021	5.20405	4.55695	8.15525	4.34713
245993_at	2028.91	2163	1892.06	1470.76	1696.98	1194.1	2231.41	1904.38	1962.67	1479.12	757.827	1546.85	1922.85	1977.52	2119.2	458.619	913.231	621.332
245994_at	5.30135	5.94072	5.22096	5.0261	5.25603	5.0736	5.25949	5.32143	6.67033	5.16253	5.19956	4.94825	5.63319	6.02081	5.54594	5.15511	4.88283	5.14517
245995_at	4.66653	4.48867	4.47762	5.76119	4.47762	6.39977	4.38191	4.6604	4.72439	4.60408	4.85024	4.54769	4.78298	5.00323	4.82878	4.76572	4.50234	4.53948
245996_at	6.34558	6.5248	6.1642	5.90689	6.1642	5.51663	6.15459	6.82639	7.83476	6.13011	5.94584	5.50033	8.37697	8.62045	10.2406	5.61955	5.74465	5.6274
245997_at	8.31457	11.1609	8.85027	13.1605	9.61952	8.14688	8.82993	8.34331	12.1594	10.4621	12.4469	11.4267	10.8205	11.2109	10.0291	9.34801	7.89647	9.30739
245998_at	273.207	286.305	296.771	527.014	493.977	535.217	443.392	482.545	443.392	1394.71	1134.96	1109.29	316.073	379.14	425.163	471.804	503.896	535.481
245999_at	2281.23	2297.4	2156.21	1600.27	1456.18	1563.01	2204.67	2361.32	2507.62	1932.08	2024.66	1999.21	2019.06	1896.22	2421.03	1469.7	1611.88	1403.56
246000_at	24.5864	21.1423	29.3822	65.6381	66.3511	60.1861	20.8118	21.3465	26.3587	73.8722	65.9123	56.4874	12.5391	12.2685	12.2318	146.981	98.7825	140.326
246001_at	349.503	335.216	382.724	239.944	299.146	314.48	158.802	155.283	137.807	245.825	140.982	224.229	71.5002	55.5429	72.936	90.2599	131.992	106.344
246002_at	91.0943	104.079	104.079	104.559	131.171	120.934	98.7926	114.12	99.6362	112.38	103.823	121.382	47.7818	68.8372	61.1744	114.938	102.047	102.551
246003_at	2171.01	1662.28	2008.34	1241.77	1252.37	1165.79	1597.48	1680.09	1601.15	1147.17	1056.56	1047.92	1012.38	1058.65	1123.89	957.801	889.536	775.654
246004_at	2974.38	2826.43	3078.92	430.594	609.226	456.083	1903.01	1963.68	1757.24	926.818	869.504	922.072	1767.09	1787.01	1669.98	378.13	692.644	358.879
246005_at	83.4867	95.6225	103.126	61.089	69.6136	75.6518	79.4581	96.5222	58.7148	48.3068	67.5848	68.5748	65.7231	79.8638	84.4282	79.8114	94.0487	86.51
246006_at	1198.84	1221.11	1165.82	1231.18	972.89	1094.17	1227.14	1213.11	1242.76	1105.97	1322.62	1162.95	1040.52	1084.86	1159.51	1361.65	1161.66	1171.96
246007_at	48.432	44.1853	52.7065	24.802	21.3495	20.7794	50.7706	45.7047	57.6797	24.4741	29.9962	19.3341	40.2879	34.9745	43.6119	29.3309	22.5586	19.4248
246008_at	34.4427	39.3442	33.9643	37.5057	39.2538	33.7446	35.1791	32.0405	33.4685	26.4281	34.5753	33.8029	20.7785	27.6468	21.2219	43.344	33.5649	35.7399
246009_at	44.1944	31.7797	41.6219	62.5786	48.6853	60.0725	37.2983	59.9529	42.1042	45.9607	46.1613	47.0882	36.2679	27.2041	34.4611	39.3248	45.4463	62.1087
246010_at	43.8761	55.8793	42.3323	20.3527	36.1311	25.2907	37.5851	50.1117	44.9607	28.9991	28.7772	28.2194	45.6259	43.8941	35.3239	19.4528	25.424	38.44
246011_at	391.991	412.069	356.982	185.992	174.762	189.158	407.382	420.456	377.617	339.812	278.567	380.967	252.975	216.286	263.361	143.394	232.406	210.951
246012_at	58.8355	62.2722	66.2789	59.2673	59.8987	52.9452	64.152	54.759	62.6082	55.7348	70.9997	80.4532	97.1108	75.8696	75.0451	77.5396	58.9807	69.9345
246013_at	16.623	16.118	16.0111	14.6159	15.0568	14.4274	15.9625	17.8516	19.2283	15.2711	14.4496	14.5512	20.0729	23.7043	24.804	14.3161	13.3308	14.5727
246014_at	8.50578	7.98118	7.78615	8.03447	8.20793	8.06406	7.9563	8.75364	9.90502	8.1154	9.52975	7.34189	12.1454	12.4129	10.9794	7.58358	8.07425	8.29444
246015_at	24.1832	26.427	23.7208	27.9271	24.5334	24.4449	23.6197	25.0446	20.8846	28.0144	28.2269	19.9783	20.0474	11.1028	22.7568	26.4966	26.898	26.0124
246016_at	33.5242	30.1234	34.1525	39.5922	40.3442	43.4536	48.9349	46.1499	35.8959	40.6144	46.6665	47.6319	37.4826	33.6056	27.0464	55.3743	38.781	50.0274
246017_at	132.098	133.068	119.01	136.217	97.3465	116.814	132.489	172.892	147.592	82.6744	75.0606	76.973	134.077	144.818	136.747	85.6912	103.508	106.263
246018_at	69.2897	60.8548	68.6269	153.832	116.926	151.876	61.2561	68.7722	68.1787	176.049	184.519	158.577	696.267	526.17	664.905	247.131	184.341	187.399
246019_at	39.3887	32.0774	48.7213	26.3896	32.7498	32.5887	22.1404	30.38	27.7892	29.0509	28.1985	25.4653	15.4442	24.3752	18.0745	23.4712	24.7562	23.1191
246020_at	53.3995	74.4556	49.5305	81.5177	69.5421	76.5332	51.0194	56.9382	49.806	61.4868	78.2949	84.5861	52.3677	36.137	44.1799	57.3489	60.4574	71.3125
246021_at	93.0286	120.657	106.483	50.8019	52.6633	41.2508	108.62	112.428	97.8918	77.236	67.6112	62.3503	95.0487	91.9817	86.1536	48.0624	60.1762	85.1124
246022_at	6.51088	5.21839	5.31924	4.96107	5.30615	4.86201	5.32777	5.55232	6.65363	5.17314	5.30528	5.02486	5.93974	6.60516	6.18119	5.14305	5.48567	5.01661
246023_at	7.87639	7.303	7.71721	7.47602	7.53274	10.554	7.77513	7.89031	7.58708	7.34875	7.59207	7.62771	8.29274	8.30945	8.83211	7.65187	7.2665	8.27097
246024_at	5.09825	4.96107	5.38807	5.28439	5.3976	5.13968	5.13714	5.11587	5.18356	4.9981	5.79775	5.21582	5.32077	5.33828	5.33828	5.69437	5.89623	6.01092
246025_at	3.88709	3.86353	3.8702	3.84627	3.89829	3.89829	3.83413	4.34517	3.95376	3.88965	3.86131	3.77288	3.92948	4.22252	4.02918	3.83728	3.77846	3.76669
246026_at	100.153	84.746	83.49	93.69	87.5287	88.1493	98.5252	128.088	129.118	49.2404	54.2207	63.1065	62.1291	53.6943	63.0236	43.3565	67.7961	73.5044
246027_at	36.5994	39.5549	42.1172	96.0417	92.2408	98.087	41.1551	47.1618	38.0723	60.1836	57.7093	53.0977	33.5752	23.8278	26.8996	55.9493	59.6851	66.0899
246028_at	200.842	238.666	211.337	128.652	120.716	153.239	208.119	198.08	205.591	197.577	203.65	222.38	233.396	223.943	275.359	201.197	200.38	200.817
246029_at	2117.64	1828.64	2003.36	1166.68	1370.23	1292.67	2130.81	1797.06	2057.28	1682.75	1872.42	1749	2785.8	2246.31	2632.92	1615.82	1472.09	1432.36
246030_at	301.068	317.961	311.139	238.122	253.131	259.959	338.378	314.003	338.878	264.581	311.331	318.602	317.531	300.081	332.016	169.579	264.896	251.039
246031_at	91.8947	90.6649	94.0351	139.932	148.014	156.387	86.6433	74.9158	64.2364	93.5823	100.104	70.5477	63.2843	73.0679	68.3919	116.607	126.597	121.802
246032_s_at	21.7514	20.5933	19.5056	22.34	26.3376	21.9228	17.315	25.3052	27.4923	25.1368	25.6	16.1677	29.9347	30.0295	27.1243	21.5327	19.2287	23.2692
246033_at	703.194	597.921	774.906	295.809	332.877	338.531	596.939	599.889	603.349	215.112	228.286	241.422	338.225	312.176	321.825	200.388	271.038	234.849
246034_at	16.9241	18.1858	20.0795	16.2777	17.9111	20.9693	19.6012	14.9324	12.8543	25.1193	20.0334	21.9823	52.6373	48.3823	72.6847	18.3547	22.1427	21.108
246035_at	907.343	773.919	825.95	1613.67	1472.54	1626.98	1268.66	1049.88	1109.1	930.671	804.783	947.257	892.702	862.851	899.623	731.629	1274.61	987.14
246036_at	38.3312	51.2062	43.0601	34.5206	35.2978	34.5419	24.6983	38.4463	33.7065	41.6937	46.8624	41.1239	18.7383	20.9792	23.0466	58.9177	46.3132	52.5207
246037_at	32.9035	47.1346	33.7966	26.3934	26.8185	25.8622	32.6839	34.877	30.2897	27.8503	30.0159	31.7536	29.4359	29.7068	29.4638	39.716	33.5132	42.6674
246038_s_at	32.9278	26.6079	30.1073	33.8786	41.2694	36.4336	24.6354	28.7123	42.2975	34.1679	35.8369	40.7891	30.7258	35.2211	25.7339	33.9902	39.3523	34.2452
246039_at	69.3437	83.1085	71.5971	95.0662	106.645	98.8554	71.9391	70.5433	67.902	88.5721	51.2631	108.492	55.2254	76.1193	58.2547	99.2481	89.7017	98.9387
246040_at	239.206	205.266	221.391	248.357	249.032	207.615	203.788	250.133	206.187	194.281	163.022	171.907	138.684	118.439	123.69	186.229	161.638	176.882
246041_at	805.015	788.163	729.588	810.689	648.132	711.65	851.163	745.524	770.493	653.29	386.849	622.201	864.269	596.449	652.834	125.504	528.618	295.227
246042_at	818.183	832.764	921.163	1254.17	1042.98	1244.81	1105.13	1168.96	1199.16	868.415	762.793	905.723	2214.06	2404.38	2213.33	1055.61	1036.36	1076.94
246043_at	26.1302	26.1624	21.0111	25.8186	25.0703	30.9081	25.6179	23.947	31.7562	24.9501	30.7953	24.9163	28.9432	24.9061	24.805	25.1508	27.61	31.0455
246044_at	180.356	232.363	224.151	388.298	422.725	371.937	174.068	217.332	176.929	523.819	410.203	615.136	214.402	237.809	193.052	495.877	465.834	480.133
246045_at	69.7395	66.7982	60.4078	49.093	43.4545	48.7113	40.0124	50.3862	57.356	69.6107	84.0544	77.3582	51.1075	58.4021	45.5079	54.5995	50.4173	57.8671
246046_at	4.93911	4.88022	4.79655	4.73839	4.88865	4.66423	4.86421	4.94723	5.02176	4.84865	4.79242	4.70445	5.19678	5.1874	5.26382	4.93729	6.50767	5.99982
246047_at	4.87902	4.74657	4.90071	7.06082	4.93141	4.75555	4.88383	4.95659	5.04036	4.89267	5.05654	4.93141	5.54708	5.73852	4.91442	4.80582	4.45414	4.78062
246048_at	13.9172	14.0274	13.3944	12.0317	13.0126	12.7266	13.6186	14.3255	20.1895	12.7355	13.1399	12.4869	19.3269	21.8311	24.228	13.2092	11.4154	11.3864
246049_at	6.97921	7.09192	6.61005	7.13869	6.96776	6.66375	6.62554	7.2281	7.10242	6.85561	7.35388	6.655	8.28661	8.59587	8.47526	6.8177	7.31502	6.81826
246050_s_at	295.736	336.354	394.35	379.452	368.227	359.248	329.408	349.266	322.698	406.454	321.666	344.917	292.078	308.011	248.888	303.758	342.215	354.207
246051_at	556.561	574.588	581.904	466.542	417.513	392.113	470.468	509.348	491.023	365.342	331.935	375.513	336.811	377.912	366.206	340.651	308.657	310.896
246052_at	11.6914	12.1429	12.1275	24.3147	16.7832	15.6901	12.9104	10.0336	10.4834	13.6066	19.323	14.6556	12.6625	12.4836	17.3499	16.4113	19.5561	14.4871
246053_at	27.2237	29.2972	28.1817	41.4904	39.362	28.7063	26.5958	27.3762	31.3479	29.3599	44.6781	37.7794	28.9348	21.1636	30.4106	29.2888	25.5507	27.3998
246054_at	8.29411	8.65398	7.26531	10.4599	11.1604	13.2707	8.06696	8.96406	8.50107	9.14143	9.94048	9.15985	8.96737	8.68318	9.52437	16.2911	8.96627	9.45382
246055_at	136.705	139.416	157.247	127.925	123.942	141.005	128.235	131.83	141.871	137.833	110.666	127.505	143.212	120.597	138.15	147.003	125.288	104.147
246056_at	160.296	133.717	145.949	97.711	118.924	104.006	135.186	146.785	128.393	129.383	111.712	94.3814	97.6788	99.2359	88.5922	93.5208	125.51	94.2381
246057_at	41.0294	34.2818	35.2153	53.2353	58.6726	55.7348	42.3879	46.7125	37.3305	29.0134	36.1444	29.4777	28.0443	19.8446	16.0387	40.5335	37.9614	33.1599
246058_at	75.3742	78.7707	75.4021	40.6979	39.076	43.9943	67.4724	64.6693	61.1706	66.7228	69.5035	54.1461	64.6427	75.7249	62.5504	72.9974	51.1506	64.5127
246059_at	105.877	116.397	123.927	113.321	121.972	131.646	115.066	116.335	83.1409	102.32	126.857	96.1937	102.198	100.277	107.503	169.057	119.086	149.291
246060_at	169.203	149.794	169.036	215.271	192.118	224.593	103.925	131.624	147.329	186.309	181.725	192.608	108.141	124.452	105.318	219.937	170.753	173.882
246061_at	65.2108	77.1376	72.0427	110.183	108.89	110.34	68.0388	76.8482	74.4326	85.2436	77.9627	67.2939	61.3782	65.7419	67.7766	125.391	103.644	122.062
246062_at	254.309	256.007	259.565	207.364	222.764	223.443	230.405	247.965	243.014	223.333	248.097	220.915	235.583	260.077	224.565	187.834	194.796	204.521
246063_at	97.1706	81.5043	96.431	52.061	55.4835	59.0534	69.5821	73.9101	65.0863	124.268	145.89	145.196	60.7212	44.5791	37.938	78.8338	72.5535	73.0619
246064_at	130.708	164.434	154.139	160.708	178.646	158.102	161.947	128.035	127.778	152.639	182.353	162.06	133.508	146.364	135.82	176.516	119.906	129.458
246065_at	7.82013	7.86329	7.67958	7.93989	6.91501	6.65432	6.92126	8.06133	7.95491	6.48192	7.44231	7.29941	8.81598	9.66249	10.0553	7.49262	7.00017	8.31525
246066_at	139.851	146.843	150.559	108.921	119.091	112.657	136.918	140.058	144.405	135.214	135.759	133.981	156.667	186.259	148.115	82.5048	140.058	138.981
246067_at	4.16482	3.92665	5.00467	4.99286	5.06267	4.91634	4.98917	5.20843	5.12502	4.74589	4.97996	4.98221	11.7506	9.20247	12.1811	4.98221	5.08748	4.94754
246068_at	8541.26	7844.69	7459.72	12447.4	12438.7	12292.9	8531.62	10003.1	10731	7151.85	7649.78	8194.82	5426.25	5693.87	6116.87	8619.5	10908.8	9680.51
246069_at	51.2031	43.9139	34.1813	13.0853	13.0673	13.7767	34.1357	35.7142	39.0897	16.8052	18.6664	18.2356	29.5838	29.6629	18.8533	15.1181	14.8321	18.9652
246070_at	267.494	256.038	248.413	1033.28	743.185	854.736	296.016	377.307	381.108	368.575	367.834	368.402	264.995	275.325	267.214	684.794	590.525	608.826
246071_at	790.206	707.25	712.031	230.311	294.355	300.945	310.297	292.751	294.258	334.749	390.088	362.524	279.49	283.38	266.129	215.483	201.37	190.437
246072_at	7.763	7.6717	7.58085	10.0303	10.6415	7.23047	7.59519	7.71341	7.72229	9.13505	7.55536	7.52934	10.0147	8.38557	8.94346	7.53676	7.86701	7.12375
246073_at	315.289	321.917	254.717	527.469	422.551	493.774	377.214	356.557	436.875	277.996	291.049	257.177	188.577	204.446	208.012	374.02	331.976	366.597
246074_at	121.233	87.9648	111.026	92.6833	100.752	90.7842	85.2331	78.1246	79.9951	90.6611	84.4107	114.74	71.3183	71.7856	62.2057	82.4133	71.3271	71.4327
246075_at	102.636	91.7853	115.848	35.7759	26.3393	43.7824	51.9905	53.3228	49.4086	45.6427	50.0624	49.3265	26.0755	28.8073	28.9759	35.0327	28.0904	31.8404
246076_at	730.922	752.384	677.505	377.4	469.812	500.533	544.061	649.944	555.066	554.621	446.664	574.588	401.946	525.371	375.915	246.522	424.465	464.535
246077_at	6.49298	6.38087	6.36307	5.56785	6.38087	6.72646	5.14538	6.54439	7.61143	5.80228	9.29173	7.52192	6.96947	6.97549	5.86458	6.37171	7.20231	6.07047
246078_s_at	15.6085	14.9238	14.8742	9.88592	9.2123	11.453	12.8527	14.3243	14.4378	11.4808	13.0046	11.6902	16.7477	22.4126	26.0327	16.6421	11.1201	10.0307
246079_at	7.10505	6.93948	6.94689	6.30505	6.53714	6.78668	6.91899	7.02033	7.02033	6.89968	6.88892	6.33361	7.31832	8.81616	7.4616	6.88892	6.78668	6.81574
246080_at	13.5667	14.8443	12.3781	13.1184	15.3056	13.01	13.9808	17.0602	13.0249	17.1769	13.0196	13.4529	14.0776	14.1495	13.9555	15.7845	14.615	13.7304
246081_s_at	236.523	311.203	340.385	346.565	359.115	440.379	265.354	230.329	195.864	490.378	390.313	652.995	267.521	269.396	250.01	152.89	619.446	419.775
246082_at	5.7157	5.43989	5.60411	6.16294	6.33907	5.20554	5.40426	5.64825	5.77446	5.62486	5.52774	5.06319	8.90131	7.63241	6.48871	6.42717	5.38652	4.93992
246083_at	20.2943	19.0808	20.2502	20.2801	20.241	20.2635	17.8612	18.4178	13.6892	27.2998	19.2722	25.4449	19.194	19.1491	19.6972	20.6993	20.2701	24.1703
246084_at	15.6682	17.1332	15.9382	15.3787	15.4572	14.0984	17.6896	15.8001	18.7799	15.1654	14.7926	15.1916	15.3522	15.572	16.5643	14.6812	14.2089	14.2089
246085_at	44.6836	38.6458	40.7087	24.2529	29.6154	29.0766	34.4201	38.1051	54.2976	28.5793	28.9241	26.6965	34.8311	32.0655	22.0058	33.0579	20.9844	25.3416
246086_at	7.67643	7.58054	7.35902	7.30661	7.49139	6.6348	7.40025	7.86669	8.03356	7.06285	7.24594	7.30931	16.1558	12.1369	11.2474	7.57276	6.9011	6.96232
246087_at	44.1609	43.7636	48.0683	31.9295	35.4198	28.7246	34.2882	35.5167	23.944	29.3376	37.006	40.0684	32.4785	36.7599	38.5594	49.2313	36.865	43.2489
246088_at	59.2283	61.9354	52.7889	287.259	235.08	271.194	58.0696	59.8274	73.3235	173.333	236.543	186.972	51.076	50.2725	57.5235	167.124	162.908	162.44
246089_at	718.554	701.665	646.404	763.97	693.299	655.603	710.862	689.097	696.353	648.558	767.997	718.908	586.777	590.258	659.329	788.585	596.572	642.591
246090_at	192.87	225.314	199.468	339.38	347.363	335.251	172.902	218.043	211.345	530.401	446.343	509.39	197.577	251.7	232.029	252.466	293.425	310.973
246091_at	110.817	111.332	110.766	79.4156	77.3169	78.6333	118.695	88.4649	75.5307	67.3575	75.3076	68.891	71.0231	73.8676	78.4011	100.067	73.1039	77.7724
246092_at	823.156	668.891	752.972	950.999	795.237	943.916	924.613	1136.27	1028.91	702.112	812.423	698.301	631.418	540.098	577.191	912.201	752.817	876.533
246093_at	84.0993	87.4748	88.2399	63.5018	68.1171	50.7373	97.4304	75.9819	65.4617	99.3216	125.36	95.4184	61.2775	36.6287	76.9272	121.148	104.666	96.8996
246094_at	25.8994	34.0684	32.0669	63.4992	64.6892	62.9073	25.4167	27.1901	27.0065	44.0784	46.1764	37.1362	29.5183	24.9071	31.6767	38.7046	52.4517	50.5978
246095_at	16.7525	17.7464	17.6048	12.1135	14.0799	11.1545	15.0352	14.3886	14.5946	12.4423	15.7586	14.4502	19.4184	22.6235	19.35	19.4152	17.511	20.1763
246096_at	6.33205	7.65282	6.01611	5.47329	6.00771	5.86097	6.00771	6.37328	6.29057	6.60733	6.7461	5.33303	8.15257	7.24415	7.20734	5.83742	5.33171	4.79793
246097_at	608.851	578.686	707.482	247.944	278.928	282.891	663.636	612.01	661.798	335.561	327.62	411.08	712.645	617.96	711.533	323.986	305.943	298.838
246098_at	166.05	165.586	184.114	258.926	205.583	273.712	167.103	198.961	201.246	151.222	196.21	169.795	248.194	277.853	283.043	232.65	180.779	221.551
246099_at	10.0005	13.4421	7.76683	50.7091	36.4344	33.2042	15.2419	15.3254	18.9157	22.5757	22.3965	20.4244	185.873	165.665	208.273	27.7327	25.5155	22.3726
246100_at	7.2659	6.8542	6.55004	6.76275	6.64462	6.17916	6.76275	7.47725	7.34211	6.58701	6.04708	5.68432	9.10097	9.99781	9.09685	6.32269	6.72839	6.745
246101_at	6.02105	5.8123	5.72275	5.7204	6.49218	7.12697	5.89986	5.67173	6.17155	6.61059	5.74371	5.61978	6.52935	5.78705	7.16631	5.74394	5.56556	5.69484
246102_at	9.0291	8.61461	10.2359	8.16229	8.47492	8.22016	10.0807	8.91906	9.23883	8.09983	8.92255	6.41794	9.35127	12.1564	11.0764	8.27063	7.7493	8.05041
246103_at	16.8087	16.4781	15.6168	73.8009	77.6766	73.8919	16.2369	32.4058	32.3979	57.1819	47.3335	43.6872	25.4919	25.1952	14.7489	43.4028	29.9753	43.6729
246104_at	11.9102	11.0891	11.8191	16.9296	21.5956	15.3755	10.6954	12.427	9.91072	17.6656	12.0114	14.0326	13.5138	13.0522	12.886	11.6648	18.0997	12.0966
246105_at	7.17898	7.03419	7.00075	6.74167	7.01918	6.64653	6.97005	7.45547	7.34724	6.97005	6.75331	6.79561	8.95706	8.25298	7.92409	6.86435	6.74804	6.54197
246106_at	6.51168	6.25218	6.79645	6.25398	6.42744	8.69389	6.71817	6.96976	6.66978	6.43325	6.08645	8.22557	8.94603	7.49016	7.76396	6.22706	6.23756	5.9637
246107_at	7.59738	8.01049	8.02235	9.8373	7.95213	7.35872	8.0329	8.4784	8.45544	7.78503	8.21004	7.35026	9.07893	13.2239	9.76684	7.67233	7.57152	7.69822
246108_at	55.5794	64.7929	48.7173	93.9134	95.0701	93.5727	69.0255	51.9158	44.7644	197.2	167.199	267.499	165.559	187.164	174.286	175.186	158.479	163.505
246109_at	45.8711	52.2227	51.9232	69.4835	62.4374	68.274	63.2505	55.8632	47.9303	97.1407	84.9063	91.1035	44.5809	38.4313	34.814	58.8875	62.0793	54.0273
246110_at	17.5661	22.0687	27.5301	17.2451	21.0746	17.962	17.1128	16.7487	12.6217	22.1504	23.9509	19.3126	12.2988	21.0989	14.4755	19.1893	12.7191	20.6318
246111_at	51.397	40.047	66.2694	72.6594	72.0294	70.9982	36.5738	47.1753	36.4284	56.7595	59.4221	61.2259	44.0793	41.0648	34.3248	91.6535	74.6439	74.2311
246112_at	55.1903	68.6819	63.8392	109.199	108.037	118.374	68.288	70.8744	46.5669	85.368	80.1826	87.9793	47.0746	62.4823	55.9298	84.1338	107.3	87.2863
246113_at	5.53547	5.41759	5.37945	5.47486	5.98899	5.1602	5.30092	5.55141	5.61148	5.18122	5.85351	5.47486	6.14625	6.42084	6.27431	5.51731	5.53547	5.52547
246114_at	361.929	361.201	325.467	295.7	333.274	280.658	329.056	321.996	377.446	470.526	569.583	473.143	517.276	480.586	464.802	513.487	402.293	463.905
246115_at	60.17	54.1906	68.1227	55.955	47.5782	63.3715	62.4618	47.3403	50.7206	58.9371	55.955	70.1042	54.2641	56.4908	70.2888	40.9654	40.3491	37.4811
246116_at	6.44277	6.19313	5.94975	5.78396	7.93256	6.53714	5.94926	6.11527	8.42736	5.84894	6.01957	5.93316	6.53338	7.9711	6.62418	6.0374	5.85567	6.18348
246117_at	24.6142	40.6987	33.5669	28.7299	35.0277	43.0141	25.301	26.4661	35.5919	44.3071	50.2148	38.3737	25.1136	38.3595	28.0674	54.5883	40.826	48.954
246118_at	5.07131	5.05799	4.82144	4.80365	5.03209	4.41117	4.98211	5.25107	5.1144	4.62797	4.89588	4.89588	5.38321	7.134	6.29522	5.00755	4.96903	4.78003
246119_at	479.482	441.32	454.176	251.173	299.945	260.644	444.943	451.794	465.165	353.277	408.102	391.42	358.54	427.668	411.418	313.049	338.225	327.506
246120_at	60.2269	59.1384	63.4522	63.1039	67.4156	63.0185	67.1752	63.9809	57.2571	65.8122	49.3194	57.3772	61.6917	50.1426	40.2085	54.8874	65.4967	79.282
246121_at	11.9593	13.4225	11.8507	11.4365	12.0154	11.5546	11.9829	12.2074	12.5218	11.8507	11.7258	11.7065	14.051	13.6533	14.9471	12.8485	11.3915	11.3439
246122_at	33.5063	33.7689	45.5191	21.3934	28.0933	28.4341	26.8847	31.7327	26.3988	43.0017	41.603	37.3542	42.08	26.4488	22.8317	19.2216	23.774	21.4961
246123_at	4.01728	3.95376	3.94144	3.8387	3.96678	3.77614	3.92657	4.00542	4.08132	4.26891	4.65887	3.77164	4.28332	4.33857	4.33002	3.86655	3.80901	3.81042
246124_at	326.559	314.907	295.348	209.375	246.32	227.191	305.93	278.579	269.246	178.001	200.224	193.771	232.745	242.585	198.912	221.26	201.983	211.137
246125_at	67.2097	62.3426	57.7046	35.19	32.3135	30.3152	74.3654	67.0056	76.973	35.8524	39.3765	31.0104	42.3975	45.3074	49.0738	37.945	32.8495	35.4395
246126_at	435.539	469.87	538.835	90.8103	95.7856	109.698	513.192	599.52	507.219	106.694	110.571	121.932	437.188	481.238	416.229	120.152	101.57	117.371
246127_s_at	5.15151	5.08884	5.08132	5.09637	5.2569	4.85005	5.02444	5.23922	5.27312	4.97945	4.94419	4.76317	5.61194	5.85231	5.68713	4.97188	4.84805	4.84049
246128_at	4.6792	4.62493	4.63025	4.49827	4.62493	4.54209	4.61848	4.81096	4.738	4.58031	4.49642	4.49088	4.88423	4.92857	5.09448	4.47762	4.509	4.49088
246129_at	5.77256	5.67942	5.56122	5.62879	5.75977	5.28765	5.69391	5.80633	5.90786	5.67942	5.6501	5.77897	7.24087	6.86068	6.78334	5.62879	5.49898	5.56442
246130_at	7.41546	8.51505	8.48328	8.40454	8.5266	8.23199	8.14989	8.30945	11.2303	8.46761	8.32996	8.40454	9.27152	9.38957	9.50912	12.3122	9.85429	8.0329
246131_at	262.147	306.27	281.212	437.188	322.142	432.26	297.491	355.344	313.5	403.9	345.612	341.085	427.562	438.772	431.497	508.366	453.896	461.018
246132_at	19.6302	14.2955	17.8037	27.067	20.6729	22.0438	20.5139	20.9602	20.0083	18.4408	18.5453	17.0322	21.9147	22.201	24.0179	24.9276	19.6883	22.3722
246133_at	255.712	263.789	281.662	135.072	122.484	161.018	252.788	231.145	234.165	252.207	292.414	294.633	1058.62	1072.81	1000.45	243.463	226	234.242
246134_at	61.5398	67.8713	63.973	56.1761	58.0528	57.4834	58.628	58.2368	49.7773	65.9258	51.1285	50.5147	58.7003	64.1204	54.1061	65.3649	49.3944	66.952
246135_at	264.995	343.955	334.302	244.626	200.323	226.111	367.562	427.176	396.91	247.761	208.038	259.703	209.461	227.77	250.612	184.349	242.744	223.158
246136_at	3.79979	3.77505	3.74032	3.70576	3.79573	3.74709	3.73357	3.81104	3.93287	3.72836	4.16755	3.76622	4.23451	4.08199	4.10317	3.72285	3.6685	3.69694
246137_at	7.71373	7.58459	7.56188	7.32584	7.60112	7.2504	7.4708	7.9829	8.4885	7.51975	7.36809	7.29341	10.1068	11.1284	10.0177	7.61863	6.58538	7.29341
246138_at	9.1283	6.8535	7.86555	6.47115	7.27068	6.75345	11.4448	8.60241	10.1139	9.56927	8.73021	9.84276	8.08005	7.23017	8.12649	7.41637	6.06175	7.35086
246139_at	212.215	206.285	208.123	216.406	228.614	254.027	184.933	144.839	115.905	284.173	293.353	202.39	322.553	236.815	229.555	326.365	250.648	336.797
246140_at	43.4242	45.6559	36.899	45.7009	43.8779	48.9018	51.2	51.8923	52.2603	50.4442	50.155	41.1797	30.8992	44.6469	34.5476	53.4478	39.3976	41.8688
246141_at	15.8429	13.0828	15.1157	14.692	17.8004	14.5097	14.8169	14.2071	16.5236	13.8607	12.6422	12.5553	15.153	10.4004	15.0958	14.5994	16.6052	21.3408
246142_at	132.245	155.053	115.234	41.0791	47.6172	48.9148	141.043	135.91	114.825	81.2185	66.1863	82.4353	84.8383	69.675	73.2377	112.066	101.662	96.1166
246143_at	235.09	240.976	235.535	374.412	391.758	292.727	312.85	298.048	337.323	372.12	300.747	332.071	190.938	178.045	156.397	207.441	336.52	266.162
246144_at	55.5292	50.0192	59.9086	53.8998	43.2089	52.4926	46.6052	47.1521	33.6802	74.5658	78.0893	74.8266	56.2477	59.5748	51.1012	69.8083	67.5543	82.8478
246145_at	3.86528	3.80557	3.82767	3.75572	3.83397	3.66007	3.80135	3.88151	3.94614	3.85149	3.74663	3.66534	18.6561	7.43407	10.2511	3.75572	3.70698	3.73664
246146_at	196.864	199.575	196.637	191.787	211.615	158.472	224.962	187.796	188.097	226.855	250.771	254.142	304.039	255.597	311.536	247.354	226.222	258.511
246147_s_at	632.716	654.23	573.786	1016.52	724.153	965.562	644.468	528.639	482.991	650.372	604.415	668.286	849.415	903.771	850.393	586.487	586.535	633.184
246148_at	71.6737	61.0689	63.2961	225.86	171.66	217.261	61.1694	65.7987	46.0495	160.451	206.446	169.614	73.3792	80.2189	78.6139	235.293	157.577	210.557
246149_at	348.908	358.305	345.485	142.432	140.866	156.037	349.725	338.1	362.762	443.246	494.099	478.715	574.117	502.759	675.643	531.209	389.881	404.58
246150_at	105.076	98.0205	105.682	91.2365	68.6339	80.4201	106.344	124.851	173.782	90.2896	131.279	107.644	83.2127	66.0912	74.451	100.636	105.153	95.9096
246151_at	24.9491	22.5549	20.5882	35.2659	25.9558	39.154	16.9268	19.9726	14.8712	31.8345	38.1255	31.5767	15.4287	24.9711	18.6155	20.3494	35.8384	22.232
246152_at	73.7676	68.3021	76.3198	100.124	90.8476	96.0516	81.2036	73.6525	66.6365	85.3066	77.5491	82.6914	42.0204	53.5313	46.3589	82.9364	71.6826	74.4862
246153_s_at	2026.53	1434.45	1831.16	5035.99	3618.94	5112.05	1972.33	1769.19	2096.13	3868.59	3564.05	4000.13	1541.49	1323.27	1870.38	3287.81	4182.61	2600.19
246154_at	306.037	273.157	296.138	42.1544	65.0476	38.1952	143.073	150.445	139.625	87.3994	60.1119	83.8561	144.985	209.105	138.71	45.7619	80.3756	63.9625
246155_at	12.6745	15.9855	11.2169	15.1667	12.9131	10.8401	12.4689	10.2928	15.3314	16.7312	15.0871	14.618	10.3441	13.6455	16.7243	22.1027	13.745	16.2023
246156_at	1449.91	1542.95	1233.71	1318.22	1281.86	1370.85	1634.55	1553.12	1623.44	1579.56	1362.26	1542.82	1205.11	1259.1	1162.9	1570.83	1138.65	1419.56
246157_at	671.354	591.155	510.584	956.994	689.408	1001.39	909.17	912.463	914.264	462.687	590.379	598.855	507.072	458.675	460.034	682.561	737.512	659.058
246158_at	45.2526	39.2441	36.4292	53.6976	50.7946	46.1916	48.945	39.2764	44.3937	59.366	53.2069	64.2482	105.359	72.5595	92.7175	43.1752	45.208	48.0456
246159_at	23.0745	24.3447	22.3575	18.6921	17.2554	15.5323	12.7861	14.16	13.2587	13.5108	20.578	18.3272	13.7332	13.9218	15.8781	19.0698	14.0773	17.4464
246160_at	134.654	128.304	119.385	108.8	125.623	118.646	127.904	100.938	108.354	96.4192	94.5794	115.644	69.8857	109.36	89.3084	121.722	111.8	132.025
246161_at	361.862	326.652	320.492	198.737	215.483	215.187	324.073	355.22	362.859	304.676	335.837	303.496	390.698	380.748	393.654	355.767	271.128	305.711
246162_at	51.1096	59.2186	70.3812	25.3906	28.6122	33.683	45.4668	44.1889	47.0089	40.3624	51.1201	45.3866	54.7298	49.7283	49.4837	47.4766	45.8513	63.554
246163_at	6.03219	5.97792	5.95635	5.5357	5.80014	5.7999	6.17053	6.05404	6.60597	5.9456	5.55757	5.67639	6.52534	6.49031	6.23628	5.85832	5.7842	5.54457
246164_at	5.71476	5.62348	5.61863	5.48116	5.64848	5.38918	5.58549	5.72322	6.51542	5.56076	5.66498	5.48882	6.01537	6.12885	6.12885	5.4983	5.34772	5.4587
246165_at	10.8174	10.2764	9.67182	9.66071	9.71323	8.8951	10.5315	9.58954	11.0455	10.5038	15.5043	10.1609	12.0693	15.5988	14.7658	8.1325	9.19453	11.2409
246166_at	20.1978	23.4534	17.5665	22.8449	24.4008	20.9542	24.5425	23.6479	26.6867	23.1662	39.278	23.3966	24.2648	24.5859	28.7406	22.4883	22.5169	23.8185
246167_at	11.2068	11.6179	10.0807	13.9624	11.6561	12.2657	11.7605	11.5039	12.6044	11.1197	10.997	10.4243	11.3845	11.9279	12.6277	12.9173	10.2789	11.2165
246168_at	5.61655	5.52683	5.30615	5.91879	5.21946	5.335	5.44839	5.40825	5.7021	5.47981	5.19572	5.18463	5.94535	6.06623	5.9588	5.41181	5.30005	5.36048
246169_at	114.486	138.241	104.503	65.9449	95.1953	79.9262	128.23	112.768	97.1308	107.424	108.128	90.171	95.5518	112.722	92.0686	98.3473	95.6421	122.077
246170_at	442.609	475.403	430.346	576.361	572.022	496.683	559.266	564.088	580.138	638.801	651.709	642.75	465.815	486.785	475.95	591.083	578.401	669.592
246171_at	790.238	889.408	707.511	801.386	783.515	804.255	782.422	705.77	704.264	1021.88	987.424	1051.73	735.123	820.91	750.008	755.419	833.38	911.564
246172_s_at	5.27789	5.12765	4.64893	6.4211	5.61286	5.50011	4.59539	5.21967	5.20255	7.63272	5.09197	5.25884	5.46385	5.56328	5.59881	5.41581	4.98948	5.0472
246173_s_at	49.4837	47.4767	57.2336	86.9982	74.8266	77.2027	55.17	47.8388	43.9049	44.7314	54.2909	46.0628	44.9487	35.1979	32.0669	75.8074	57.3419	70.2917
246174_s_at	5.64616	5.40048	5.38254	4.98927	5.33302	4.93911	5.30724	5.21646	6.18957	5.29852	5.20276	5.12134	6.01833	6.16116	7.57899	5.23707	5.0197	5.00035
246175_s_at	20.4441	23.0997	26.113	17.99	22.3547	19.1688	19.7021	28.9634	22.9427	17.007	18.1862	21.0924	23.4265	29.6033	18.54	11.4695	24.0594	18.6002
246176_at	8.6971	9.91316	8.42009	8.3115	8.63445	8.40834	8.52309	9.81833	9.40308	7.99865	7.76236	7.65219	12.0391	13.2016	11.252	8.3464	8.1868	7.59706
246177_at	5.07839	4.92614	5.13503	4.86881	5.08111	4.7871	5.13503	5.14158	5.44257	5.03705	4.95456	4.66078	5.94072	6.27611	5.75174	4.97127	4.66557	4.82818
246178_s_at	26.9057	20.3544	24.904	26.1893	22.7577	25.842	20.9387	29.2431	26.6024	37.1591	42.1483	28.2374	33.5036	49.5163	34.3114	18.5019	25.0384	21.4885
246179_at	3.48317	3.43542	3.44503	3.43655	3.47032	3.45623	3.43458	3.49435	3.52433	3.45893	3.43119	3.44362	3.52433	4.53389	3.5432	3.42444	4.55816	3.43458
246180_at	110.819	138.927	134.311	55.9976	71.2246	61.5575	127.786	122.787	82.6473	77.9931	85.9521	85.2961	111.033	96.2332	125.569	84.4489	83.6256	96.3697
246181_at	7.52285	7.39326	7.37354	7.80906	7.20734	6.90451	7.22483	7.54513	9.13618	7.13693	7.62489	7.23671	9.48494	8.14086	8.34366	7.00449	7.10009	7.16807
246182_at	9.46547	9.41429	12.0455	7.86216	9.52632	9.94865	11.228	9.55415	14.3703	9.55454	8.30911	7.43132	9.70166	10.1726	11.1815	9.37107	10.1902	9.32653
246183_at	5.39538	5.19956	5.53683	5.50644	5.46722	5.24697	5.23342	5.1906	5.71805	6.62336	6.70219	6.3495	5.79847	5.92658	6.18525	5.36577	5.00344	4.97761
246184_at	387.223	364.675	426.843	837.67	749.485	842.986	506.979	598.646	556.756	600.949	450.747	548.291	330.045	332.61	340.525	322.314	557.74	470.768
246185_at	61.0564	80.8922	73.1039	52.1831	42.865	46.4714	68.9108	81.8297	64.8248	29.9938	40.321	26.5206	58.9637	64.4478	91.8721	44.6158	50.7289	31.7692
246186_at	5.40004	5.30288	5.14876	4.88905	5.19038	4.78887	5.21089	5.42717	5.53933	4.64397	4.78062	5.14876	5.68129	5.78586	5.21903	5.06506	5.69718	4.96923
246187_at	65.8366	53.5093	53.4808	69.3652	62.6944	56.8166	53.7748	53.7472	67.2442	52.8692	59.249	52.168	58.5462	68.029	81.1985	50.5937	38.703	43.7896
246188_at	10.3569	10.5051	8.37731	21.5106	19.4368	21.7447	13.2005	13.1816	13.01	13.5405	14.002	12.3771	10.7231	8.62771	9.21192	11.975	12.7772	16.7381
246189_at	49.2404	51.1033	45.2414	119.061	95.6224	133.401	67.2773	49.3457	62.8582	70.5115	72.4225	60.7687	171.238	147.462	166.856	88.425	75.2149	87.5952
246190_at	56.6372	72.9809	69.6078	100.367	93.1336	90.2599	64.3182	56.7677	73.426	100.851	99.5912	98.9591	49.2263	45.1987	84.5426	107.34	81.1935	101.266
246191_at	960.756	1047.1	1045.85	1323.08	1269.47	1215.33	1222.69	1201.53	1320.72	794.307	838.789	727.867	680.811	769.576	626.188	949.067	1011.92	1028.68
246192_at	717.58	730.217	730.967	1127.52	1103.83	1184.16	662.914	700.974	788.746	777.456	728.749	794.731	774.682	799.905	616.806	850.638	806.968	830.338
246193_at	54.4248	59.0947	52.6005	73.8919	57.9123	55.5314	55.2788	61.2901	72.09	68.7679	69.9748	86.9375	39.1925	36.3559	39.1869	54.7927	56.8844	57.4196
246194_at	58.6329	67.2553	72.3036	60.7661	38.4645	51.1726	70.2484	73.4833	91.334	48.0259	46.3075	43.9284	63.9507	76.8482	83.8803	44.3654	50.0829	50.436
246195_at	32.8636	26.0541	35.0666	15.9891	24.0559	16.1256	26.1436	37.0631	22.1141	41.9859	43.0212	34.854	25.094	24.3607	14.9094	47.7927	28.9206	41.8705
246196_at	33.8605	31.9302	29.68	85.0442	73.2302	87.3204	30.2959	20.296	27.7356	41.2576	43.5099	45.3381	31.2303	36.9757	45.536	76.0272	47.9825	59.9627
246197_at	190.652	164.12	155.656	67.3188	71.4048	76.243	191.025	143.48	129.626	120.308	147.714	124.88	612.136	489.995	577.037	322.493	200.673	242.54
246198_at	151.876	124.677	141.263	215.377	226.46	226.474	117.806	103.831	106.507	165.722	172.881	215.997	104.765	76.924	87.7357	184.876	215.545	171.851
246199_at	121.577	99.9807	101.058	27.6901	25.0199	27.1567	104.877	96.8678	98.321	40.331	45.6803	35.7649	96.5064	67.4309	72.9929	36.0718	28.4914	27.8738
246200_at	162.127	173.397	176.552	86.7164	69.1603	93.7285	358.393	278.59	372.992	147.85	144.845	148.264	281.212	198.929	244.676	73.2422	149.211	109.707
246201_at	409.311	473.921	423.907	568.741	550.446	548.82	414.931	460.034	449.72	483.358	591.156	570.496	351.771	380.826	315.528	663.977	620.261	706.843
246202_at	87.1341	92.2314	96.0594	88.6942	103.219	88.2218	81.3906	93.0609	75.4036	87.0912	95.8427	80.5524	67.3991	69.6221	43.8004	92.1934	84.957	79.5953
246203_at	31.6189	30.5063	22.7017	23.0954	18.2075	21.6632	39.2216	50.7091	50.8646	10.4004	11.1877	11.5406	225.383	242.067	199.239	21.8742	23.549	22.8214
246204_at	33.7883	35.6622	34.8354	51.7837	60.5419	69.4365	34.5547	29.4493	36.9909	64.5697	78.2097	67.657	35.9209	36.0037	26.9157	62.526	41.2686	55.6296
246205_at	162.447	156.448	126.878	148.544	133.992	150.832	134.665	134.598	142.589	149.058	125.675	142.847	159.458	160.734	205.54	150.349	149.45	128.916
246206_at	5.32777	5.15553	5.20961	5.1344	5.25517	5.07402	5.17888	5.29765	5.45533	5.19849	4.99461	5.04368	6.04931	6.05379	6.19212	5.1344	5.03912	5.01166
246207_at	70.6013	63.7854	74.8312	95.0468	110.696	99.6834	74.1854	80.4681	95.117	91.2722	100.481	110.152	63.0016	49.2364	46.4819	137.372	108.782	119.61
246208_at	4.97577	4.89468	4.76141	4.7275	4.84945	4.6581	4.50086	4.98313	5.33302	4.84268	5.3497	6.22476	5.24094	5.292	5.40448	4.78573	4.59463	4.93506
246209_at	17.136	17.1691	17.9156	18.3438	16.9115	16.0697	16.9665	16.954	16.8229	17.4013	15.251	17.2533	14.1239	18.7429	18.489	16.2904	19.0159	19.6052
246210_at	40.915	49.9853	39.4559	95.6106	82.4946	89.6723	51.1432	62.3004	52.1831	49.8961	39.3393	44.3836	53.6767	49.7201	37.0692	56.9709	72.1463	63.6114
246211_at	175.446	190.421	188.576	174.971	196.137	223.69	160.734	164.596	157.829	258.108	238.416	252.736	188.027	177.563	170.025	193.767	194.245	172.643
246212_at	91.4748	91.7551	72.1063	128.681	133.423	132.37	91.9571	91.3246	69.6035	179.156	138.534	175.475	89.1984	88.9587	51.9787	86.1359	98.9652	96.4449
246213_at	101.426	97.3324	112.689	150.096	163.364	135.214	106.462	118.384	100.388	152.57	173.529	140.47	110.546	110.405	100.485	157.098	168.019	212.259
246214_at	348.735	321.276	268.286	251.287	287.177	228.445	296.314	316.359	235.278	238.808	328.537	289.213	804.8	866.757	736.211	282.845	321.316	300.253
246215_at	56.3472	64.7889	68.6875	89.8861	93.2791	77.1614	69.6335	55.1291	49.5824	72.2917	52.6373	86.7395	60.0811	50.8468	33.115	51.7784	84.5531	64.048
246216_at	253.756	310.961	292.98	95.3636	144.785	120.503	254.194	244.656	218.72	230.898	222.966	220.507	302.122	287.484	271.618	237.497	257.441	299.699
246217_at	45.006	47.3792	36.483	49.6222	41.1932	49.5936	48.5854	46.6263	39.8026	37.9567	36.5941	42.9806	47.3754	43.0689	62.2671	43.1823	38.6236	44.669
246218_at	252.415	250.72	209.621	160.158	106.173	151.257	264.386	206.888	208.303	205.077	147.166	194.125	225.471	165.825	245.477	159.275	216.588	186.895
246219_at	502.862	456.214	497.071	617.871	561.706	537.199	509.558	498.297	500.759	510.773	551.826	532.147	568.765	466.064	546.682	702.819	606.405	740.032
246220_at	147.717	127.537	117.536	151.347	149.248	151.982	150.912	127.537	129.415	125.938	120.989	132.449	157.124	142.028	129.996	154.266	138.667	152.978
246221_at	162.594	154.646	282.45	373.836	290.929	330.343	176.748	152.627	146.948	395.575	370.884	346.053	265.016	280.531	244.727	405.046	350.286	421.477
246222_at	39.9254	51.7178	39.0439	76.7063	96.4508	82.9329	31.6273	31.6533	36.6377	130.563	52.5228	116.511	45.521	37.6261	41.7339	58.5799	61.084	65.7392
246223_at	153.324	160.754	167.076	192.245	206.336	182.93	175.46	158.511	147.426	191.771	137.059	161.33	153.949	101.399	107.53	179.838	173.71	179.366
246224_at	7.00046	6.88016	6.79924	6.67855	7.79335	6.52775	6.77916	6.98667	7.11907	6.78167	6.74583	6.58809	7.47817	9.71562	7.60956	6.66485	9.28906	6.60245
246225_at	136.587	118.671	125.943	342.855	346.365	291.911	157.732	150.041	140.315	207.824	159.007	192.071	68.9292	84.1961	83.7064	123.764	158.534	147.365
246226_at	115.21	106.082	94.2246	48.6184	50.3904	46.5468	80.5375	88.8309	93.469	51.2263	54.9291	52.1241	110.628	93.6958	73.9663	60.74	44.0992	57.276
246227_at	8.01115	7.01514	6.80762	8.26248	8.45301	7.11614	8.0329	8.2462	8.2462	7.77513	7.64967	7.06749	9.20587	9.55572	9.62268	7.06082	11.1719	6.86406
246228_at	59.9012	52.4506	57.9337	85.5664	62.0959	71.3799	140.292	148.691	137.225	25.0837	32.9028	23.2902	357.232	350.042	338.155	61.3316	53.7991	53.3086
246229_at	18.7876	14.7513	19.0988	5.59651	10.8027	6.46238	19.146	15.0166	24.7775	5.43431	5.52343	4.91119	6.30298	7.54854	6.99874	5.93023	7.61956	5.9478
246230_at	9.747	14.2206	9.72441	7.73038	7.45027	7.99603	7.17117	7.78216	8.62878	8.44711	10.3115	8.97935	5.223	6.38625	7.06648	7.09498	7.13649	7.08639
246231_at	40.6979	46.221	68.3638	50.9304	61.1467	49.7804	43.0857	44.4092	37.6408	37.8283	53.9009	45.8749	33.8933	26.4482	36.4763	53.149	52.1284	47.6026
246232_at	136.52	191.189	144.732	103.045	177.592	154.519	166.685	160.569	132.498	194.157	171.632	159.471	153.791	102.051	124.816	206.192	204.169	179.05
246233_at	42.3175	47.6985	40.5752	33.8265	33.4891	30.8402	52.061	39.8492	44.5517	34.1168	37.7755	40.2391	64.42	66.5777	58.1149	23.9593	28.1395	27.6117
246234_at	89.0885	96.7047	102.868	83.6617	79.116	76.5301	94.5211	101.779	79.4808	77.8459	119.674	92.0383	65.5801	88.4394	64.3288	97.4424	69.1547	80.5557
246235_at	6.58484	6.57025	5.40248	5.3486	5.35124	5.80705	4.90776	5.22482	5.55278	6.21429	5.63967	6.7597	5.74819	5.83191	6.12005	4.96535	5.16168	5.43453
246236_at	5.73852	6.8844	5.86964	5.85279	5.89041	6.27199	5.88316	5.98653	6.03046	5.87206	5.66777	5.81206	6.11829	6.46796	6.18347	5.66684	5.74654	5.8154
246237_at	158.167	177.68	185.233	133.514	131.041	136.298	155.749	143.961	145.866	112.875	149.677	126.329	94.2342	109.635	88.0335	117.039	104.147	124.194
246238_at	56.6117	55.1586	52.5142	23.5722	29.1687	20.9061	62.5516	59.4209	77.6383	18.7052	14.7889	26.2022	101.662	100.281	79.8507	36.8551	38.3454	34.5746
246239_at	39.5662	41.9773	29.2407	38.8575	40.1887	46.7068	39.6965	47.882	42.6762	41.5654	38.979	38.3974	33.5518	30.4756	28.2966	40.9435	46.7836	38.622
246240_at	58.8839	63.8261	48.8496	54.8761	45.6971	42.3426	63.7946	66.0614	59.0971	35.1705	55.1473	43.3315	53.5005	54.204	47.9293	61.7779	40.3292	45.0152
246241_at	6.70577	7.38597	8.04809	5.96713	7.46344	7.54203	8.57929	13.6286	10.0089	6.45548	6.19364	6.6133	7.66162	9.11256	9.42744	6.28488	6.83873	7.79367
246242_at	14.3774	12.9216	14.1576	14.2185	14.378	13.9478	13.6822	15.084	14.7458	14.5829	14.7498	11.4403	24.1852	21.6676	27.7094	18.9979	12.7817	18.7749
246243_at	36.9764	40.0486	38.9047	24.5002	28.1447	24.3928	39.5922	41.1019	16.4545	30.1271	30.327	25.2035	32.5727	16.6127	37.234	48.2315	29.302	31.2015
246244_at	64.5432	58.0243	55.8219	50.1467	61.0313	44.0422	52.7325	55.2017	55.8035	71.1895	68.1731	69.1887	42.6604	48.8857	42.4175	53.7163	41.533	53.4171
246245_at	125.995	137.256	145.938	169.272	176.255	154.729	158.59	159.576	168.613	143.288	188.755	182.765	124.577	119.152	109.374	81.8852	150.361	145.692
246246_at	7.32795	7.07534	7.05068	7.45547	8.71319	6.31049	7.03679	7.2275	7.50494	6.995	6.93606	6.88949	7.88124	9.15045	8.57577	7.47756	6.80735	8.41767
246247_at	186.053	191.417	186.102	143.159	146.418	123.272	188.98	158.004	199.264	147.589	155.302	170.134	215.643	161.23	192.268	213.457	170.284	205.465
246248_at	11.6928	11.384	11.1306	12.0849	11.0138	7.7388	11.8751	12.0738	11.343	9.79416	10.8054	8.43463	15.5298	18.927	18.0756	9.84498	8.16766	8.05305
246249_at	50.4484	54.7264	48.2305	113.026	114.709	119.323	69.5707	51.4858	51.7965	54.2385	51.8125	65.4604	46.7413	26.0782	28.1499	68.3596	75.4888	96.0516
246250_at	1545.8	1380.12	1355.68	2305.15	2979.57	3101.01	2913.31	2477.57	2342.14	1844.74	1435.13	1741.36	3942.38	2917.14	3287.27	1793.63	2089.42	1856.68
246251_at	32.653	33.5731	39.0279	28.6422	50.6717	43.5698	44.3609	38.5372	44.2299	179.348	192.201	168.61	45.1328	29.4559	55.1801	55.3686	58.1281	68.253
246252_s_at	378.363	316.528	382.96	94.6688	82.9159	106.304	547.334	345.016	345.456	177.505	176.067	197.837	532.454	411.317	620.848	361.023	326.351	311.114
246253_at	198.99	179.599	226.855	342.939	347.877	270.694	172.626	178.089	173.582	353.408	398.052	427.896	260.43	197.038	257.457	308.454	346.964	277.346
246254_at	7.33669	7.4997	7.56437	6.2725	6.85956	7.03766	6.96175	8.4111	6.9795	6.86463	6.46663	6.20179	9.25174	7.4518	9.0767	6.93321	6.47407	7.33397
246255_at	24.1495	20.8281	25.0405	30.6061	23.1205	27.0487	20.8657	26.3945	24.1495	27.6917	23.9726	30.7346	17.2916	38.4163	23.3208	31.0519	28.5206	31.2438
246256_at	5.16232	5.05654	5.14792	5.06028	5.21517	4.96923	5.04326	5.02176	5.10097	6.73475	5.0686	5.00776	5.44503	5.51481	5.56854	5.08486	4.93019	4.99789
246257_at	156.873	175.071	164.124	240.877	258.426	250.319	104.199	145.166	124.289	245.946	203.943	257.282	151.776	160.023	115.108	150.448	270.327	222.627
246258_at	6.5592	5.7798	6.23961	9.2986	8.91082	11.6138	5.76688	6.0832	6.0832	9.01576	5.26619	6.0897	6.76942	6.24679	6.85899	6.22476	8.73308	6.98639
246259_at	112.81	93.1833	104.714	84.8523	67.0703	74.3823	111.259	129.607	128.114	81.5411	93.0304	85.7388	85.8762	97.6668	97.3864	119.336	74.2235	83.593
246260_at	38.0324	32.9928	31.7679	15.1667	10.4314	13.1913	26.0932	24.3812	15.1362	27.6741	37.882	26.4124	45.9173	40.1293	45.2061	21.5367	14.9091	21.7465
246261_at	24.5042	24.5193	25.4052	13.5455	16.6585	12.1924	23.5674	20.6543	17.0098	13.6113	17.0364	13.269	21.6365	28.9765	20.9671	15.2372	16.756	19.6818
246262_at	11.7677	12.8591	11.1215	12.894	14.3579	12.6236	10.5103	11.946	10.9035	17.8377	14.9735	11.1115	12.3152	13.3445	13.5733	12.0827	11.9981	13.4424
246263_at	148.496	184.159	162.821	167.805	142.075	141.676	200.883	189.003	153.529	98.2624	105.21	124.023	127.815	134.4	136.064	77.5013	129.49	107.742
246264_at	17.492	17.6555	15.5793	17.5351	18.9768	20.9624	19.003	23.2983	15.0444	24.4424	21.0349	17.5348	13.3826	16.7642	13.2674	15.7796	18.668	14.8513
246265_at	73.6343	73.9799	89.6907	172.169	127.495	136.609	80.5193	91.7175	74.4265	74.126	86.9446	71.8078	45.6268	47.1191	62.9926	102.635	95.0116	89.4698
246266_at	73.9132	69.284	63.6833	121.069	123.929	134.477	92.7557	86.3076	82.18	55.2505	65.1599	61.3833	44.4082	47.1734	56.7933	92.7175	81.0819	93.819
246267_at	8061.26	7623.27	7502.12	4430.2	4696.88	4963.68	6413.68	5875.39	5611.66	6290.52	6032.89	6196.15	6536.02	6617.61	7520.32	6223.69	6363.81	6070.18
246268_at	52.6536	39.4721	56.5489	26.4108	24.7882	18.3611	43.2995	37.4318	33.9832	17.3207	25.4208	21.5221	31.6299	21.9868	25.1518	26.2458	21.8293	19.7
246269_at	11.5238	19.6072	12.4608	12.3585	12.7835	12.2067	13.7493	9.68116	8.00408	13.197	12.4171	14.307	8.29019	7.94707	12.0364	20.8046	14.888	14.3872
246270_at	277.209	306.006	251.163	81.1502	113.139	79.4221	388.937	318.314	288.975	285.038	257.388	307.695	891.383	831.123	1132.31	196.541	192.15	192.687
246271_at	5.63735	5.50825	5.47689	5.18591	5.58939	5.63944	5.49401	5.42204	5.79323	5.50101	5.29004	5.66079	6.1675	6.07896	6.28927	5.22203	5.467	6.56729
246272_at	26.3728	18.3212	17.3001	8.96185	9.18397	11.2001	18.2641	21.1453	20.4428	9.48299	10.391	8.76237	11.9701	19.0953	12.428	6.92183	12.8747	8.45944
246273_at	5.07819	4.81017	4.77708	4.66692	5.20362	5.96725	5.04243	5.38509	5.09323	6.81798	6.12822	4.73712	24.461	9.61755	25.351	7.55412	14.8733	11.6931
246274_at	6.40266	6.48365	6.29315	8.5329	6.39767	6.12483	6.75831	6.40266	7.12082	6.10473	6.40372	6.12281	6.76859	6.81602	6.80874	6.41161	6.11126	10.5267
246275_at	263.513	242.207	265.922	50.5978	56.1393	51.805	105.11	102.139	83.4781	93.1834	136.739	130.015	117.951	105.969	118.204	170.697	112.481	108.39
246276_at	128.209	130.317	127.076	128.758	144.002	124.544	130.29	136.458	149.868	146.099	154.595	131.895	86.4425	86.0457	96.9314	202.723	130.151	141.249
246277_at	6.27998	5.89671	5.52911	6.89997	6.14272	6.66157	7.02957	6.45999	6.37458	6.47274	6.29393	5.58434	8.23706	6.78752	8.07359	5.76996	5.82473	5.91053
246278_at	23.8009	25.024	25.8303	31.9761	34.3763	30.2735	28.537	22.6878	18.3197	34.7112	32.8144	27.8074	12.959	12.9734	16.6736	37.5288	33.8856	33.0654
246279_at	7.29611	6.68184	6.6269	6.37328	6.64926	6.47407	7.56095	6.87197	6.9429	6.6269	6.59865	5.51799	6.66184	6.86266	6.91955	6.44277	6.20077	6.42216
246280_at	173.875	183.314	205.018	230.084	214.891	245.926	212.32	250.411	277.847	188.941	193.211	224.022	140.866	163.022	135.086	214.935	199.608	208.843
246281_at	131.007	120.196	120.85	71.1355	94.8965	85.744	135.355	134.005	111.586	77.1852	77.9803	72.1893	89.2625	89.6281	87.8042	76.9888	89.5048	84.5687
246282_at	7.1425	6.40306	6.98926	46.8451	29.582	31.9577	7.44935	7.38688	7.66666	15.4433	18.1023	20.3294	7.52501	7.59207	7.58085	28.1401	24.5314	18.2397
246283_at	234.011	260.451	307.644	198.765	216.726	185.062	219.143	238.553	257.156	216.264	215.253	252.259	188.128	203.876	185.496	245.916	237.888	236.757
246284_at	153.981	128.256	139.118	99.187	76.7946	99.1402	170.259	151.533	137.759	125.453	73.4109	131.843	113.377	102.766	109.181	29.9507	117.285	56.8587
246285_at	89.5526	116.713	131.592	95.7088	108.946	116.742	73.0079	86.9268	52.2635	163.505	140.37	141.859	103.878	101.7	65.8852	199.747	137.056	182.746
246286_at	784.481	724.928	789.914	697.355	726.418	760.369	711.709	620.262	670.831	623.737	694.725	683.066	478.99	556.105	448.337	514.564	618.227	560.508
246287_at	48.0219	42.9699	47.9588	64.6931	76.3448	70.5202	47.5625	58.4933	35.4373	86.5491	72.891	68.5438	46.2381	53.8179	34.2663	99.9252	70.9764	92.8014
246288_at	342.306	328.827	358.157	422.256	363.74	420.577	392.943	345.783	347.277	385.01	435.897	435.432	236.436	219.386	260.612	361.735	367.456	397.187
246289_at	239.687	255.172	222.678	645.701	576.468	655.737	316.678	279.502	306.176	432.784	346.401	470.536	279.858	227.149	275.048	504.631	457.857	482.188
246290_at	1795.26	1784.89	1626.71	1760.42	1833.34	1746.09	2058.16	2004.1	2102.25	1827.7	1869.46	2026.83	1353.51	1439.14	1475.45	2132.43	2290.52	2031.54
246291_at	63.1481	53.1894	54.6983	56.5629	42.8343	54.4875	70.5173	61.2901	63.1584	63.771	78.6915	60.8861	57.1185	50.5667	71.1253	63.3741	58.4669	65.4752
246292_at	159.157	202.74	199.764	259.49	284.757	237.985	188.29	168.8	156.204	244.184	167.64	187.241	181.635	177.461	169.537	182.323	249.456	255.849
246293_at	6.84731	6.61793	6.40122	6.39715	6.2382	6.35315	6.57781	6.74527	7.55335	6.12231	6.39715	5.59456	19.0401	31.2059	30.9208	6.0842	6.22809	6.37092
246294_at	880.393	923.663	809.092	517.064	548.662	518.085	487.045	558.301	603.324	509.495	448.502	561.706	399.231	526.235	464.687	274.174	341.029	339.366
246295_at	27.0187	32.6624	35.3203	40.9823	41.1983	41.9187	24.9984	22.3607	23.7594	32.1196	34.3664	34.1062	33.9399	37.1469	28.5124	53.185	38.0879	38.0621
246296_at	28.3536	24.4269	26.2971	25.2595	21.9778	26.6779	40.6002	28.0305	17.293	23.9116	34.1175	26.5053	12.7843	17.1896	18.5666	27.7282	26.8715	23.8009
246297_at	4.94297	4.83393	5.18868	4.82659	4.86501	5.46251	4.42642	4.76415	4.97188	4.86561	6.25963	5.63619	5.52456	5.00858	4.97331	5.75055	4.1265	4.7031
246298_at	91.0606	108.421	100.843	120.414	111.309	120.572	109.055	120.098	112.81	116.521	113.363	119.448	74.0986	84.828	91.3678	73.8161	122.228	116.072
246299_at	22.9799	32.8124	43.393	48.0426	33.0572	58.8585	34.5199	54.0472	43.2435	59.836	73.3189	67.6028	436.551	319.224	472.085	115.791	145.39	99.0669
246300_at	69.4792	74.8973	83.264	46.5803	57.0154	51.9584	69.6192	70.1906	61.4741	76.326	67.2303	73.3415	65.0008	68.5128	45.0837	103.857	80.6219	93.6054
246301_at	183.374	235.612	202.224	162.24	170.172	153.677	179.307	157.047	169.433	161.688	164.874	132.025	151.87	160.589	165.777	171.689	182.998	164.103
246302_at	120.354	155.746	116.765	73.8266	90.5718	103.623	127.505	141.121	147.89	94.3233	180.924	130.461	291.839	243.513	266.052	80.2535	114.735	94.5249
246303_at	39.0479	30.8916	34.4994	20.8555	28.9135	24.966	25.2305	42.4071	28.9455	30.1915	27.8132	28.0604	22.2101	22.4744	21.0733	18.5232	23.5732	17.7281
246304_at	944.692	1083.44	1070.17	895.273	833.174	792.775	1001.35	1024.91	1004.61	1036.08	815.365	1108.1	1009.36	1049.1	1258.59	933.889	1046.26	1051.35
246305_at	119.367	115.146	125.959	80.9305	79.2592	68.8259	95.2265	86.258	103.772	100.731	98.671	108.608	199.305	230.24	274.411	144.458	88.6723	118.895
246306_at	105.495	131.716	101.683	195.815	244.882	218.927	86.0351	106.538	91.8853	184.281	145.05	182.192	116.101	130.633	98.7358	208.607	168.357	177.009
246307_at	566.421	578.057	585.921	1579.14	1423.77	1405.23	678.869	688.686	695.095	797.15	542.477	693.512	455.138	466.198	487.986	679.623	1039.41	835.917
246308_at	149.009	129.564	169.969	79.6509	93.4594	70.3813	111.387	118.272	100.582	85.9186	91.0045	84.6852	62.6623	74.2419	51.3369	61.3254	69.9776	47.1579
246309_at	31.6676	40.6018	35.589	108.666	78.1856	99.7426	42.2975	38.0848	42.1795	71.1545	71.0216	64.9474	37.3688	28.7063	46.4313	40.5669	60.9261	54.6466
246310_at	57.0821	53.0835	66.1755	34.2171	44.1799	35.5481	61.6094	78.3142	52.7856	47.1763	45.9201	56.9662	72.1107	53.8323	79.9688	40.5927	55.2731	40.536
246311_at	231.335	173.311	220.19	272.546	342.207	269.794	174.21	119.331	171.54	384.931	364.974	400.414	321.97	321.864	285.835	389.4	328.651	333.054
246312_at	73.9314	70.4825	83.7992	69.9776	59.4233	70.7755	59.0437	57.5873	57.4975	75.7326	75.7077	60.7137	125.165	135.019	150.213	72.3868	67.4821	81.317
246313_at	56.8949	47.1918	57.7615	10.5376	12.0413	10.1682	17.2681	16.0615	16.8561	12.0567	11.0196	9.62209	18.1911	13.6766	20.0425	13.1221	10.9914	12.8022
246314_at	87.6402	92.3944	118.503	151.179	159.314	159.295	99.8698	111.827	113.979	132.318	132.95	152.476	79.7933	82.8545	89.9933	125.023	133.237	130.765
246315_at	12.7685	14.5109	17.6069	16.2143	13.3412	13.4115	13.8772	11.2395	12.6246	10.5597	11.2951	10.8677	12.3796	9.46197	17.7442	15.4839	12.3517	12.7444
246316_at	7.67391	7.54203	7.52841	7.33849	6.96346	6.95775	7.3887	8.08288	7.66634	7.69379	7.45823	7.44476	8.78868	9.52476	8.48467	7.09717	6.73918	7.08901
246317_at	36.3275	35.671	51.7412	50.4442	41.8722	56.361	37.4272	43.5242	39.3959	35.0551	40.836	41.0142	22.0755	25.5496	19.7174	31.1515	41.917	39.257
246318_at	45.5266	42.3462	55.6524	32.6624	40.1573	31.6819	47.629	45.7967	51.3579	37.5427	31.9446	41.1518	41.2186	43.1256	42.9135	28.9455	44.5142	47.3578
246319_at	333.418	350.25	360.194	417.247	393.67	424.884	310.412	352.277	352.27	506.022	519.278	490.66	250.072	290.058	280.185	304.207	266.578	286.741
246320_at	162.103	178.576	210.259	184.05	205.849	180.783	238.734	248.271	307.916	194.728	166.805	184.534	136.702	139.921	116.492	150.946	193.604	207.743
246321_at	8.13885	7.69885	7.86055	7.7579	7.46712	7.30151	7.87283	8.53606	8.20431	7.45149	7.02668	7.06866	10.6188	11.2751	11.4718	7.23552	7.67801	6.96804
246322_at	62.6545	50.827	51.0141	56.6046	57.0576	64.2654	49.8776	40.5086	45.4285	62.9744	46.3284	59.8963	64.8728	25.5423	34.6172	57.9766	60.4003	56.8634
246323_at	21.9502	24.2863	22.5683	37.7166	24.8004	26.621	23.6309	26.8775	20.1361	32.6631	25.8128	34.8276	29.782	30.0523	28.4405	22.4795	36.1311	27.4804
246324_at	111.919	121.074	114.321	123.14	134.521	126.691	116.254	121.932	129.649	78.63	74.9804	111.538	96.8439	99.7796	110.789	79.3537	138.212	89.5582
246325_at	14.3379	27.8377	29.1053	20.7759	19.6883	21.7086	19.5048	13.4961	12.4102	20.9921	19.9956	22.3143	22.541	35.3762	34.4583	24.7867	19.4904	22.8261
246326_at	10.9129	11.876	11.2691	10.7099	10.3829	10.1147	12.1599	10.7881	11.2442	13.0362	10.0159	10.1218	13.1028	12.8237	12.6428	9.55533	9.76243	9.92416
246327_at	94.3078	121.372	110.059	71.7002	74.1199	80.4796	94.8906	96.8041	94.805	108.292	91.6083	134.914	225.999	213.299	205.946	127.799	106.309	122.524
246328_at	46.0533	60.4723	63.9731	71.7297	65.5128	74.0712	49.2991	60.1404	60.7312	56.9943	65.1773	58.6569	50.4981	62.4156	51.9691	61.9634	63.7474	66.7543
246329_at	50.0541	73.5981	65.934	42.0169	38.2054	49.3011	62.1802	76.1131	48.3753	35.229	37.6477	37.3565	33.9664	41.2762	39.6313	43.2551	48.4917	52.8106
246330_at	185.176	183.006	203.361	122.605	122.769	137.101	168.773	188.058	153.898	108.852	125.106	128.898	155.867	149.475	120.246	113.825	130.547	121.597
246331_at	39.0471	37.633	44.37	26.8731	27.4669	26.1694	39.7707	31.7679	36.3761	43.6236	33.3354	55.1144	38.7818	27.7909	28.2681	27.4917	27.1594	46.2172
246332_at	9.5463	8.47317	8.49095	8.82268	9.56082	12.1275	7.16336	9.20171	9.7416	9.50483	9.46742	9.34302	14.8962	20.3929	19.4624	9.49468	9.26201	11.9524
246333_at	5.77399	5.71828	5.6274	6.97893	5.8415	5.44682	5.61355	5.91661	5.95782	5.36114	6.53526	5.03912	6.61657	6.85561	6.80259	5.55346	6.0615	5.53501
246334_at	46.041	37.8952	35.9121	91.2646	104.677	90.6333	38.1513	29.694	33.9727	80.7429	71.8402	97.2685	43.0415	52.0193	32.7491	86.6861	104.699	96.9752
246335_at	32.2332	21.0167	25.8001	13.2723	15.8121	18.9476	18.2341	28.1922	15.7227	16.6083	19.6072	17.924	33.9462	26.2054	32.5479	21.1028	18.2438	18.8444
246336_at	4.38858	4.35187	4.33109	4.22114	4.34142	4.13159	4.31493	4.4216	4.58746	4.25578	4.2201	4.18316	4.74793	5.10642	5.07131	4.2028	4.20737	4.17698
246337_at	4.33607	4.17664	4.17046	3.97804	4.16122	3.97575	4.1602	4.26891	4.41915	4.09913	3.98916	4.21144	4.49052	4.64969	4.61999	4.17252	3.9361	3.99868
246338_s_at	12.0105	11.0233	11.7973	10.4664	10.0138	8.79988	11.2437	12.8527	10.3743	13.4833	11.5764	11.4441	16.2957	18.3769	13.0169	11.1233	9.22177	10.3569
246339_at	305.541	296.028	350.524	182.563	215.452	212.866	232.702	258.793	251.519	157.392	166.476	178.547	134.466	153.312	112.949	167.423	146.379	127.849
246340_s_at	33.3731	22.6012	21.7845	19.8899	23.8234	18.9449	22.7195	26.0573	27.1366	17.8385	23.3649	19.051	42.0947	34.0768	36.0111	19.9742	21.8311	17.4249
246341_x_at	4.60919	4.61753	4.43388	4.31263	4.45286	3.98867	4.39615	4.56566	4.60919	4.42278	4.3507	4.24583	4.79694	4.85862	4.91604	4.3507	4.23364	4.25893
246342_at	4.37939	4.29442	4.43187	4.72052	4.36646	4.1377	4.33607	4.74891	4.47174	4.33607	4.31298	4.53314	4.82203	4.6352	4.70039	4.28508	4.1679	4.22374
246343_at	99.6812	125.918	109.914	171.604	148.624	138.258	82.0316	103.317	101.424	142.853	163.531	146.142	123.52	107.04	116.129	191.827	184.106	169.391
246344_at	6.93236	6.61711	6.08845	8.12249	8.85827	7.06111	6.16901	7.02293	7.13107	7.00104	6.62282	7.63304	6.89487	8.03719	7.6758	6.66868	6.95289	7.83541
246345_at	77.4297	62.9926	69.425	105.235	93.9173	81.0503	70.3928	71.1749	73.1265	99.1504	101.054	92.668	66.0668	53.5973	56.7583	115.886	81.4407	80.1102
246346_at	8.05471	7.92605	7.86636	7.02264	8.68496	8.79374	6.6182	7.11644	8.18411	8.12716	9.67977	9.66864	7.1834	7.28204	5.95538	6.84942	8.23842	9.54238
246347_at	39.4008	27.2696	33.4129	29.5353	32.1051	29.9126	29.036	38.4716	33.5876	29.5729	39.6916	26.3663	22.0121	24.6334	23.4958	42.0999	30.5584	28.815
246348_at	88.7853	78.5622	88.385	67.5431	73.807	69.0695	65.7528	98.2261	76.417	67.6236	75.0236	69.4907	64.6228	67.5959	68.3077	65.0302	65.7717	72.1463
246349_at	4.85722	4.77532	4.76865	4.6107	4.68285	4.54676	4.72789	4.87782	4.98415	4.64587	4.79163	4.38299	5.31116	5.803	5.314	4.65485	5.07527	4.57899
246350_at	11.356	12.0114	12.8232	16.0671	14.3367	12.7885	16.1883	12.9375	12.9035	13.2385	13.1151	12.3679	12.4638	13.7219	13.6343	21.1497	15.2153	16.9414
246351_at	176.697	176.479	192.925	232.908	275.767	224.713	198.089	246.816	238.935	229.451	233.656	236.184	192.063	210.73	159.269	186.229	197.455	224.381
246352_at	8.61638	7.8441	7.94691	8.26621	7.60799	7.52841	8.20734	8.88232	8.38867	8.48188	7.81258	7.66383	10.6018	8.98507	9.61359	7.30511	7.13195	7.29281
246353_s_at	7.83975	7.4897	7.73181	7.10636	8.81834	7.85716	7.61659	8.10666	8.15006	7.06184	7.13972	7.22721	9.6752	10.4273	11.2707	8.69317	7.18576	7.05502
246354_at	7.38749	6.86068	7.23731	7.85635	7.29611	7.14837	6.8393	7.38749	7.49354	7.25964	7.64527	7.11089	6.19772	7.80296	7.96129	6.92752	8.20026	7.6155
246355_at	23.3108	23.1928	20.4903	50.7435	62.7343	36.6249	22.4675	29.0187	29.831	41.305	30.9805	35.3094	32.562	32.6852	27.1578	30.7978	36.2478	38.3454
246356_x_at	5.56419	5.54594	5.49672	5.26901	5.41692	5.16571	5.51957	5.64245	6.58565	5.34092	5.40736	4.97515	6.12156	6.43721	6.00475	5.41048	5.40181	5.33149
246357_x_at	8.8539	8.5631	8.65398	8.14521	8.18478	7.80392	8.43602	9.21419	9.6607	8.78399	9.48299	8.40558	9.59741	13.0174	11.055	8.45544	8.32585	7.85409
246358_x_at	7.57432	7.08377	8.21881	7.09018	7.35237	6.98409	7.17573	7.41577	7.73054	7.22661	7.11936	6.57133	8.02597	9.86482	8.18378	6.60326	6.60543	7.00334
246359_x_at	11.566	10.6223	9.1208	10.3829	8.98913	8.59587	9.41854	9.80141	10.4655	8.68353	10.8753	8.48223	13.263	12.9226	11.8946	8.52379	7.81804	8.26655
246360_at	4.79833	4.75155	4.68824	4.42205	4.77453	4.40899	4.67305	5.02589	5.03281	4.64425	4.48425	4.51855	5.2556	6.43378	6.25449	4.59114	4.3457	4.37139
246361_s_at	14.8443	13.1275	13.5372	17.6432	11.9612	13.134	13.3505	19.3969	13.4761	11.3453	10.2709	12.768	20.7367	22.9493	21.0154	12.8691	14.3161	10.1651
246362_at	10.5334	9.31351	9.31351	8.94787	8.81761	7.3409	9.76163	11.6811	13.7608	8.32551	8.11348	7.97667	12.1819	13.0394	14.5327	8.15961	7.26083	8.71641
246363_at	4.90918	5.11398	5.08466	5.689	5.09051	4.83255	5.07839	5.35916	5.22998	4.83255	5.04057	5.10349	5.37282	5.3768	5.42338	5.06548	4.95028	5.01331
246364_at	4.54638	4.52013	4.54638	4.39453	4.54638	4.35911	4.52198	4.70001	4.77983	4.49531	4.36144	4.39453	5.09406	4.77473	5.18356	4.51067	4.37005	4.40972
246365_at	12.5347	10.8149	11.0194	10.2088	10.7392	9.28467	10.9959	11.9443	11.332	10.1478	10.2424	9.98324	15.5123	16.5858	16.3336	9.07875	8.94622	8.55765
246366_at	87.2022	80.7479	88.8838	98.0931	80.997	93.7824	75.9507	77.2598	57.6773	81.8634	70.5144	70.2599	28.1274	45.9475	32.1724	170.879	105.725	110.848
246367_at	19.4432	15.3169	15.7631	29.8671	28.367	34.4767	21.6552	22.5345	24.9604	30.8611	26.0418	32.9062	11.8196	17.641	10.3765	39.7112	23.8699	36.7493
246368_at	19.3909	16.4059	18.9472	20.1353	19.4232	20.3252	13.9189	17.9635	19.211	22.2393	20.2627	20.8778	83.3188	61.348	98.5049	28.1135	20.9809	26.0541
246369_at	7.8004	8.469	7.65785	9.72281	7.57992	7.09338	6.93321	7.77161	9.04469	7.47848	8.58705	8.34502	9.12755	9.52789	9.23124	8.40558	7.32825	9.6937
246370_at	5.54207	5.42138	5.36863	7.00823	5.45533	5.35993	5.46161	5.5018	5.85375	5.36202	5.31466	5.2487	14.1996	31.3898	34.7219	8.5793	5.35993	5.51572
246371_at	83.3325	75.5493	91.9515	180.772	238.475	214.001	87.2344	92.4818	67.9272	165.152	206.31	186.988	54.2976	61.0163	53.8025	209.203	206.353	239.771
246372_at	5.93316	5.61955	5.87085	5.30854	5.56671	5.03416	5.8938	6.00303	5.8764	5.37106	5.29461	5.13862	7.01687	7.54823	7.23344	5.47374	4.99461	5.41292
246373_at	64.2364	80.3756	63.6455	51.9243	51.4065	54.2085	91.6535	82.61	76.4312	77.4584	83.6205	75.5803	51.9435	38.0379	40.389	146.966	95.3832	124.309
246374_at	69.5149	46.1309	87.1412	37.2363	27.5692	36.0555	98.3755	59.4343	44.9884	55.5075	22.0343	41.6304	33.9699	36.4913	36.4434	15.7195	85.7687	45.3065
246375_at	276.81	262.632	287.377	154.399	159.138	142.431	192.426	171.185	160.728	224.362	243.954	245.487	129.761	130.279	116.163	542.187	290.034	427.176
246376_at	105.361	77.5523	91.7175	81.7122	124.069	108.461	101.249	62.7627	86.2085	109.788	102.122	100.186	142.355	117.908	127.851	101.554	82.2747	118.184
246377_at	6.0441	6.05478	6.11126	8.93355	6.38533	6.27456	5.97302	6.50286	6.51141	6.74029	6.18703	6.89317	6.30686	7.15043	6.98122	6.64134	7.67548	6.21607
246378_at	121.647	122.389	147.668	179.691	177.577	189.867	162.114	138.048	125.34	159.347	163.075	123.677	141.754	103.308	115.033	199.731	157.972	152.714
246379_s_at	557.499	569.56	538.856	1264.23	1008.45	1444.62	493.003	561.268	563.833	698.587	923.285	863.914	349.826	347.092	322.513	951.702	935.578	830.543
246380_at	5.54343	5.66358	5.44414	6.1041	5.32777	5.76119	6.34976	5.65521	5.74559	5.55392	6.43695	6.52426	6.3149	6.74998	6.89459	5.59444	5.19636	5.19764
246381_at	7.93191	7.41181	7.31171	7.37021	7.69442	7.07069	7.6459	8.0296	7.80392	7.57649	7.45915	7.13078	8.96406	8.45405	9.18924	7.5504	6.9372	7.51019
246382_at	10.1085	9.37839	10.1122	10.2967	10.2802	9.78491	11.5532	9.37415	7.40754	10.1409	11.2816	9.75361	10.6075	11.3584	11.8332	10.3437	9.6294	10.7956
246383_at	8.63942	8.528	8.84627	13.2941	9.57851	10.8156	8.17	7.66414	8.49583	8.50141	8.33406	7.77002	9.56278	12.0639	10.0394	8.32859	8.48049	8.29853
246384_at	409.337	407.257	388.171	544.9	506.313	486.176	344.408	400.085	458.102	825.831	802.358	708.529	478.253	503.327	583.76	652.111	645.754	616.971
246385_at	9.29708	9.62387	9.38803	13.0421	10.4754	11.5617	10.1793	9.17755	11.9972	12.0129	12.8723	10.1969	10.4582	12.2844	8.53816	10.1969	10.067	10.1869
246386_at	6.69063	11.1889	11.381	8.12015	12.4135	8.61744	6.65883	8.14253	6.29289	6.83916	8.46761	7.92865	10.7291	10.4342	10.921	12.225	7.99389	13.8505
246387_at	7.96946	7.86539	7.80937	9.65752	9.3051	7.99898	7.79655	8.3016	8.75157	7.7226	7.45455	7.60424	7.22305	9.21608	7.60019	8.0653	10.8245	7.60424
246388_at	6.41609	6.3079	6.22399	6.40556	6.52721	7.12873	6.23628	6.89799	6.61195	6.45999	6.03914	5.93974	7.19551	7.48001	7.25397	6.44939	6.92552	6.28721
246389_at	39.5792	39.6053	45.5753	38.2463	51.7327	48.5475	43.9717	38.0082	42.0808	35.9283	40.9721	28.7547	40.9015	53.9109	47.7956	49.6609	49.8899	55.2447
246390_at	1731.66	1903.56	1722.44	1393.45	1382.84	1331.12	2960.11	2981.1	2863.01	1297.11	1077.4	1116.14	1908.88	1476.42	1748.53	1727.97	1895.44	1942.26
246391_at	240.902	178.451	211.602	306.906	312.362	290.941	270.922	296.813	275.682	273.606	319.526	261.668	141.53	125.121	156.348	367.163	313.287	288.383
246392_at	9.70565	9.28295	9.25706	9.42706	9.12193	8.65469	11.9264	9.39806	14.6066	10.2439	9.25706	13.1837	11.9009	11.3081	12.341	8.96185	8.86992	9.34724
246393_at	16.3588	29.3786	18.2949	18.5206	15.6962	22.8951	13.8189	14.46	14.3085	35.5846	42.3575	44.0241	17.7927	20.1958	16.0714	18.7903	21.8065	19.2358
246394_at	11.6547	11.6998	15.0123	9.84256	10.432	11.1023	11.1778	13.5862	13.7309	16.4288	11.7354	14.9784	12.0055	12.297	11.6126	14.6643	11.4196	10.3859
246395_at	13.2296	14.4238	12.2119	8.85136	8.79897	7.63194	13.5221	13.3738	13.8141	7.23939	8.60029	7.0688	11.6707	10.7845	14.9901	9.82357	9.94395	12.0894
246396_at	163.297	165.893	182.083	44.0657	69.7566	56.3078	147.614	159.269	117.227	87.473	109.549	70.5984	188.205	193.155	213.255	204.538	144.5	172.622
246397_at	6.59052	6.47088	6.78975	7.09659	6.1599	6.42084	8.40212	6.78223	10.3611	5.79537	6.63589	5.6274	6.70219	6.72895	7.12638	6.13112	5.91855	6.20816
246398_at	132.803	151.26	141.615	173.996	191.476	177.979	126.79	107.102	101.896	211.65	212.041	219.711	123.517	127.699	118.466	181.706	203.14	201.528
246399_at	93.0418	106.348	91.456	87.6978	78.4526	79.7917	107.274	84.338	90.1894	135.008	111.515	113.46	75.3107	84.3865	94.3582	107.587	92.6166	105.331
246400_at	68.8089	91.0494	69.7882	104.19	60.7212	77.8971	83.9577	96.8677	99.2686	94.1646	78.0252	68.9447	75.2551	51.2441	81.4909	77.0443	75.1624	74.5107
246401_at	45.2256	30.1735	41.3755	19.4532	16.8841	14.4395	69.2698	55.1778	54.272	19.1558	16.897	23.9672	17.7343	18.2068	19.4156	20.3824	18.2487	16.6124
246402_at	13.8903	14.2475	14.3892	14.686	12.6474	14.3114	12.8935	13.0389	14.4674	17.2483	16.4592	14.7483	14.5904	16.8699	13.6371	24.3127	10.9466	19.2722
246403_at	20.0161	16.6223	14.9871	16.3944	10.6018	14.2252	16.9707	25.4292	24.5435	13.0431	21.3539	11.5541	17.6185	11.8415	12.5146	9.48727	15.3327	14.3273
246404_at	76.9462	77.5395	66.8833	78.0156	70.7029	73.707	65.9476	80.5855	76.2884	77.9387	59.8053	58.2799	59.0146	71.7592	75.15	63.0599	71.3828	71.9687
246405_at	7.78711	7.51636	7.43406	7.23285	7.56095	7.12243	7.8499	9.09386	8.39971	7.44874	7.26546	6.59621	160.227	110.249	124.754	7.19758	7.15836	7.1494
246406_at	5.41092	5.3852	4.82243	5.02362	5.23793	5.2259	5.24999	5.77209	5.2907	5.18399	4.68362	5.34728	8.56732	5.99268	5.87471	6.0045	6.08495	5.52207
246407_at	6.84295	6.31957	6.31127	6.80455	8.47526	7.00478	6.9606	6.5307	7.15719	7.93908	7.02322	6.8844	8.54237	7.06256	7.28234	7.81932	8.42908	7.3963
246408_at	494.24	550.728	562.965	306.799	362.003	330.934	634.134	647.945	661.934	436.103	243.593	404.946	414.072	380.81	392.032	158.573	325.708	294.385
246409_at	19.6431	25.0343	30.0789	30.5458	29.3623	29.6434	28.9788	14.1588	23.7696	30.4606	15.2178	24.8662	24.9624	14.1716	24.0288	28.6333	30.6942	30.8992
246410_at	74.2906	72.2323	65.8041	67.8657	68.9391	66.6064	74.4373	70.1618	67.4045	65.0917	67.9997	67.7432	69.3822	68.3414	76.3135	67.7432	66.6064	63.3454
246411_at	5.85568	5.59559	7.76491	5.27594	4.99974	5.32514	5.32296	5.72063	7.8738	5.09448	5.46386	4.92736	5.31815	5.66544	5.34794	5.27594	5.23234	4.95741
246412_at	112.384	96.9753	113.381	100.199	116.435	123.403	107.12	109.914	110.739	111.108	102.101	118.656	79.308	65.5343	83.9785	81.5545	120.206	106.68
246413_at	5.31848	7.73356	7.2786	5.88848	5.54719	7.26187	8.65985	6.71376	6.26568	5.01043	5.51142	5.08842	6.7547	6.12231	5.59812	6.04298	5.08194	9.0564
246414_at	11.5774	10.7593	10.5051	9.47286	11.7152	11.1055	10.8695	12.0986	12.0944	9.14706	8.75157	9.44023	15.9291	15.9687	16.9735	9.64603	10.1495	9.54473
246415_at	56.5675	59.0207	60.0404	36.2292	38.6649	35.6592	53.6359	49.4949	48.5764	34.0719	36.1689	38.7738	31.1573	43.2276	27.3273	68.1255	59.8041	54.9167
246416_at	3.96482	3.93836	3.91642	3.81104	3.90421	3.71338	3.90662	3.98638	4.02323	3.86004	3.83114	3.82484	4.26646	4.42787	4.29724	3.85007	3.74278	3.79979
246417_at	60.6415	59.243	62.8763	35.1041	30.7132	34.4725	49.7487	53.439	57.8054	22.5289	28.6686	27.593	67.9997	60.5071	57.4739	24.1059	36.2217	37.1607
246418_at	26.8329	19.0088	20.606	22.8092	29.4868	29.6082	29.7325	27.5884	27.903	26.8903	33.2992	27.0276	46.565	58.3086	41.5313	27.0276	24.2151	26.6188
246419_at	43.5135	41.1543	42.5519	41.8894	42.8325	46.3189	43.9157	43.9157	47.2335	43.7968	41.2881	38.2793	55.4243	47.723	42.7323	39.4672	43.5654	40.8461
246420_at	37.1362	31.6429	31.8411	24.3938	27.0032	30.2797	32.346	36.0525	33.1191	31.8176	30.7586	25.3708	31.2939	30.3308	29.2323	28.3489	34.0446	35.2312
246421_at	542.655	592.469	625.159	394.147	389.8	410.372	598.584	505.721	496.01	574.825	721.6	614.428	728.211	579.923	671.713	652.138	425.862	463.105
246422_at	117.903	131.971	116.153	160.946	144.05	173.468	144.002	131.906	132.928	136.851	118.408	132.231	112.694	102.872	93.8749	193.974	134.466	155.155
246423_at	43.1646	42.9223	38.8799	96.9553	91.8985	80.9106	48.183	50.2034	45.3419	62.5568	78.5784	52.8898	32.645	48.8155	49.0285	93.2945	50.9189	75.252
246424_at	93.4172	115.293	118.121	117.932	122.318	129.357	115.986	110.644	93.2255	98.7642	51.0886	113.349	115.82	108.912	108.288	24.0594	124.621	80.4994
246425_at	54.6635	61.3745	62.2287	35.0983	28.0616	28.3967	58.3014	60.9511	47.2102	36.5956	50.6477	37.9318	25.8388	42.5423	23.9706	37.9848	32.2836	36.2306
246426_at	6.43748	6.37223	6.37747	6.33985	7.25308	6.367	6.04435	6.46504	6.5366	9.25516	6.35393	6.26838	6.72729	7.51235	6.77165	6.27869	6.19161	6.24063
246427_at	107.175	100.04	141.373	98.4503	99.3358	96.8697	102.659	100.382	96.7862	132.694	155.893	127.074	79.8343	83.5158	90.2728	94.593	90.5049	98.675
246428_at	20.4063	19.2786	24.2708	27.3234	24.453	36.9658	23.4611	24.6425	24.2529	23.273	31.3003	33.1068	19.6851	18.2686	17.8092	27.4246	25.4574	31.5145
246429_at	6.73005	6.70026	6.35498	8.20835	9.14556	9.97259	6.52748	7.07941	6.79226	6.81294	10.438	6.74057	8.30331	7.43223	7.35691	7.98224	8.97216	7.977
246430_at	10.9254	10.4076	9.78652	10.5983	13.2969	15.6605	8.85027	10.9434	9.59387	12.2431	10.5983	10.9035	11.8721	11.485	11.3044	8.64403	8.84518	7.9675
246431_at	9.3227	8.97769	9.04952	7.12916	9.04952	6.97893	9.06422	9.78672	10.9216	7.81788	8.9705	7.69932	12.2831	13.3174	13.0882	7.96014	7.56888	7.67407
246432_at	15.5343	16.2229	14.0643	12.5033	12.6469	13.4772	19.6181	15.745	14.8724	12.108	12.2985	10.2624	13.4573	13.5527	15.0568	12.3304	12.1994	14.0205
246433_at	24.4208	23.0513	23.057	29.0575	28.1899	22.5753	22.4357	23.2768	23.1624	27.8858	22.9568	32.6852	23.7716	23.9204	24.3437	22.1554	27.5488	20.5443
246434_at	63.1571	61.8579	78.7966	50.084	54.4215	53.8566	67.6528	77.1392	76.9146	48.8075	49.2152	46.6607	56.6384	51.5757	52.9148	59.9665	44.9137	50.2075
246435_at	13.1286	12.3238	10.9403	15.3598	12.9306	12.4812	10.8757	13.0925	13.5823	13.4916	12.3745	11.7315	19.448	15.2516	17.2299	12.6049	14.5043	14.0608
246436_at	42.9267	46.0731	49.3721	96.671	80.2864	94.5891	36.5453	43.2702	41.6774	77.4742	69.7366	88.1149	37.8454	66.9644	31.3498	80.0165	66.2095	82.71
246437_at	4.56979	4.27137	4.27137	4.70387	4.28613	4.14042	4.24967	4.38515	5.4868	4.22252	4.14621	4.33162	4.72789	4.82204	5.28244	4.199	4.00032	4.10823
246438_at	5.73663	6.16673	5.68666	6.04037	8.74331	5.88268	6.08295	5.8805	6.31334	6.10423	6.0513	5.92731	6.44965	7.99865	6.53794	6.01957	6.70026	5.98333
246439_at	25.4658	34.1182	27.6128	22.9031	25.7524	22.6868	25.8834	24.5093	23.477	27.9133	21.0902	30.8928	21.9823	22.3906	22.2818	17.3974	23.9957	19.3858
246440_at	68.26	63.2207	56.9194	48.9018	38.6998	43.1433	78.4107	79.5789	72.4939	52.6459	40.2928	50.8144	87.6222	75.77	82.9669	45.9739	55.0658	54.4427
246441_at	242.331	229.682	200.277	312.934	297.895	234.295	219.761	272.753	271.428	169.384	252.55	168.662	154.643	169.52	159.337	146.205	180.19	162.764
246442_at	175.114	157.011	142.238	176.074	172.771	184.656	151.97	140.583	119.773	164.188	189.89	199.329	123.332	136.851	135.628	150.318	170.55	171.361
246443_at	54.7118	67.6709	64.481	102.68	105.406	96.6353	73.9284	62.3631	76.1226	85.4435	126.936	102.94	46.3532	37.1294	56.5036	120.989	95.823	82.7985
246444_at	47.5088	44.8049	51.8838	63.554	50.6363	71.7032	58.5366	49.933	40.0453	47.7936	76.0069	50.1962	50.9105	41.9101	41.9101	48.1919	54.0861	52.5444
246445_at	128.167	158.219	141.562	127.702	141.536	101.229	171.034	169.412	189.298	77.5841	90.2821	84.0337	85.2681	79.2185	55.6685	125.311	119.218	110.839
246446_at	100.347	88.8984	95.8308	110.276	123.069	108.328	118.866	125.268	113.698	156.937	127.019	131.9	116.862	72.4225	103.844	137.121	147.432	135.497
246447_at	63.826	61.1919	58.7051	66.1864	59.2965	65.6232	57.9814	54.8445	42.3218	70.0783	70.6767	77.5267	72.906	60.3086	46.5	68.4481	66.8695	73.2181
246448_at	122.238	128.014	126.218	93.7363	103.738	83.1171	103.478	116.838	110.653	129.863	139.765	123.297	137.748	129.06	140.832	121.318	102.236	120.563
246449_at	16.3212	13.7405	12.2708	12.6168	12.5172	11.8721	14.7986	12.5378	11.8912	12.2145	12.0233	16.4059	12.2935	11.3164	11.0523	12.0431	17.2391	9.43946
246450_at	24.3127	30.3059	30.1185	21.1514	27.6986	25.3781	25.9644	22.2192	23.1224	23.0712	27.2505	30.0209	22.9106	23.6333	32.5072	23.8674	30.3357	28.9408
246451_at	471.068	480.192	419.731	441.048	395.38	430.859	560.185	512.644	536.229	368.348	313.101	350.228	355.972	352.118	408.455	361.958	377.912	396.388
246452_at	313.796	311.229	338.934	321.283	300.29	339.073	319.073	327.573	366.778	238.083	217.065	231.563	309.368	335.581	330.873	382.127	304.952	333.465
246453_at	282.787	244.335	266.173	174.59	221.069	225.666	317.257	264.929	310.514	279.117	260.398	297.369	409.479	378.098	342.883	332.508	187.126	262.416
246454_at	195.269	148.935	198.765	78.8872	94.0969	108.896	125.322	122.173	173.151	81.4692	87.2702	95.9392	114.919	133.791	125.376	106.08	94.1066	78.0188
246455_at	5.55985	5.67103	5.40892	5.43475	5.5754	5.10831	5.42227	5.61632	5.67453	5.45757	5.55985	6.54601	5.90883	6.30868	5.95269	5.43475	7.35872	5.40848
246456_at	4.91745	4.8001	4.78199	4.6003	4.77787	4.51771	4.77022	5.25604	5.05259	4.68574	4.59407	4.50585	5.18378	5.29004	6.26581	4.62227	4.50826	4.53631
246457_at	26.702	27.6855	25.5643	96.3538	67.6486	95.3224	30.5489	25.9042	33.8473	48.5375	42.0273	47.7613	22.7041	25.8261	24.9035	57.6678	59.2953	45.8786
246458_at	6.13893	5.81158	5.92439	8.71856	5.92682	7.85216	6.22885	6.0513	6.20026	5.86579	6.56351	5.03167	5.49243	7.90264	7.41637	6.48259	5.41292	5.24094
246459_at	14.5787	13.7823	19.6968	21.8549	13.7572	24.6952	18.4507	18.7302	16.7295	13.356	22.1677	17.361	12.5087	16.2276	14.017	26.5663	17.0468	28.3612
246460_at	275.45	275.755	306.685	448.89	461.141	471.165	463.791	402.079	456.964	306.282	350.459	344.097	255.429	222.038	270.516	484.054	383.369	470.604
246461_at	16.748	9.90502	11.035	64.6746	34.6343	44.0748	9.75401	14.9023	20.9973	18.0574	22.5938	19.6851	10.4278	10.5293	14.5563	32.7121	37.1362	32.0708
246462_at	46.8759	41.7074	41.0277	19.921	18.3724	23.1471	45.6972	39.8746	48.5894	32.7605	39.5581	34.3706	26.8958	27.16	36.8294	37.3842	37.0114	41.9411
246463_at	95.5011	82.106	85.0472	56.8279	62.8764	59.365	94.1933	99.9703	108.668	52.4367	52.5445	47.9735	614.455	675.156	622.585	71.4462	46.243	55.7156
246464_at	70.8221	58.539	42.4437	34.3213	28.7429	29.3189	49.0285	40.7088	45.8702	36.0199	31.798	33.5959	163.142	222.957	142.052	47.2199	46.1916	48.6833
246465_at	13.8294	14.488	14.7446	10.4038	11.6729	10.204	12.9412	12.876	13.5283	11.3514	11.1423	10.186	25.2554	26.7789	22.1773	11.2488	10.4012	11.0693
246466_at	368.712	293.51	384.362	159.491	162.848	153.003	186.244	225.073	214.864	129.895	104.225	122.474	131.971	113.773	148.282	91.7024	141.504	109.815
246467_at	15.1586	19.3269	13.8721	16.8949	16.2757	26.8847	14.0193	15.4731	17.547	21.8517	18.2386	18.1757	17.4909	18.0975	17.266	13.8442	18.8626	24.0238
246468_at	837.532	801.879	987.079	84.4142	76.8009	90.3117	951.116	740.457	912.276	93.2178	92.1291	95.8859	788.487	652.057	618.252	49.1253	50.6519	67.8657
246469_at	40.6803	47.2354	42.4437	57.8363	49.9104	56.7467	52.4668	44.0368	50.7664	49.7671	52.7282	45.7084	42.7604	30.7233	34.0516	72.8192	52.4043	56.2339
246470_at	7.66477	7.38779	8.43117	6.2947	6.91614	9.29287	7.5966	8.34502	10.1303	6.85054	6.49965	6.80064	8.98618	9.58501	8.38833	6.9669	5.91661	6.52855
246471_s_at	12.1894	11.3011	11.2955	9.20058	10.3658	9.48844	11.7508	11.8079	12.9843	10.2107	12.4746	10.804	13.475	18.6668	17.4249	9.94661	8.76056	10.6031
246472_at	12.0455	11.2146	10.2263	11.7789	11.0246	10.1885	11.453	12.4132	11.4361	10.8717	12.7738	11.3672	15.0395	16.8665	17.0525	9.59387	9.75923	9.78572
246473_at	9.94211	9.76604	11.2239	8.09085	9.54395	7.95507	9.41313	10.3403	10.0513	9.41815	10.2473	9.7464	15.416	13.6836	13.3242	9.32193	9.14969	8.03884
246474_at	9.49663	9.90502	12.0773	8.50246	10.1634	8.41629	8.528	9.49663	9.62743	9.03838	9.33266	8.3488	12.1509	12.2471	10.9889	8.88524	8.10948	9.25934
246475_at	13.9097	13.1913	13.6494	12.1135	11.1233	13.1108	15.4103	15.2566	12.373	19.3539	18.9037	15.211	14.7259	14.9097	14.8864	17.7085	13.5455	16.0902
246476_at	184.084	192.925	203.98	258.836	217.355	326.518	152.154	152.042	109.091	330.147	356.814	368.568	181.207	194.501	171.643	401.88	406.488	394.844
246477_at	7.95769	7.84732	8.36579	6.88298	7.12477	6.77652	7.8113	7.30736	8.53325	7.09571	7.64245	7.72959	12.2673	10.6476	8.55712	7.65376	7.65502	9.76443
246478_at	60.1157	75.5866	76.678	116.756	112.075	108.497	79.9688	76.7883	75.0791	70.3119	59.5333	83.1137	56.812	51.6117	83.4592	78.9343	80.2849	82.6574
246479_at	127.097	139.313	109.978	411.148	279.714	376.239	107.362	125.376	158.753	255.513	280.358	257.684	87.1735	91.1766	111.809	296.82	239.791	238.631
246480_at	129.74	139.101	135.053	367.185	330.398	347.499	185.717	157.586	165.777	271.942	298.323	277.072	70.7813	80.9072	82.278	294.198	268.534	269.318
246481_s_at	1958.44	1572.44	1654.07	862.212	843.852	867.612	1480.18	1450.33	1325.23	1200.22	1260.22	1278.6	1246.45	1400.91	1277.34	669.124	847.743	659.628
246482_at	233.684	272.333	230.746	158.661	136.368	195.783	215.873	231.639	200.323	169.913	159.786	164.043	163.169	149.628	144.952	172.565	164.043	143.86
246483_at	101.637	97.2705	110.027	118.92	112.643	117.405	109.842	94.6377	97.2386	98.7034	109.973	115.82	63.1402	65.688	53.4588	128.341	115.853	132.405
246484_at	53.4588	50.967	53.1348	90.2784	83.3016	88.7707	44.0548	53.8113	44.3927	65.1158	61.0338	58.4717	31.1643	35.3486	24.6658	64.9715	70.3668	64.9661
246485_at	4.01827	3.89077	3.95539	3.78717	3.90919	3.87689	3.87291	4.01827	4.06543	4.17218	3.74086	5.5448	4.22452	4.5773	4.22712	3.80463	3.63296	3.65286
246486_at	155.749	155.717	152.871	69.0567	64.5671	64.4902	156.332	139.88	127.275	64.5154	85.3102	76.801	113.019	127.066	103.836	83.7374	60.6913	59.9283
246487_at	40.8755	49.362	42.9417	27.1321	32.4465	19.3897	18.8715	25.274	17.3656	24.2011	24.7236	33.6533	17.9782	18.3875	12.5198	14.5572	18.2094	13.0718
246488_at	263.334	209.315	271.596	206.65	185.054	187.9	192.608	205.566	244.636	104.998	129.097	95.7128	190.12	137.031	140.056	120.711	107.243	106.887
246489_at	1034.55	1065.87	961.329	600.21	619.447	503.069	1029.46	1380.12	1493.68	592.347	496.601	517.702	1053.07	827.989	1141.65	738.726	684.414	608.051
246490_at	853.473	821.079	778.255	50.9524	41.0581	49.7242	1539.72	1827.4	1821.1	26.5904	24.7663	22.9088	607.802	722.074	672.652	52.6838	45.5884	55.0703
246491_at	4.91018	4.76689	4.79596	4.64473	4.76102	4.60105	4.73333	4.82957	5.1344	4.67113	4.58954	4.61354	5.01043	5.04078	5.21132	5.98161	4.56678	4.5901
246492_at	30.4006	22.2137	32.3939	22.7549	17.8869	21.255	26.1291	20.9516	23.056	19.823	29.2587	19.8198	16.7381	12.9067	11.5869	23.092	16.0275	16.3816
246493_at	15.9147	18.3129	21.7693	11.7612	11.37	10.1243	10.7938	13.6617	7.60331	13.1615	18.8494	21.0189	15.813	13.7292	17.021	19.9718	14.4781	14.7932
246494_at	13.5291	15.9386	22.3768	10.0268	9.97423	8.64527	7.06909	11.6765	11.3563	10.8769	9.40752	8.62399	13.9753	13.6396	7.39098	13.6508	10.2231	13.8345
246495_at	14.4568	15.5595	11.4492	34.0321	24.8014	25.0868	12.1407	14.3143	15.5953	16.8824	24.8336	22.0266	11.7675	8.21611	7.16322	13.2805	20.9904	18.1183
246496_at	75.9757	79.9196	70.4188	69.3538	77.444	78.588	72.7565	77.6798	62.2159	65.5155	99.3093	88.5849	71.2071	64.3632	48.0574	104.362	77.1646	94.8712
246497_at	74.5536	84.1028	71.2232	99.289	90.4752	97.035	90.8327	101.233	99.8822	70.4333	90.8308	68.6156	72.0605	61.4237	78.9764	116.449	82.3744	90.5049
246498_at	7.47203	7.77321	7.71088	7.74834	7.67548	8.37421	7.40131	7.48939	7.8264	11.6107	10.0027	8.3488	6.99184	6.11126	6.11904	7.57774	9.35838	9.63019
246499_at	54.6949	46.7519	66.974	82.8103	70.3667	84.7878	52.3247	49.8244	33.1981	76.1788	62.8311	60.2591	53.7947	36.0977	38.0739	89.3891	79.9426	72.1063
246500_at	144.014	117.068	153.267	150.306	158.635	140.936	158.883	94.8283	112.861	158.362	166.623	168.897	149.107	128.536	150.337	264.766	184.674	218.541
246501_at	42.1518	56.0586	48.6993	48.8697	50.4194	52.6373	47.4766	70.9502	45.9079	50.3366	46.7797	51.4826	25.2782	39.8222	21.554	68.0947	61.0263	61.4085
246502_at	12.7727	13.8613	12.4066	13.705	12.9269	25.3551	13.2679	14.0147	13.0603	14.2756	12.2758	22.6701	15.423	18.0389	14.533	16.8298	14.0153	15.3838
246503_at	2145.44	2453.87	2302.69	4226.4	3480.72	4083.14	2714.13	2645.61	2695.68	2164.73	2090.28	1794.37	1196.75	1641.48	1293.28	2802.21	2513.86	2589.75
246504_at	12.5038	12.5275	12.2879	12.1514	12.3669	10.4978	11.789	13.147	12.9604	14.8266	12.0658	11.9337	14.7798	21.1253	18.07	12.2728	10.908	11.7104
246505_at	131.386	116.053	146.051	110.676	114.731	101.329	126.738	179.765	132.079	98.1072	110.177	118.832	85.2103	96.439	77.9387	130.805	126.98	137.838
246506_at	467.021	596.265	518.34	559.541	615.59	589.361	447.674	436.973	446.095	1278.33	969.697	1441.71	469.908	549.88	501.253	420.007	695.924	626.149
246507_at	144.785	129.735	152.564	82.3017	92.1442	80.9704	108.644	137.121	145.268	121.627	130.483	130.853	131.667	130.789	119.64	85.6789	96.7882	109.486
246508_at	599.064	528.651	580.651	273.909	327.997	325.996	577.25	552.2	537.784	380.193	360.919	391.364	596.535	605.77	554.884	352.285	371.547	377.392
246509_at	58.1209	49.5549	53.0563	20.0449	26.5298	27.0442	29.4142	41.6355	30.3021	27.4742	28.75	26.3777	28.4843	27.8618	28.584	24.745	22.8871	20.367
246510_at	195.827	242.48	236.295	74.3456	87.3582	54.3813	198.142	200.631	188.17	91.6817	74.1687	83.7924	146.758	128.298	157.425	77.0648	116.06	107.74
246511_at	853.053	752.291	812.423	830.372	769.924	820.877	1093.81	898.515	1072.92	590.379	375.622	504.435	470.217	464.878	494.281	325.574	620.797	459.798
246512_at	40.1705	40.7288	46.8432	33.0525	28.2107	27.227	39.8239	26.0081	28.7299	30.8738	30.0332	28.3699	20.4811	29.4082	30.0332	30.4919	27.227	29.5195
246513_at	86.6896	107.424	107.065	72.1552	82.0283	83.5175	103.955	108.034	106.799	79.4221	94.4939	78.727	70.8395	85.6648	100.93	61.6765	78.0156	94.0911
246514_at	6.19059	6.67211	7.19891	15.0453	9.98775	10.7852	6.69214	6.9106	5.63284	10.9844	7.86329	7.44094	7.51095	6.15244	6.58146	9.82438	10.9697	19.1373
246515_at	48.8054	42.7411	43.2284	43.5707	39.2925	42.6096	41.7023	39.9271	35.7561	50.9901	46.5363	41.2372	39.3119	36.6709	38.649	53.7517	42.6307	46.9993
246516_at	306.081	252.186	295.263	177.315	161.748	165.559	310.01	246.381	296.356	141.586	122.797	126.34	186.964	126.254	175.511	128.684	152.157	189.976
246517_at	4.7058	4.6604	4.64206	8.39315	4.76102	4.93607	4.85283	5.467	4.88423	5.17654	4.5886	5.63851	4.83056	4.86861	4.92372	4.6352	5.22633	4.52942
246518_at	37.9965	49.4431	38.3202	61.9304	42.706	56.8167	39.434	49.0144	43.1034	78.5978	68.1451	68.3961	34.5235	36.1571	30.7871	66.5886	56.8494	55.8357
246519_at	132.945	100.31	138.836	18.6607	16.4992	13.7197	102.986	92.6338	101.564	20.1634	15.5161	28.7022	86.7181	91.4203	51.3021	13.0292	13.0812	13.2377
246520_at	29.419	27.2483	19.131	15.3882	15.5687	16.255	29.579	28.0939	25.5528	18.8952	24.8264	22.0474	24.1664	18.0263	21.7059	16.7216	18.1094	19.989
246521_at	109.752	114.354	110.662	249.205	249.006	288.928	119.706	106.933	126.241	141.583	141.833	148.746	133.802	109.138	95.5694	191.909	167.045	176.371
246522_at	97.2724	101.252	115.248	52.892	62.7794	52.9441	68.0318	53.6711	58.4585	69.3224	104.905	90.9353	61.5815	66.0275	81.9794	116.275	82.6829	81.4157
246523_at	113.633	133.344	156.976	24.233	31.3029	30.4056	137.042	130.633	127.223	27.4878	27.0043	26.5511	144.797	143.931	160.023	34.1357	33.0403	25.99
246524_at	114.709	95.2402	103.321	101.543	84.1995	96.7087	83.875	92.9693	85.5066	87.0518	88.4921	98.953	67.1241	44.1508	63.091	79.3993	89.2918	83.2709
246525_at	5.8288	5.68362	6.30065	5.63388	5.54275	10.6105	5.69905	5.85279	5.67336	5.69063	7.29521	4.77492	6.20944	7.67643	6.30712	7.31982	7.91693	5.54548
246526_at	12.3162	12.904	6.91359	7.00133	6.51676	9.23541	11.116	12.9274	9.84701	7.02062	7.13547	5.43185	6.4653	16.1008	8.31252	8.01938	9.90502	5.87266
246527_at	57.7769	64.2773	50.2313	233.636	175.237	226.66	55.2266	55.8219	45.0865	77.4297	99.2686	90.5086	53.9995	61.8922	54.759	175.007	153.45	128.922
246528_at	57.8814	71.5002	93.7477	83.9164	95.2735	89.8751	83.4284	71.3828	99.7591	53.5181	39.0961	57.8814	135.887	134.234	109.851	59.6728	79.116	85.482
246529_at	89.7957	82.705	59.532	129.187	129.983	100.106	124.693	87.0518	78.5929	124.608	124.424	143.922	140.096	137.349	142.513	166.613	117.338	131.004
246530_at	7.45272	6.4754	7.21653	7.06401	7.26351	6.93293	7.14426	7.25159	7.93647	7.20349	8.53325	6.86491	7.97602	8.14688	9.10508	7.03795	6.87055	6.95918
246531_at	6.67225	6.66813	6.92922	6.87055	6.69778	6.4433	6.90819	6.68212	6.80791	6.62935	6.78139	6.41056	7.67927	7.88642	7.65062	6.8393	6.34116	7.38415
246532_at	78.1953	66.4315	60.1947	95.5478	77.3233	99.669	86.1483	69.2769	77.5045	97.0071	79.2755	79.7524	67.1586	90.8215	75.1963	40.8142	80.7611	67.8881
246533_at	101.216	102.37	127.102	149.911	131.262	158.316	140.295	114.815	115.033	132.161	120.439	125.788	94.2071	68.6283	85.8127	135.164	119.694	129.235
246534_at	20.4227	14.7795	15.4862	23.1353	20.934	29.7123	27.6162	19.8756	18.9944	17.4435	13.1219	16.8779	8.91649	5.96235	10.3219	21.228	21.0521	18.3562
246535_at	13.8989	18.2258	14.0412	11.2266	10.6744	13.4695	16.8741	17.3293	18.6952	13.3319	11.9972	13.5918	14.9299	14.0921	14.0759	13.5918	12.8924	13.4695
246536_at	30.199	25.1126	25.6042	21.8612	26.1447	23.8699	26.3257	32.0326	23.8905	20.7461	19.6185	22.329	16.1342	26.9157	23.5383	28.0299	20.2232	24.4726
246537_at	6.09396	6.87197	5.27377	5.37857	5.10726	5.59284	6.52748	5.14327	5.21667	5.1037	6.01265	5.10999	5.30114	5.34048	5.69788	5.1725	4.98518	5.12302
246538_at	73.4184	82.6948	75.9632	148.444	120.9	120.135	84.2203	76.6796	87.0375	69.9748	83.7942	65.1265	51.9243	40.4994	47.9332	128.663	91.3172	95.6048
246539_at	119.556	99.2645	121.617	128.356	117.386	128.541	115.539	90.5086	116.206	111.896	123.165	121.737	75.4748	88.8436	85.0582	144.352	97.8315	115.729
246540_at	95.4733	94.7077	89.2478	213.641	182.095	170.354	142.084	139.788	146.514	152.536	164.833	171.006	51.8157	45.4594	43.8761	253.007	170.242	177.913
246541_at	111.008	131.873	128.451	128.072	106.834	113.677	128.193	112.852	90.0858	84.7478	108.426	103.563	117.309	109.887	112.602	179.968	156.609	125.633
246542_at	20.7952	26.4912	34.2607	22.7634	24.2614	28.86	20.8011	18.7306	11.821	33.7522	36.3768	39.8043	25.9553	28.1534	17.6958	52.6027	35.3203	35.7913
246543_at	7.23344	6.61602	6.55139	6.4584	6.63371	5.76119	6.58457	6.73226	6.78919	6.57484	6.4661	5.77233	8.02366	9.57222	14.4324	6.4661	6.36333	6.40635
246544_at	7.40724	8.32927	7.27098	6.72066	6.17129	7.06721	7.82897	7.08697	7.44629	7.28174	6.78836	6.64708	7.65973	8.7487	7.72039	6.73282	7.71912	7.28772
246545_at	5.54207	5.42672	5.35432	5.15914	5.17952	4.81867	5.18782	5.62001	6.16572	5.1186	5.1955	5.12765	6.35759	6.33907	6.21658	5.01249	5.01929	5.13883
246546_at	831.38	907.343	901.751	2418.74	2030.66	2335.56	1270.64	1230.57	1403.21	1026.76	953.268	972.07	703.454	660.048	696.654	1078.46	1678.16	1731.48
246547_at	71.9953	81.317	66.6665	73.152	67.7154	75.8571	67.6709	61.3354	55.9275	72.1908	101.17	79.4025	80.5193	77.514	66.3933	87.6907	72.0663	75.3416
246548_at	299.016	265.665	345.463	250.612	261.991	212.936	211.758	241.387	220.71	168.077	175.615	144.8	151.362	140.681	148.334	207.079	170.189	179.731
246549_at	57.91	70.3581	60.1132	76.4453	82.1193	66.219	74.5597	76.9209	64.3103	66.0126	73.0919	59.1603	26.9467	33.7439	24.8611	65.9476	60.7861	70.7058
246550_at	3835.83	3726.49	4151.29	5974.21	5659.35	5473.47	5934.58	6162.64	5738.01	2681	2831.55	2646.42	3254.62	2687.17	3531.56	6313.57	4633.65	5166.95
246551_at	5.63295	5.45774	5.21796	8.15291	13.0064	9.59712	5.16656	5.33938	5.49401	9.4444	9.26534	7.20335	4.22109	5.74955	4.17029	8.3092	9.66199	10.2319
246552_at	5.96689	10.739	5.95733	4.64244	6.88496	5.52434	5.37128	5.55711	6.18932	4.67939	5.53569	5.6274	6.31646	11.9181	5.82258	5.39339	4.91422	4.86621
246553_at	78.2563	66.1646	68.8033	58.5029	57.7271	58.539	55.9597	63.8261	87.9901	76.0818	84.013	88.7488	42.0411	62.1981	50.0151	76.4578	59.3453	79.0836
246554_at	207.73	237.468	249.795	135.62	111.369	137.64	222.321	212.011	179.742	89.3891	121.148	80.9172	155.2	198.912	187.83	168.724	134.911	171.653
246555_at	59.0814	63.5018	68.4341	64.8941	68.2754	90.7208	50.4474	55.5372	52.9007	63.9192	51.2147	65.3878	60.8336	54.2553	25.0384	65.3677	72.5982	77.03
246556_at	6.12055	6.02278	5.99403	5.88824	6.43113	6.1878	6.02922	6.42453	6.27624	5.99465	5.90253	5.62301	7.28114	8.02696	7.47878	5.803	5.63596	5.66649
246557_at	11.5852	10.1106	14.57	8.86555	8.41802	11.6165	13.0003	12.5945	10.7121	9.112	10.1917	8.60365	7.05068	11.3481	10.5248	14.8026	12.6153	9.79034
246558_at	30.0165	39.9525	39.5029	23.9913	24.5223	27.5431	31.2997	28.0939	36.2225	30.8123	27.2914	29.9236	30.1135	51.5503	34.1399	51.417	29.6751	33.5408
246559_at	87.9017	61.5449	77.9595	245.689	199.481	191.957	78.1005	90.5774	92.5254	109.004	122.03	118.761	37.247	64.7597	58.4009	131.778	136.724	137.31
246560_at	9.06664	9.35415	9.60255	8.12883	8.92181	8.32004	8.7894	9.26239	9.37262	8.66074	8.95192	7.92116	11.0165	12.011	11.1467	8.02795	6.26092	8.32551
246561_at	28.0979	22.2452	29.2798	36.75	42.8774	38.4266	24.3772	16.4575	28.6622	32.8016	46.2059	24.2509	27.9087	33.9141	20.787	38.2251	33.6885	40.1318
246562_at	213.268	346.138	291.204	250.777	307.821	317.322	137.138	161.861	106.707	314.881	420.716	386.405	99.8698	113.589	93.2255	368.924	314.655	349.912
246563_at	9.52945	9.07986	9.63474	8.95007	8.84245	8.60612	9.76182	9.60274	9.54336	11.1955	7.83943	8.45735	11.0077	11.5164	10.8536	8.75427	7.94022	7.49431
246564_at	87.5647	97.3424	102.311	153.539	125.907	137.172	97.5867	117.217	99.3543	91.3529	94.8713	108.043	74.3701	78.3657	80.107	100.644	100.446	115.482
246565_at	92.0081	80.0609	97.1028	36.8945	45.1838	37.4472	101.216	113.158	119.333	40.4246	36.8158	37.5581	91.8495	72.5297	70.9764	59.5541	53.3919	57.1185
246566_at	17.8957	17.2504	14.9828	13.0121	20.8992	16.9303	15.4839	11.5731	15.1804	17.3727	19.2722	17.3521	15.6316	15.1754	15.0735	26.0894	21.3847	22.1682
246567_at	110.39	119.684	112.495	117.84	116.991	118.656	138.702	116.148	120.92	102.018	134.571	119.252	109.046	122.238	118.564	130.499	113.163	128.509
246568_at	5.25043	5.11671	5.09406	5.44772	5.80347	8.17487	4.59199	5.33916	5.11934	9.9732	7.21771	5.52536	5.94975	5.77209	6.0892	5.74394	5.81206	6.24179
246569_at	5.06693	5.03291	5.02217	4.98108	5.02981	4.89508	4.99214	5.08132	5.14453	5.06693	4.98927	4.98764	5.4513	5.76688	5.49085	4.98927	4.5419	4.92574
246570_at	7.48585	8.08986	7.16366	6.22757	7.53088	6.22706	7.46252	7.67265	7.94104	6.91614	7.12346	6.54332	8.70103	10.2036	10.2111	7.73245	6.83368	7.01313
246571_at	6.45363	7.03737	6.28127	5.2729	6.46052	6.11854	5.7489	6.69943	6.71376	6.04907	6.60923	6.15282	7.0391	7.49447	9.53454	6.23423	6.07446	6.11552
246572_at	7.82897	8.14086	7.35781	7.63586	10.0159	6.88298	6.87818	6.77638	6.29134	7.12404	6.55893	6.86068	7.85538	10.2002	8.6921	7.23909	6.99701	6.92865
246573_at	5.73828	5.66847	5.6573	6.03269	5.63596	5.38166	5.62209	6.23013	5.94023	5.6573	5.48071	5.5282	6.06923	6.15383	8.24451	5.48883	5.54229	5.42338
246574_at	6.6509	5.64013	5.60687	5.65126	5.67266	7.13546	5.69905	5.8288	5.97449	5.76806	5.5848	5.5291	7.51605	8.06862	6.1995	5.69274	5.57769	5.67406
246575_at	35.8354	44.369	41.3628	142.651	104.415	153.684	48.2166	48.9902	42.735	71.2846	77.5841	57.1162	33.9553	32.03	42.9391	100.723	93.398	105.093
246576_at	26.6188	31.7562	25.245	21.0829	36.338	20.3227	21.8931	22.4172	30.3183	20.3778	19.9529	18.6232	17.0798	27.6304	17.0259	17.8399	22.329	19.2889
246577_at	5.43922	5.3031	5.24159	4.9448	5.14115	4.8987	5.12513	5.58939	5.61978	5.07214	4.96005	4.90514	6.39399	6.47195	6.64626	5.00529	4.72245	4.89689
246578_at	8.48327	8.27165	7.9911	6.71183	7.4304	6.65555	8.77605	9.14519	8.71534	7.60143	7.45639	6.93321	12.293	12.7727	15.0977	8.55782	7.24028	7.33668
246579_at	12.3771	12.0787	12.1125	11.6806	11.5584	11.734	12.1559	13.0035	12.5579	14.8962	11.7755	12.6891	13.7495	16.1558	20.163	11.9539	10.5544	11.66
246580_at	165.995	156.564	160.352	161.568	166.528	159.354	198.651	163.464	200.652	219.467	136.111	190.327	76.1037	76.8356	85.2296	79.5822	189.812	161.98
246581_at	8.04809	7.45854	7.43407	14.6984	14.6691	15.3838	7.43407	8.68585	8.30195	9.63475	11.2128	9.01168	8.65434	8.47422	9.18642	11.7407	11.5318	12.4746
246582_at	16.2656	10.3322	14.7313	18.9628	12.4342	17.0728	17.0286	15.0778	19.9853	17.1684	17.0496	18.1892	32.3513	25.4637	22.1791	17.4013	22.5938	19.0491
246583_at	167.557	198.467	222.152	101.172	108.8	107.397	138.707	147.96	124.503	143.073	124.913	167.254	144.464	179.116	154.951	93.7362	125.83	123.474
246584_at	33.569	30.7226	26.2534	119.196	71.3696	105.897	47.3841	43.1858	40.2457	66.2339	50.6633	66.6926	291.665	280.191	249.067	73.7116	61.1204	62.1087
246585_at	50.2911	44.8841	41.1391	54.1017	49.4269	55.4061	38.4305	45.4949	43.8977	41.183	54.0217	43.9103	37.0996	34.7069	32.084	58.971	41.6749	52.4646
246586_at	12.0569	10.1538	13.0877	12.1874	11.9893	18.2064	13.1659	13.3955	13.9544	16.3951	12.4015	11.8138	12.1494	13.2331	13.7529	13.6741	14.6824	17.4199
246587_at	4.87942	4.807	4.78435	5.16189	4.79202	4.60446	4.68305	4.08669	11.9122	4.70889	4.70541	7.45547	5.4147	5.2049	5.00529	4.69383	3.84833	4.67229
246588_at	13.5834	11.6763	13.257	12.82	13.9773	13.826	10.0048	10.8294	13.9075	13.6052	13.4667	16.1087	14.1832	14.9932	14.9256	12.857	14.2914	10.1201
246589_at	14.9379	15.586	11.8274	14.5503	14.9416	14.3556	14.4686	14.9649	15.2097	14.7719	13.4347	14.9864	15.4065	15.6277	19.0206	14.5503	14.0476	11.116
246590_at	5.72769	5.53547	5.53933	5.46296	5.59376	5.35542	5.51278	5.75268	5.82114	5.63157	5.46296	5.47846	6.41319	6.67005	6.80958	5.48544	5.4886	5.4886
246591_at	160.365	158.534	207.504	118.512	127.791	113.729	119.211	129.142	137.595	209.139	123.899	177.406	85.6209	107.943	107.536	119.726	157.405	137.949
246592_at	6.79868	6.53043	7.4616	10.2878	7.13546	7.55505	6.70219	6.82947	6.92552	6.14878	6.5816	6.52882	7.19344	7.31562	7.4246	7.50464	6.52721	7.84474
246593_at	113.353	128.409	114.091	121.293	109.914	116.249	142.718	149.844	140.093	110.657	97.1546	125.201	76.207	60.1651	64.1098	104.856	95.1874	105.214
246594_at	290.433	310.01	337.552	779.983	937.02	868.45	402.384	401.963	394.577	710.788	701.017	597.859	203.019	211.098	199.793	579.388	581.271	562.873
246595_at	5967.21	6414.6	6664.94	638.132	1297.3	1013.5	4721.55	4604.14	4512.2	3951.87	3259.37	4105.42	7853.89	6752.02	7533.31	3922.59	4383.59	4205.79
246596_at	4514.43	4057.06	4564.41	363.337	594.712	445.876	1526.52	1713.34	1616.79	874.375	841.55	1051.04	3040.28	4242.31	2936.86	976.673	1328.33	923.91
246597_at	79.507	87.2057	84.0061	55.093	53.4566	44.559	131.516	78.3592	103.738	34.3283	24.4268	30.5383	54.204	80.844	65.3596	28.0766	28.5722	32.7605
246598_at	35.4722	27.264	32.9996	28.1505	25.3619	23.8562	32.5399	41.1095	31.308	24.4534	30.7738	26.8626	27.0537	21.3342	31.9	32.1737	29.9974	26.446
246599_at	4.40031	4.27541	4.28385	4.13159	4.3222	4.09475	4.28684	4.49734	4.60597	4.24967	4.14417	4.09475	4.65313	4.75262	4.57072	4.14791	4.58238	4.11533
246600_at	31.5378	38.4953	32.8373	59.4746	50.2189	49.5692	35.9283	32.2439	32.5513	47.1482	43.6406	49.0164	31.508	36.4112	38.1913	63.2285	30.9869	43.6675
246601_at	96.7604	105.093	110.111	19.8332	43.3405	30.6124	79.0608	67.4766	64.8155	45.4855	61.8821	50.493	170.284	143.359	140.71	109.594	88.2037	92.9769
246602_at	23.0314	13.0402	25.5601	5.61505	7.71674	8.19757	24.459	18.5137	18.9944	9.67421	7.37339	7.48309	42.8061	22.56	27.8972	5.39173	15.5758	9.735
246603_at	5.11314	5.25107	5.22783	5.19465	4.37014	7.8641	5.22955	5.38918	5.78277	5.03188	5.91831	5.00302	5.2636	5.65405	5.64569	5.34596	5.24105	5.19529
246604_at	20.256	19.0691	18.4193	17.9915	18.2956	17.6983	18.0834	18.4011	25.6148	18.4799	17.4328	17.8443	20.9172	36.8415	27.8858	18.1608	17.5045	17.4414
246605_at	12.4823	14.3332	22.5799	14.8315	13.9842	10.4707	14.3038	14.84	21.0292	14.051	16.3071	11.1902	17.4206	21.6489	24.1972	13.5644	15.8254	11.8283
246606_at	5.91515	5.69017	5.90228	5.30005	5.69227	5.23428	5.80276	5.94731	7.6717	5.78443	5.5562	5.56442	7.40694	7.06633	6.97176	5.56442	5.38476	5.82952
246607_at	103.789	111.172	115.582	111.524	124.467	120.959	142.947	158.674	104.443	143.937	128.467	181.874	177.767	158.141	192.229	163.612	148.325	209.307
246608_at	5.60641	5.51459	5.48319	5.26749	5.48567	5.54548	5.49288	5.65963	5.65219	5.46273	5.37371	5.29265	6.42744	6.0317	6.02377	5.39849	5.12913	5.22955
246609_at	5.71312	5.63087	5.53933	6.68981	5.64523	5.1621	5.58205	5.86217	5.96885	5.34575	5.75883	5.16889	6.47567	6.79421	6.63944	5.24568	5.54002	5.61955
246610_at	6.01623	6.74389	6.77095	10.9986	13.1111	12.8298	6.91572	7.36038	7.02019	6.70191	8.32021	6.77095	7.33021	6.3755	7.37127	12.5388	9.13918	7.5835
246611_at	185.252	190.531	180.801	184.159	187.318	183.827	158.258	167.798	189.563	232.86	223.021	244.084	182.578	151.117	147.747	172.693	185.694	164.191
246612_at	36.6603	48.1285	35.9445	42.9241	28.7689	37.1164	37.8446	30.87	33.4019	36.6799	40.5011	36.513	141.063	133.761	134.554	28.9396	36.3813	36.0962
246613_at	974.808	923.398	971.969	397.203	389.4	432.579	994.342	929.868	903.177	382.708	339.477	288.37	603.646	621.663	649.864	426.299	435.772	418.939
246614_at	22.2631	20.3619	25.2388	21.0068	25.7413	28.5793	21.3539	29.8806	17.969	33.6001	47.2568	28.9194	25.3614	19.9496	24.6177	35.6739	39.4543	41.2805
246615_at	5.46071	5.23352	5.19753	5.03281	5.22836	4.94429	5.1907	5.41014	6.60951	5.20009	5.03033	5.83395	6.07659	6.08133	6.22924	5.061	4.88855	5.00395
246616_at	18.1952	13.5366	17.0063	24.1733	17.67	16.5222	21.134	24.0327	16.9853	22.9201	20.8383	15.7812	14.1425	12.2511	12.215	31.0972	21.088	22.1846
246617_at	50.8489	33.5449	29.6964	141.199	107.797	113.493	122.102	101.879	147.799	80.8292	96.1858	92.1763	20.9624	37.8376	26.302	122.577	100.481	107.238
246618_at	5.46408	5.36268	5.38653	8.08321	5.06381	4.86961	5.43319	5.15786	5.29309	5.07881	5.36356	5.45533	6.4103	6.14221	9.29211	5.28722	4.76944	4.75574
246619_at	693.441	539.521	661.173	420.456	540.541	478.027	726.627	711.738	717.727	457.847	465.623	474.271	551.486	526.776	519.811	432.828	450.164	404.896
246620_at	6.9055	6.67129	6.63848	6.78752	5.61597	6.86195	6.10486	6.90096	6.59716	9.4826	9.09629	6.73918	7.13444	7.53073	7.9171	15.7501	7.30511	11.7019
246621_at	893.363	994.384	881.117	662.561	665.397	783.709	985.519	1043.17	949.048	692.16	739.652	697.126	681.889	639.983	651.923	595.128	629.191	634.226
246622_at	53.2615	60.8386	48.956	49.37	51.854	54.3221	60.5295	56.6605	55.5794	52.8561	45.7685	58.9637	69.2428	48.8395	55.8173	60.8986	59.6066	55.9343
246623_at	591.788	617.288	610.655	1489.08	1247.88	1386.25	691.081	658.274	593.687	737.543	544.039	676.032	693.584	592.225	685.061	658.058	953.268	773.856
246624_at	6.86209	7.42491	6.77332	7.38264	8.13952	6.32347	6.83228	6.91614	8.88487	6.68459	6.60978	6.57916	7.29311	7.34362	7.00248	6.6509	8.27675	6.36726
246625_at	25.8632	15.8729	18.8967	20.578	20.1465	19.2722	21.5823	13.8995	18.4238	20.7717	21.9183	19.7013	28.4399	13.6169	18.5042	27.6815	14.2873	18.3679
246626_at	4.33198	4.26979	4.44957	4.43643	4.50104	4.37382	4.42478	4.01481	4.58426	5.02259	4.44811	4.43643	4.77708	4.48922	4.48112	4.43643	5.2186	4.54041
246627_s_at	1174.18	1190.55	1271.16	1044.89	998.067	1198.59	1419.33	1123.69	1133.52	1032.98	994.057	1063.81	1438.17	1184.45	1253.79	1039.49	1042.57	1224.12
246628_at	389.064	370.96	406.947	599.716	547.986	639.826	406.379	384.836	365.215	475.423	544.62	502.697	410.827	311.075	366.176	575.568	583.963	629.282
246629_at	13.4706	12.8548	13.0003	10.1889	11.7441	11.0891	13.0019	15.0401	14.3762	12.5403	12.7058	11.6811	17.9531	22.3667	16.3138	11.5385	11.3986	10.7752
246630_at	37.9209	53.7848	49.0668	20.7469	18.5034	23.9096	17.8128	16.767	15.6611	24.013	30.4494	26.5173	16.7828	15.7884	20.2868	32.0379	24.9184	24.6516
246631_at	161.608	161.449	160.853	148.557	152.727	132.677	152.614	162.982	164.488	156.744	177.352	171.752	227.368	235.593	269.108	156.3	157.221	175.057
246632_at	11.1728	14.8218	11.1297	9.83125	10.0675	8.70997	12.6391	11.9054	9.49937	9.92783	12.3558	9.93354	12.1265	10.5458	13.1902	14.2369	7.2032	11.6585
246633_at	6.84379	7.72609	6.95946	7.21075	7.03159	7.05386	7.5346	7.81162	12.0203	6.74707	9.81712	7.37976	9.03281	9.59623	9.49234	7.36446	7.20024	6.85251
246634_at	266.282	338.433	319.375	277.038	293.787	267.071	346.465	322.99	289.653	301.279	283.951	275.404	279.301	272.859	237.263	318.759	290.893	310.373
246635_at	4.92453	4.85064	4.84865	4.91604	4.87301	4.66462	4.82441	4.94723	4.96821	4.91604	5.05052	5.467	5.19081	5.06277	5.22203	4.92898	5.45511	6.16724
246636_at	3101.13	2736.86	3157.18	1448.96	1793.05	1707.08	3228.52	3074.5	3202.5	2054.61	1775.96	1998.76	2485.83	2025.95	2404.18	1584.83	1822.75	1885.73
246637_at	4.03001	3.96368	3.94435	3.85007	3.9549	3.79854	3.95198	4.10722	4.55367	3.91707	3.86147	3.8217	4.46898	4.30307	4.32007	3.87291	3.76375	3.8217
246638_at	4.70001	4.7765	5.45645	4.39742	4.5886	4.28789	4.62265	4.74501	5.51074	4.47836	4.41389	4.32931	5.11587	5.70608	5.5307	4.43224	4.25456	4.35213
246639_x_at	5.52797	5.44392	5.41982	5.15532	5.35828	5.09176	5.95905	11.5385	6.46158	5.2933	5.30702	5.09469	6.14802	6.68926	6.20587	5.30702	4.78887	5.24202
246640_x_at	14.4728	14.8767	14.8705	12.9843	14.8364	14.1251	21.7389	19.5433	16.4504	15.4623	14.9908	13.8334	15.4782	15.1773	17.2944	13.9098	14.8595	13.9865
246641_s_at	7.43345	7.1613	7.15425	6.25552	7.07011	6.44224	7.11907	7.62144	8.26384	6.85055	6.63126	6.38848	9.76604	9.18547	9.07148	6.77499	6.26066	6.22783
246642_s_at	7.89874	6.83115	7.71151	6.51114	6.78278	6.3953	8.7602	8.50002	7.3403	6.75692	6.41846	6.53284	13.2756	10.8534	9.17265	6.16294	5.73828	6.53982
246643_s_at	19.4912	15.517	15.6065	9.77668	11.2448	9.58954	19.1609	19.3031	18.2813	11.4293	11.1673	12.4946	25.6632	26.5168	29.2672	11.3798	8.63303	11.3479
246644_at	85.2138	91.3772	73.5845	38.7579	42.3871	42.7086	87.0107	84.3397	67.2262	58.7522	37.1843	66.6899	88.2218	93.059	73.8783	33.4355	64.1507	46.5487
246645_at	48.4698	38.832	45.4239	85.3943	78.9732	81.8448	50.1797	57.2571	55.297	74.6945	60.1107	70.5897	61.3379	29.0957	43.0318	89.8456	51.5862	67.6153
246646_at	5.48116	5.43029	5.50712	5.41937	5.49379	5.00529	5.60526	5.75174	5.77304	5.48634	5.3519	4.78887	6.70604	6.61466	6.52668	5.36974	5.34223	4.92756
246647_at	6.43272	6.47726	7.31321	5.69999	6.15459	5.83647	6.46716	7.28832	6.33517	6.02848	5.75835	6.27096	10.3085	10.163	8.76669	5.7489	5.553	5.74229
246648_at	6.11552	6.0124	4.99563	5.24051	5.48094	4.9819	5.48815	5.8166	5.82832	5.12218	5.26036	5.00734	5.47644	6.09421	6.78278	7.91986	5.05861	4.9901
246649_at	8.22354	7.61143	7.98552	8.19959	8.3074	8.0395	8.27131	8.38144	8.5322	9.20587	8.19959	9.08192	10.0015	8.96442	10.3246	8.17	8.02564	9.20058
246650_at	280.519	279.679	248.771	291.761	372.257	291.264	431.71	411.114	492.113	251.266	219.937	232.631	147.79	181.348	167.32	308.017	276.39	242.56
246651_at	33.9664	26.9688	42.3183	15.7767	18.4329	16.3366	22.8261	17.4615	13.5633	19.1775	18.1922	26.5206	21.3364	21.1193	20.7546	21.0258	18.9068	18.7198
246652_at	63.0327	49.1687	46.297	65.6421	80.4581	74.8281	249.226	200.454	247.293	45.005	60.3866	55.3708	22.479	20.8161	21.2511	133.377	99.4256	82.4082
246653_at	375.236	460.866	400.809	247.405	321.957	318.118	403.071	363.882	357.452	547.919	572.915	527.642	896.12	837.635	832.285	543.57	479.01	606.38
246654_s_at	102.686	89.8161	114.636	92.6187	106.729	106.95	97.6188	112.484	71.3081	109.549	100.483	104.658	58.8283	58.2703	53.5181	101.229	99.7879	80.7711
246655_at	6.7077	6.25475	6.29962	7.15542	6.30169	5.45959	6.22962	6.77554	6.50366	6.1817	6.11603	6.477	7.68305	8.51644	6.99127	6.11603	6.07297	6.00746
246656_at	6.56904	6.42334	8.59234	5.29972	6.23039	5.24439	6.19873	7.29117	6.77791	6.35746	6.62255	5.13008	7.40192	8.17168	7.67328	6.11138	6.47115	5.9896
246657_at	7.4616	8.71033	7.0829	6.44647	6.85421	5.93316	7.30511	7.97503	7.24831	6.50847	6.24345	6.36543	9.58953	10.3119	10.0443	6.38323	6.11829	6.438
246658_at	38.5712	32.2946	28.1013	31.3449	31.2327	20.639	26.7831	44.4161	25.87	27.5613	20.2334	14.5366	60.6192	52.0948	63.5314	23.4876	15.4451	17.0329
246659_at	14.077	12.2935	13.1297	11.1147	11.5006	12.2074	16.1611	13.7056	13.0963	10.9975	11.4657	11.3686	19.8303	21.8275	17.4228	10.7721	9.54983	9.18434
246660_at	627.024	661.553	627.978	291.91	342.883	349.581	539.011	507.719	570.449	373.836	398.904	431.568	566.689	799.445	615.312	447.049	424.046	491.668
246661_at	15.429	14.3088	15.059	14.9492	15.0651	10.574	14.5811	18.7764	14.9143	12.1589	13.3856	12.9473	23.5016	25.1384	24.1872	11.7656	10.7055	11.129
246662_at	18.9301	15.694	18.9683	21.4269	22.5063	28.4633	16.2884	19.46	21.262	15.756	16.7216	15.826	25.7292	25.6933	27.7225	16.7408	15.3421	16.0988
246663_at	5.62186	5.46745	5.31334	6.7839	6.4592	4.74267	5.37923	5.98702	5.79299	5.3651	4.98436	4.91079	5.86097	6.10222	6.6019	5.62093	5.24568	4.99461
246664_at	13.3319	12.8755	16.3843	10.1822	10.4436	9.93191	12.8601	13.3939	17.1614	13.141	10.1343	10.116	17.5492	21.78	18.8944	10.5026	12.0921	9.84013
246665_s_at	15.8781	13.0464	9.03355	19.8736	26.8119	17.4142	10.5164	11.7475	26.4836	22.9766	18.2776	16.5202	17.3549	17.4457	17.455	16.5555	17.3756	17.5175
246666_at	6.11126	5.77684	5.83071	5.73475	5.94975	5.88099	5.87133	5.93145	6.0528	5.87061	9.31121	5.76546	6.32555	6.1561	6.1208	5.73475	7.39417	5.68689
246667_at	9.52359	8.93281	8.96811	8.80349	8.90533	7.59925	9.01279	9.79778	9.19529	8.24485	7.80809	8.37008	13.194	12.1175	12.8174	9.1223	8.62311	8.74439
246668_at	6.6114	5.92269	5.84438	5.92269	5.68059	5.48792	5.83575	6.11552	6.12936	5.76569	5.65405	5.66847	7.39326	7.88642	8.65114	5.68059	5.18122	5.52752
246669_at	5.11188	4.79911	4.81115	4.67632	4.7577	4.60086	4.98805	4.88925	5.77755	4.74774	4.36198	4.48001	5.18719	5.28526	5.58503	4.66634	4.90031	4.66634
246670_at	16.4903	15.2422	15.3125	14.2744	15.2867	10.4162	15.5758	15.4255	14.3656	12.3613	15.0457	15.2078	16.8824	18.9956	24.8775	13.3746	14.597	12.5043
246671_at	8.03158	7.88027	7.80136	7.50895	7.74548	7.40116	7.73944	8.73039	8.24891	7.64496	7.41455	7.26919	11.24	12.4536	9.84782	7.49108	7.13576	7.32313
246672_at	5.9794	6.00253	5.89453	5.23213	5.55004	5.44638	5.87519	5.9794	6.39452	5.87519	5.7804	5.53934	7.53119	6.61249	7.07098	6.38612	4.92432	5.44772
246673_at	990.43	951.976	1207.19	478.479	604.713	514.712	781.105	872.044	940.548	403.535	515.897	441.973	449.646	682.084	556.196	560.346	479.758	395.331
246674_at	46.7375	46.3322	43.6012	69.3652	46.7375	47.8663	37.4149	43.637	47.4669	41.8739	37.7809	50.4318	47.6603	48.1562	56.22	42.157	49.5142	48.4818
246675_at	5.14601	4.94723	5.22117	4.69113	4.84308	4.49864	4.85543	5.00159	4.99707	4.82243	4.80464	6.07621	5.94438	6.02056	5.86241	5.80014	5.64778	4.55217
246676_at	8.80566	7.07737	7.36355	6.10724	7.06198	6.32789	7.60175	7.8942	7.25248	6.87309	6.72231	6.50259	9.57851	10.0443	10.438	7.04373	5.73852	5.87133
246677_at	4.79832	4.49827	4.50863	4.20383	4.45469	4.13329	4.47983	4.76552	4.5886	4.31653	4.20383	4.30448	6.08895	5.04906	4.97822	4.23921	4.26839	4.65543
246678_at	9.99165	7.72039	7.34965	6.57484	7.06314	6.91217	7.74325	8.09384	8.23842	8.0026	6.81854	6.50232	10.5069	11.0823	10.6511	6.89402	6.59974	6.5954
246679_at	6.0912	5.7489	6.03343	5.6673	6.33569	5.5887	5.92633	6.24525	6.44383	5.81684	6.35393	5.79942	8.33303	7.66603	7.86701	5.71781	5.65335	5.54616
246680_at	4.84965	4.81748	4.88363	6.73365	4.89951	4.92372	4.79754	4.45286	4.96107	4.86201	5.07735	5.74772	5.28526	5.06402	4.91584	4.70948	4.97168	4.76689
246681_at	43.007	40.5485	44.2844	13.5094	16.47	18.2296	38.773	35.398	51.1642	29.1939	30.9945	26.9466	27.3166	31.6013	29.0456	26.4461	29.7985	29.9396
246682_at	55.6388	74.6945	52.314	53.1282	58.5174	50.0274	68.9391	60.4673	49.0466	57.1256	65.8447	56.2535	113.042	110.014	133.13	84.0613	68.1535	65.8528
246683_at	24.3797	24.806	30.225	26.8362	25.6811	29.4759	28.4563	23.3458	15.4947	19.5786	18.7968	23.9982	19.7085	21.3452	19.3079	41.1611	25.2274	29.4614
246684_at	6.66307	6.68747	6.38022	5.85965	6.24846	6.15269	6.7015	6.85547	6.80134	6.5169	6.91231	7.7536	9.51772	8.58035	12.538	11.1423	9.85996	8.78633
246685_at	4.32185	4.32345	4.37831	4.18436	4.18385	4.13787	4.26699	4.4567	4.4128	5.03229	4.29759	4.13906	4.50715	4.63672	5.14453	4.29759	4.07914	4.21334
246686_at	5.13651	5.10139	4.9448	5.09323	4.90092	5.569	5.00776	5.18356	5.31881	4.93343	4.70136	4.72323	5.45533	5.65475	6.16066	4.87281	5.06569	4.77042
246687_at	14.2879	14.9852	13.3878	8.52205	9.11743	11.1668	17.9886	22.2256	11.5016	8.52205	11.6403	8.88378	9.50444	8.74474	6.23961	17.3649	15.7476	15.3762
246688_at	12.6008	11.1165	11.3192	10.3259	10.9299	9.22195	11.4459	17.8649	11.665	10.1919	10.0171	10.186	16.2944	18.9154	17.4142	10.7097	10.2517	10.5196
246689_at	8.0395	7.73769	7.70708	7.33397	7.94169	7.47694	7.68937	8.62807	8.23605	7.4042	7.33879	6.88892	8.9847	10.1338	9.87739	7.29731	7.05966	7.50279
246690_at	6.55004	6.52641	6.50179	5.57586	7.06895	6.32581	6.42427	7.26561	6.74334	5.76688	6.44012	5.85087	8.24485	8.35051	7.97896	6.91217	6.0374	6.37171
246691_at	5.81636	5.55574	5.66777	5.78301	5.8576	6.94918	5.91272	5.52979	7.37082	5.58274	5.56945	5.26684	7.57712	5.9132	7.03881	6.09421	5.29287	6.17535
246692_at	5.36566	5.29102	5.24191	4.98436	5.26262	4.91604	5.25291	5.47824	5.43074	5.17548	4.99092	5.05031	5.98456	6.51141	7.44874	4.89991	4.86351	4.79005
246693_at	7.16601	6.85097	6.82709	5.88848	6.8755	5.77731	6.68624	7.39326	7.2501	6.80357	6.05715	6.69489	9.9513	9.20001	10.4903	6.7313	6.64667	6.32087
246694_at	7.63006	7.07287	6.9996	7.08217	6.65527	6.61942	7.14118	7.6503	9.38706	7.02278	6.35459	5.89151	10.162	10.1272	10.7071	6.61235	6.97993	6.82849
246695_at	7.66509	7.91986	7.12287	12.7775	12.9094	14.295	9.23731	9.34263	9.30051	18.2693	9.20852	11.1581	8.22219	9.63099	7.86217	10.8623	9.05547	9.11668
246696_at	4.77787	4.88022	5.59422	4.84069	4.5837	5.52252	4.85902	4.94764	5.01269	4.62797	6.20026	4.88263	5.24439	5.11293	5.36114	4.55031	4.52161	4.34535
246697_at	4.36646	4.26962	4.25841	5.68853	4.29636	5.88316	4.25211	4.41008	4.47229	4.33038	4.37041	4.22565	4.70001	4.63444	4.78337	4.38335	4.29001	4.21663
246698_at	7.5566	7.4997	7.63963	7.31291	8.4111	7.17603	7.3884	7.8696	7.46773	7.51265	7.32133	7.1666	10.2317	10.2049	8.87466	7.37566	6.07072	6.33361
246699_at	114.919	103.994	99.0853	321.554	283.357	274.45	100.363	89.9564	101.312	246.522	334.907	258.474	103.321	63.9113	88.7999	185.458	184.644	181.009
246700_at	6.82723	6.63589	6.47407	6.46052	6.70053	8.34365	6.60109	7.31592	6.95746	6.37301	6.22195	6.04261	7.62051	8.07292	8.44711	7.72737	6.11578	6.10047
246701_at	391.147	388.713	430.187	277.551	340.217	320.795	339.519	364.166	320.216	360.534	462.82	502.655	316.021	333.794	338.614	540.652	512.875	454.68
246702_at	1512.39	1627.78	1565.23	1265.33	1508.17	1413.22	1989.91	2083.17	2158.78	1529.63	1254.77	1512.14	1803.09	1744.23	1929.38	1199.53	1695.2	1598.49
246703_at	47.9372	48.9903	50.5293	36.6016	35.6007	33.5174	45.4893	34.0614	34.095	42.778	54.1929	39.451	18.8781	18.343	19.5585	60.6639	47.1676	60.0984
246704_at	9.40308	9.04246	8.92804	8.9847	9.03355	8.5301	8.93428	9.49546	9.43171	10.3119	8.87539	8.855	10.2351	11.9612	11.695	8.19959	8.46831	8.59093
246705_x_at	4.64339	4.54228	4.53612	4.3985	4.46476	4.32185	4.51048	4.6627	5.84462	4.45286	4.40646	4.30024	5.32821	5.96101	5.11041	4.41842	4.242	4.30042
246706_at	5.51776	5.364	5.4265	5.12576	5.3486	5.02733	5.08842	5.60641	5.67126	5.21624	5.07422	5.21025	6.09696	6.42876	6.24756	5.12744	4.9625	4.98293
246707_at	6.30402	6.34168	6.32269	6.66485	6.21582	6.04311	6.30842	6.24705	7.78791	6.14979	9.23807	5.96615	6.60191	6.95317	7.96881	5.9981	8.33167	7.48416
246708_at	161.138	172.013	122.429	156.223	142.566	137.68	137.284	142.449	136.733	107.627	117.55	102.598	124.416	111.296	123.176	135.025	139.674	145.029
246709_s_at	13.3445	14.0429	12.126	10.1043	9.6607	8.29445	12.2275	19.7791	11.9617	9.76524	9.31198	8.91064	20.1614	22.5447	20.9095	10.2082	8.08155	8.88926
246710_at	6.82779	6.56944	6.6717	6.25128	6.56944	5.72251	6.63698	7.25055	6.99069	6.50099	6.86844	6.09834	8.52572	9.42706	9.16135	6.35733	6.04869	6.58674
246711_at	6.54614	6.45177	6.75553	6.08358	6.31503	5.81337	6.37681	6.61494	7.06619	6.334	5.95159	5.71934	7.55521	8.19387	8.88797	6.43219	6.03442	6.21748
246712_at	10.4836	9.71163	10.2342	10.0435	10.5953	9.64722	10.3829	10.6744	10.4745	10.065	11.7499	9.75441	14.6234	11.7383	14.9766	9.15534	10.438	10.2958
246713_at	4.54676	6.90819	4.3302	4.27945	4.26979	4.22895	4.28666	4.52588	4.51178	4.30042	5.9912	4.76435	4.74911	5.60042	4.95781	4.79576	5.08361	4.15217
246714_at	35.1314	32.6115	38.1521	49.4431	43.3333	50.4132	37.9583	38.4589	38.8543	35.5145	38.0707	37.7592	36.1192	38.7396	31.3866	53.6238	37.4088	49.0325
246715_at	7.40024	7.51358	6.52212	6.23807	6.63126	5.84558	6.75331	6.96861	6.84998	6.58241	6.76497	6.12332	7.0287	7.39326	7.36235	6.48792	6.71321	6.05802
246716_s_at	9.27476	8.38299	9.04227	13.5158	7.51126	10.8256	8.19807	10.3754	8.69371	8.83084	9.2923	8.30552	12.2343	17.7041	13.2377	10.028	7.93957	8.54325
246717_at	9.31925	9.37261	9.61517	13.9057	9.13167	11.5375	9.68653	9.04246	9.14443	9.10882	10.257	8.86773	9.27533	9.36568	9.85146	8.8539	10.7721	9.99247
246718_at	5.62163	5.41425	5.38056	5.89526	6.93748	4.84169	5.48995	5.53297	5.68946	5.54138	5.52956	5.26165	5.76948	5.87978	5.80371	5.50734	5.94975	5.25301
246719_at	6.99672	6.6717	6.54735	6.18538	7.43926	5.90568	6.64517	6.74043	11.1618	6.35472	6.20026	5.89308	8.3694	8.84881	8.66465	6.5839	5.86121	6.21467
246720_at	9.90502	8.94713	9.56671	8.69996	10.2662	9.56554	9.37724	10.273	10.2126	8.80566	15.4582	8.53431	13.4822	13.3067	13.9063	9.01965	8.45857	8.66465
246721_at	13.7332	23.074	17.5139	22.0909	19.3388	20.6704	23.0305	25.0559	24.6395	23.1291	43.1451	22.5716	28.5992	30.9907	32.7498	18.4864	29.6215	17.9222
246722_at	4.78612	4.3222	4.34196	4.23921	4.83433	4.71276	4.20142	4.80345	4.89588	4.78612	5.96125	5.39538	4.95496	4.98027	4.96311	5.0057	6.20383	4.71276
246723_at	4.26646	4.19969	4.18316	4.09694	4.19969	4.02687	3.99113	4.15712	4.38299	4.54508	4.05525	4.06543	4.48664	4.68305	4.63406	4.13363	4.03084	4.06543
246724_at	19.4168	21.056	23.8959	26.7185	18.9076	23.7618	19.7604	21.8562	15.4706	28.3245	38.9983	35.4198	24.9307	17.7704	23.5258	40.2102	35.2326	32.5673
246725_at	8.20532	7.65533	7.67801	7.41607	7.66918	6.38061	7.59519	7.75662	11.4723	7.79431	7.43803	7.32043	8.11482	8.3639	8.39833	7.44904	7.51945	6.41688
246726_at	4.65543	4.55592	4.54918	4.45798	4.52793	4.36969	4.53482	4.70001	4.96454	4.514	4.35571	4.42878	4.98825	4.98764	5.18356	4.38876	4.36377	4.407
246727_at	13.6494	14.0562	13.3072	10.9106	12.2829	15.3964	15.305	13.6774	14.8608	18.749	16.2136	15.2943	19.0503	14.8181	20.6942	14.0834	15.6791	14.6691
246728_at	168.981	220.76	174.641	270.105	277.893	277.027	142.385	122.384	145.968	273.364	249.456	342.63	177.097	157.836	165.196	184.265	261.502	225.452
246729_at	11.9183	11.3733	11.3507	11.0074	10.7289	10.5296	11.2867	12.3773	12.1659	11.2654	10.7978	10.9461	16.0565	20.0046	19.867	11.1595	10.3633	10.7112
246730_at	1192.63	1141.08	1102.95	1542.5	1489.05	1715.98	1133.28	910.366	875.489	1316.76	1253.33	1165.05	663.759	681.622	723.499	1312.76	1121.38	1063.92
246731_at	11.0291	12.2079	11.4511	11.6695	12.5476	17.87	11.4182	7.91628	11.2312	8.78219	10.9398	13.1167	7.88092	9.06664	13.6057	15.3654	12.688	9.66745
246732_at	28.2188	29.8549	30.1036	29.122	28.5253	28.3711	27.0398	27.4021	27.131	42.9294	36.6814	34.764	22.7335	37.1179	24.4459	26.8903	45.2024	22.7335
246733_at	8.65505	11.3376	11.3731	31.9531	18.3607	24.8586	12.2942	11.2098	13.1489	17.3375	13.4438	14.8611	12.3952	11.6298	13.4592	18.4875	20.6882	19.1613
246734_at	6.1822	5.99415	5.91977	5.80514	6.07047	7.06401	5.90034	6.27225	6.12961	5.9794	5.82904	5.89163	6.43193	6.44462	6.78808	5.93145	8.74044	5.75954
246735_at	277.448	233.982	236.922	245.119	221.96	226.334	303.44	259.405	249.18	217.663	218.433	220.507	245.058	222.902	223.397	275.269	214.82	239.82
246736_at	54.2274	56.6419	50.0767	34.7911	32.1631	32.6906	49.9627	25.8176	43.3529	27.7236	23.8361	38.4526	34.7197	25.7604	26.7152	31.2438	29.3991	29.0623
246737_at	23.0026	18.9539	20.9396	22.2156	16.261	16.9976	17.7431	22.5901	15.0772	23.3721	31.5974	19.2268	11.7217	13.1615	12.1997	25.2808	18.9675	20.5611
246738_at	72.1789	74.1016	67.3769	57.5094	62.3105	63.5331	63.5618	62.1827	64.4981	55.6639	47.0611	59.5504	52.7975	57.1866	71.8594	47.2859	55.347	54.0151
246739_at	5.14686	5.58756	5.80657	7.44109	5.37989	5.64106	5.25452	6.02724	6.54036	6.87959	5.73828	5.95587	6.29574	8.96037	7.26173	5.48477	5.27182	5.32668
246740_at	10.7417	10.2869	9.79778	9.50756	9.80584	8.12549	9.7344	10.2393	10.1384	9.40656	9.50756	8.66287	12.0515	13.3988	13.9446	9.21533	7.6274	8.95706
246741_at	244.716	271.272	227.163	369.454	190.578	337.531	228.849	255.986	239.86	301.948	246.452	298.494	243.313	223.865	270.96	294.79	319.926	254.027
246742_at	294.488	335.609	278.007	220.806	256.544	255.45	283.217	271.998	286.07	267.214	258.002	275.28	287.885	318.602	299.072	246.138	263.594	296.454
246743_at	18.8425	13.2114	16.4329	28.523	20.0762	27.0698	16.4113	17.2433	14.4135	26.7393	32.4711	24.2384	12.9982	24.6932	17.2051	22.6728	22.8749	21.3005
246744_at	486.735	373.652	466.839	604.924	501.501	573.256	515.621	553.154	548.065	429.401	482.713	387.859	2466.55	2749.98	2586.13	707.7	595.751	541.919
246745_at	798.74	963.602	770.446	1846	1921.94	1746.27	710.263	826.663	812.523	1026.78	877.812	1028.22	571.446	594.333	661.595	1458.15	1060.39	1167.85
246746_at	59.8766	64.8089	59.6067	85.4399	59.625	64.3367	78.327	69.3481	73.8585	45.2842	41.8619	33.894	46.5688	47.7721	49.7487	65.3838	57.7864	58.1352
246747_at	3425.96	3762.95	3688.88	4616.73	3844.03	4235.87	4024.19	3813.05	3375.39	3697.37	3812.43	3595.82	2731.58	2671.43	3156.01	3017.2	3513.47	3119.4
246748_at	19.9894	14.9146	11.4638	6.30739	9.4575	8.87102	10.3418	10.0272	9.24073	17.4758	14.7874	11.4372	9.80705	12.7788	11.6497	13.2328	11.8223	9.20152
246749_at	103.998	82.2545	71.6149	138.839	91.488	100.735	98.4119	106.777	114.199	98.8576	130.178	98.7035	98.1374	92.8968	120.256	105.218	105.443	98.3231
246750_at	10.988	10.8641	10.4115	14.9612	10.8036	14.8132	13.745	11.4784	11.0228	14.5133	16.193	15.1835	16.9735	12.08	21.3005	15.1985	15.0617	17.8407
246751_at	5.47419	5.64361	5.4265	5.34509	5.33697	5.07151	5.35982	5.54116	5.51799	5.41581	5.19166	5.96885	5.95758	5.82162	6.06524	5.19166	6.8393	5.09239
246752_at	7.74389	8.38385	7.79111	7.25129	7.81034	7.78535	7.76683	6.28695	7.69253	7.85538	7.31592	7.24117	9.33151	10.7938	7.02957	8.73218	7.97307	8.18949
246753_at	4.62341	4.55779	4.53836	4.3222	4.59011	4.28684	4.54396	4.68305	4.71393	4.45432	4.33857	4.471	4.9774	5.20576	5.0416	4.39128	4.45487	4.33999
246754_at	4.5886	4.35786	4.52496	4.32718	4.28983	4.0882	4.21369	4.35786	4.47413	4.27927	4.05542	4.32718	4.80404	4.77964	4.75613	4.1573	4.25456	4.27558
246755_at	73.7434	78.282	83.533	138.494	84.8558	111.46	91.7496	94.0679	71.3462	71.824	63.0366	97.7672	26.7394	63.6585	57.2383	21.7832	107.645	47.185
246756_at	55.2584	62.9202	54.998	73.7524	96.17	88.5486	67.1282	88.3052	71.5825	82.0553	75.63	73.701	35.1286	35.8458	45.6184	91.6535	77.5969	83.4626
246757_at	33.9134	31.3363	31.3363	25.4899	28.9991	31.6494	31.2489	24.1753	52.2925	30.9424	28.1609	26.2399	61.3531	56.0148	67.5598	35.3791	30.9398	29.3201
246758_at	4886.3	4500.64	4610.28	8431.27	7463.69	8672.95	5535.32	5687.78	5465.72	4809.84	4595.35	4539.81	2742.7	3082.4	2824.57	4893.03	6285.09	5799.02
246759_at	38.3328	44.2544	56.1623	23.0835	27.6701	23.1386	39.8713	46.6033	33.5435	44.7736	36.8945	42.1397	29.2017	32.9319	15.6232	45.2043	40.9519	44.6139
246760_at	68.4706	78.4333	69.4707	36.0081	49.5264	44.8454	53.2506	60.6216	64.0809	42.2992	50.155	41.9652	55.2447	56.6582	61.7424	42.524	45.1597	45.9588
246761_at	4.43625	4.40809	4.40809	4.38713	4.40031	4.29459	4.40031	4.44957	4.52254	4.33857	4.30024	4.38713	4.89468	4.79419	4.98313	4.23121	4.13532	4.19969
246762_at	14.9895	17.0991	18.8831	40.2283	36.3223	40.7414	19.0366	18.3054	19.694	24.2758	20.3056	18.6488	13.2049	16.381	15.4319	33.7654	34.3318	32.7484
246763_at	423.873	426.326	425.477	248.934	299.231	256.07	432.135	532.716	473.279	276.958	273.724	263.756	495.928	359.337	374.451	345.499	302.929	333.959
246764_s_at	8.21308	7.51698	9.08043	6.86491	8.42736	6.55704	7.50094	7.82575	7.86119	7.16219	7.03419	6.55058	10.865	9.51811	9.32768	7.07941	6.73558	6.93891
246765_at	42.8008	42.7534	48.5096	137.745	89.8455	130.977	47.8644	50.5044	47.2665	61.4792	72.1923	66.9107	63.6794	80.4962	75.3633	115.839	104.081	118.277
246766_at	11.3137	11.2821	10.7983	11.2358	11.4982	10.8681	10.8815	11.8142	11.9509	11.3341	11.2045	11.1439	14.7561	14.2955	12.8069	11.2525	10.9984	9.98714
246767_at	41.384	39.6501	40.7514	142.344	129.386	142.031	42.1769	35.0846	42.1769	77.5858	71.0975	47.6731	31.3956	34.163	50.3977	94.0043	93.9058	93.1088
246768_at	67.5238	52.4948	59.4013	64.8675	51.379	56.7234	44.7185	60.8623	57.72	64.35	80.0971	65.1291	33.5918	41.9695	41.7528	54.6736	42.1734	46.3665
246769_at	5.27962	5.29591	4.97332	7.94104	5.28353	7.99833	4.5218	5.52366	6.42189	9.08341	5.14136	5.73852	5.0325	5.11419	4.96984	6.9606	5.01455	5.21196
246770_at	30.746	23.8866	22.1481	32.6994	32.5279	32.6416	19.4908	28.4843	19.3862	37.3343	35.8494	34.3742	23.3995	28.249	26.9788	48.0732	32.1823	32.3626
246771_at	24.7541	23.4862	25.8388	15.3977	15.8433	14.692	21.4	28.0449	19.8883	15.9137	18.7953	20.1068	29.3743	41.6492	37.1332	21.4916	11.1902	14.6366
246772_at	52.7509	52.917	44.4192	84.659	79.6361	76.0302	69.0283	58.0719	74.7421	60.9261	49.8561	56.0079	31.5708	51.3295	30.3314	50.6602	62.9589	67.7251
246773_at	7.90848	7.87412	7.92214	7.54885	7.89744	6.7917	8.77605	8.81543	8.47143	7.80585	7.66729	6.43219	8.72609	8.62027	8.57507	9.51068	7.20261	6.9372
246774_at	8.09916	7.71943	7.96063	10.138	8.47491	9.42706	8.11582	7.86959	7.90686	9.77969	8.27267	8.54202	7.74898	8.13116	10.2721	7.5566	7.62395	7.35569
246775_at	142.625	151.758	156.602	251.649	201.983	258.649	148.792	171.46	181.702	162.767	184.409	158.85	131.692	127.476	184.356	227.014	212.888	197.743
246776_at	11.5333	12.7575	11.3044	14.0055	11.364	12.3006	13.1637	11.6916	13.3538	16.0519	11.6107	10.0911	10.9686	11.4427	11.8133	11.0002	9.99371	10.6757
246777_at	25.3192	22.9196	18.0152	13.7897	17.8421	22.1759	37.0745	32.1764	42.394	41.5953	27.2186	46.0713	172.807	158.466	192.913	30.5791	34.5355	37.5049
246778_at	174.053	170.83	182.668	129.522	135.575	149.961	171.865	130.606	150.528	154.151	146.304	169.934	141.62	137.132	115.236	161.535	153.734	165.179
246779_at	168.247	143.748	140.136	321.527	282.624	293.48	237.38	237.058	213.343	213.76	186.75	179.322	182.615	161.824	173.86	119.399	201.718	193.147
246780_at	461.321	444.943	501.974	726.657	680.964	681.524	499.752	525.133	545.18	428.371	429.922	420.456	356.25	348.993	322.115	611.633	531.514	548.234
246781_at	317.818	362.524	451.738	148.349	145.764	170.249	350.401	395.25	374.312	240.442	252.716	281.316	500.431	501.748	586.705	268.633	261.545	287.791
246782_at	71.6413	82.2679	50.1447	36.555	44.713	40.8092	45.2228	55.6068	61.3896	81.5144	47.3053	81.5043	60.4872	46.8259	55.0793	43.9482	55.552	53.185
246783_at	16.3128	14.9609	20.2041	7.99077	9.35127	8.0847	16.4403	18.8189	13.9644	10.6538	12.0706	9.85206	13.0976	13.3467	14.0744	15.1716	16.5273	16.4477
246784_at	94.8829	66.5708	73.6586	83.9233	72.3273	75.4253	93.9405	77.4854	90.108	68.6311	76.5018	72.6728	68.5748	59.4477	63.2805	84.1166	65.7636	58.8548
246785_at	392.661	403.485	444.231	309.089	280.554	352.741	465.299	356.983	377.912	415.529	305.981	385.406	888.021	876.209	733.856	376.394	356.236	349.08
246786_at	112.306	117.806	134.129	99.7182	116.249	111.68	162.327	133.311	129.676	105.465	72.921	84.6851	113.265	84.5809	96.5936	92.4134	136.84	123.759
246787_s_at	10.4226	9.56632	9.71163	8.81906	9.1358	7.44782	9.77186	11.6849	9.43113	11.3106	8.43359	8.54308	14.084	15.4312	12.9314	8.46831	11.2469	7.49216
246788_at	8.90278	8.70568	9.00354	8.2178	8.59588	8.22861	8.64332	9.04172	8.93171	8.49653	8.37903	8.05868	9.92049	10.5562	9.82801	8.28661	8.30979	8.02366
246789_at	139.118	160.263	158.864	220.511	243.663	263.914	224.298	190.163	181.002	201.453	202.707	184.758	176.056	173.96	174.268	214.393	189.804	191.433
246790_at	19.1114	18.3996	18.6461	28.8885	23.7228	29.8855	20.0556	20.9172	13.8949	18.4541	29.1101	27.5839	29.1628	21.3005	22.7139	28.2246	25.6095	26.1936
246791_at	96.9295	97.1228	95.1854	70.8294	64.1586	53.2342	88.9149	77.1598	84.2774	100.841	82.0906	112.377	99.2339	131.257	136.916	65.4792	79.8589	79.79
246792_at	8.5077	8.21645	10.2015	8.60047	7.71278	7.47325	7.99143	9.27876	8.25434	7.95736	8.17739	8.81218	7.57836	8.86154	8.44919	7.85474	7.28174	7.75344
246793_at	29.1364	28.0098	28.5945	25.6127	25.5496	27.5465	34.2804	32.4631	31.1157	24.943	26.8682	35.0724	44.7792	28.271	24.9337	19.5208	29.1316	24.2051
246794_s_at	35.1055	29.1448	30.5245	32.9075	42.1587	36.7901	28.6016	28.0593	24.8499	30.9284	34.9157	27.3627	27.8343	44.9949	32.0985	46.6761	32.1117	37.3274
246795_at	10.435	9.7276	11.0156	11.3225	9.2719	7.92718	9.63376	11.4966	9.90624	9.4717	10.6018	9.07148	13.2696	15.3113	17.3906	10.0482	8.08022	8.42459
246796_at	24.7816	18.6783	23.3745	31.3569	22.7083	22.618	20.0449	23.4563	15.9677	29.2479	29.568	25.991	30.0159	22.1127	30.2151	29.1735	23.2472	23.6867
246797_at	16.9686	15.5867	27.7726	56.8657	58.7944	52.7585	28.2617	24.0297	30.2884	30.4118	30.2636	30.9411	23.0646	18.4503	20.4651	37.3642	32.0827	28.4131
246798_at	9.12305	9.77728	8.19286	8.6971	9.04395	12.1444	9.0202	9.88876	11.127	8.28899	8.6871	7.7226	9.89445	10.0848	10.0369	9.09798	8.25197	8.81978
246799_at	54.2196	47.0167	64.8968	45.4631	47.4318	48.012	65.365	61.4514	46.1555	43.7842	42.2645	45.7253	27.1723	36.1593	43.5188	44.6598	39.9549	41.5808
246800_at	258.979	227.789	287.118	249.733	208.989	231.021	340.7	290.833	271.038	208.611	163.156	200.113	194.253	199.342	164.279	212.08	242.974	259.879
246801_at	170.55	235.051	233.895	710.088	567.808	618.302	212.137	199.62	171.188	399.625	438.555	344.139	166.422	174.415	126.363	619.879	535.129	489.07
246802_at	32.179	56.8821	46.5325	17.7949	14.4933	13.9223	32.275	26.9118	25.448	20.2398	14.4301	16.1651	16.0644	27.3166	16.8115	21.4718	14.7847	17.6062
246803_at	28.2606	32.9549	34.8011	31.6585	23.6731	34.1848	24.2758	26.7382	28.191	28.5758	36.7493	29.8954	27.9076	31.2117	36.1133	24.9799	29.2984	28.1447
246804_at	10.506	9.76042	9.84579	9.67421	9.93436	10.2696	9.70924	10.0048	10.379	9.58087	9.66705	7.61456	14.3839	10.8838	10.832	8.83646	8.60824	9.56279
246805_at	12.9428	11.0559	11.3626	12.0708	17.2278	9.95396	10.2882	12.0223	11.2179	11.1737	10.0542	10.3974	16.3763	18.6814	18.1772	10.5705	11.7479	9.98427
246806_at	10.2032	10.6398	9.96133	9.8851	9.97771	8.62736	11.6188	10.4192	10.4064	9.29708	8.45544	8.40903	15.5643	13.632	14.9901	9.09985	9.93844	9.2248
246807_at	24.9358	17.3877	19.4168	32.5299	24.3097	24.9676	20.1589	23.4188	18.9542	19.3468	19.2011	18.3694	20.251	15.0419	15.9756	20.3787	24.2529	22.8083
246808_at	18.4049	18.2723	15.5617	30.0579	21.7496	29.1185	19.051	16.9074	21.0976	18.5567	18.9652	18.2813	19.1405	15.1256	19.6052	22.2256	21.3241	18.2393
246809_s_at	58.8984	54.9381	63.2857	136.475	121.352	153.129	68.7948	75.5897	85.6701	61.5601	47.0022	45.4081	65.6489	56.2997	59.9123	64.4531	92.809	76.2868
246810_at	7.47756	7.12609	7.12609	6.19721	6.72784	6.10223	7.07069	7.74516	7.5902	6.64435	5.86627	6.58944	8.26587	8.0395	8.01049	5.63295	7.87347	6.21556
246811_at	4.16567	4.10587	4.08434	4.03432	4.04228	5.01888	4.09038	4.14178	4.25526	4.00641	4.02438	4.00526	4.50752	4.61999	4.42387	3.95019	3.96922	3.8648
246812_at	6.53003	6.27869	6.23321	5.5505	6.00228	5.46094	6.20663	7.50494	6.66211	5.88945	5.67791	5.44481	7.93093	8.45544	8.26044	5.77731	5.43319	5.54503
246813_at	12.4173	13.1211	15.1985	9.22442	9.62149	10.9785	12.1939	14.2083	12.6127	11.1051	11.2589	9.08752	19.0143	21.2642	19.948	9.68176	9.61675	10.1877
246814_at	11.3598	10.5883	10.7245	10.3812	10.385	9.8466	10.8539	11.6542	10.9205	10.849	10.4034	10.1143	14.3255	27.3661	14.9901	8.4111	13.5121	10.3386
246815_at	11.9664	16.0154	15.3166	19.8936	21.3649	21.3851	13.8149	14.7274	11.0584	20.6729	25.8287	24.147	11.6719	13.8958	12.9622	15.3003	16.5069	16.18
246816_at	5.50203	4.82114	4.58022	9.65951	6.16547	6.65951	4.68064	4.64034	5.05477	4.92058	6.65664	4.9626	5.59709	5.49435	5.26684	6.45455	6.62962	6.37458
246817_at	15.6753	16.0348	15.5905	17.7398	18.1742	11.708	13.9263	14.5748	18.9045	15.0747	15.547	18.9332	16.7628	21.1288	16.4268	15.899	13.1502	15.1735
246818_at	36.984	32.5352	39.4964	32.9048	42.1016	34.7561	30.9449	32.1843	21.3601	47.5079	58.177	42.2506	32.0906	27.2225	40.9158	61.2901	47.3909	53.2878
246819_at	44.7194	38.6117	40.4047	26.6686	22.7512	20.6072	40.1507	46.0845	54.2876	29.7612	33.4081	21.8854	76.9066	74.503	71.4591	29.3581	20.354	21.9845
246820_at	50.408	43.5224	50.8823	51.1117	40.2829	38.077	40.5236	35.414	30.9843	53.2933	41.8877	51.4097	28.0224	30.8446	25.5213	45.8494	51.416	30.6898
246821_at	10.1388	9.97197	12.0862	9.68375	9.88125	9.51811	9.98509	10.018	10.6371	9.83205	10.6871	12.4229	42.6254	57.7342	38.1349	9.37031	9.25516	9.60925
246822_at	50.1993	49.5702	49.4238	71.5281	67.0111	77.0695	39.1821	50.4909	48.0574	81.4039	62.3579	76.7788	39.0343	37.5173	42.0092	45.4921	63.7632	57.0986
246823_at	7.8383	7.53645	7.50587	6.9315	6.87197	6.15775	7.50433	8.31628	7.96554	7.9711	6.47194	6.13339	10.276	9.14894	13.7716	8.70782	5.81135	6.83761
246824_at	166.545	169.419	184.538	103.989	119.198	101.092	163.975	146.864	150.881	127.285	113.586	107.371	170.795	171.329	146.52	133.953	114.392	138.764
246825_at	858.396	568.38	629.062	1155.02	1100.82	1073.85	1121.36	891.659	904.57	1323.79	1232.92	1404.45	622.15	576.444	690.5	1218.18	1119.45	1156.92
246826_at	20.6657	30.8579	21.6431	55.3709	46.1205	53.208	19.3265	31.319	21.2223	76.7741	53.9907	63.0223	13.6968	10.5953	14.3029	44.6607	57.6394	40.5011
246827_at	29.3201	29.6258	27.9236	26.0391	27.4511	32.6416	28.5177	24.599	22.0356	41.6578	38.3722	45.6277	13.4817	19.8153	21.0604	33.3142	33.2097	32.0359
246828_at	11.339	11.5591	10.6343	10.6684	11.1579	9.09555	9.9264	11.6602	14.6941	11.7207	14.8141	14.9738	11.0857	16.0588	15.3898	10.455	8.81489	8.933
246829_at	126.805	100.996	139.255	132.552	148.331	151.322	83.1478	113.754	77.9227	128.277	157.318	127.82	73.0169	84.6086	80.7048	75.4222	118.598	109.338
246830_at	492.457	642.235	554.849	823.223	882.457	832.747	775.685	643.384	624.236	602.457	417.076	547.064	387.62	436.928	399.445	472.017	676.796	555.945
246831_at	378.176	368.432	357.496	267.653	331.036	272.557	681.608	708.908	747.118	168.863	132.296	141.993	1001.76	693.626	993.241	181.054	248.485	225.425
246832_at	179.293	186.727	166.288	195.414	196.775	189.555	199.084	193.787	171.703	237.409	206.099	228.061	308.797	253.808	301.923	192.419	235.37	195.093
246833_at	6.80986	7.20024	6.45018	5.90956	5.86145	5.94633	6.4153	7.32946	7.08028	5.77209	5.94462	5.78515	7.67801	7.77257	7.62082	5.60134	5.48747	5.86699
246834_at	7.59613	9.93885	9.34801	8.99098	9.21684	8.8867	7.61613	11.8609	10.8112	9.18585	11.3929	8.95633	12.9508	11.0677	10.8628	9.08155	11.8021	9.36184
246835_at	5.88848	4.92493	4.85902	7.30091	5.86145	7.58085	6.12533	6.02897	6.67279	6.5248	7.73181	6.69558	6.07721	5.48544	6.63235	6.01265	5.64848	8.68817
246836_s_at	5.87302	5.30157	5.39428	5.07235	5.142	4.98313	5.37525	5.92147	5.09155	5.12555	5.08069	4.77787	6.11126	6.89119	5.68199	5.05571	4.97986	4.77003
246837_at	76.1788	69.7509	64.7876	89.7423	106.483	111.878	103.071	77.8555	96.542	95.4811	84.1476	79.6247	47.3481	58.3661	42.9258	101.299	100.789	102.32
246838_at	19.1083	22.0973	21.8374	35.414	27.428	32.9224	21.0881	21.1444	22.4246	22.0465	21.9021	16.7711	26.2345	21.2324	22.9747	23.7121	21.6587	27.0109
246839_at	25.3395	23.7784	16.6462	26.7152	26.6911	26.349	19.0565	22.4929	20.5122	19.1672	38.3044	25.3812	25.3687	22.6012	23.2873	29.6288	34.8512	29.1795
246840_at	61.6575	67.2607	59.3221	75.3308	74.0347	61.7893	56.3622	60.9624	58.226	62.431	82.5624	77.7643	74.8004	76.4923	71.9436	114.234	81.007	109.549
246841_at	4.90353	4.8157	4.80385	5.07568	5.88848	4.6333	4.80799	4.90273	4.97005	4.78101	4.70001	4.65696	5.19315	5.51572	5.44996	4.72556	4.70793	4.69615
246842_at	52.4528	47.3355	39.8754	75.5415	42.558	72.734	32.0701	36.2165	37.6346	34.3713	30.7087	31.0104	30.7169	39.4421	38.1733	60.8348	46.0183	51.1169
246843_at	277.448	251.148	295.742	138.076	158.433	136.293	294.978	276.856	301.068	221.769	259.613	239.791	175.338	163.948	176.988	210.717	205.431	222.385
246844_at	50.7081	53.7384	44.6689	53.6678	51.7136	60.9862	66.2081	55.5063	52.9844	53.5489	48.8677	46.7874	48.5455	57.7769	36.0718	78.4688	55.0974	62.5645
246845_at	357.203	436.561	399.166	714.462	678.201	725.107	519.192	466.83	436.31	666.054	705.248	610.755	294.875	286.47	263.226	607.801	531.056	614.934
246846_at	70.5028	80.9155	76.7489	155.823	128.42	137.776	45.0967	70.4536	37.4864	94.5949	116.507	95.2969	102.475	110.794	90.3638	87.5072	98.3452	104.173
246847_at	164.154	179.16	191.142	36.8687	34.5795	30.2785	106.173	94.4493	74.8681	49.7528	57.1303	58.4825	67.189	43.7968	64.0967	32.9319	37.7957	36.9703
246848_at	8.74331	8.57683	6.88129	15.3276	8.57683	13.4551	7.60346	7.88934	8.5112	12.5883	10.3599	9.31734	9.4717	9.66983	8.37008	7.95638	11.6955	9.48084
246849_at	132.95	189.867	156.641	122.098	160.391	140.473	141.052	151.502	141.168	165.934	147.899	140.6	122.148	111.515	100.334	140.924	153.955	166.918
246850_at	25.8096	26.489	36.4149	120.463	95.9431	129.113	32.4358	33.942	34.329	33.7141	45.624	38.0332	33.4878	38.0887	38.5768	94.5056	80.1514	86.1129
246851_at	8.998	9.22669	8.69139	7.45578	8.03455	7.26471	8.36081	9.88145	9.2944	7.94528	7.52965	6.6591	11.7992	14.1707	12.4342	7.95311	7.03795	7.37324
246852_at	213.076	234.795	203.027	428.274	371.677	465.251	209.229	208.847	228.75	388.425	421.684	403.104	165.314	151.942	167.299	245.351	309.845	279.255
246853_at	13.7284	14.8528	16.254	32.6832	22.2654	22.1668	13.2193	19.8789	19.6451	34.7418	22.6957	18.3411	20.7261	16.3209	16.1528	17.8198	30.8162	20.1113
246854_at	57.7959	47.6897	53.5907	198.414	151.689	185.831	87.1019	97.2465	77.9291	257.79	281.535	263.572	22.986	31.8384	29.7728	192.648	132.944	151.278
246855_at	1529.91	1378.11	1650.4	1074.42	767.729	1292.14	1827.25	1125.84	1150.14	1247.19	1297.03	1505.48	1118.64	978.259	1168.21	976.913	1292.14	1076.01
246856_at	94.9921	129.224	107.353	149.364	120.399	147.668	129.256	121.892	126.711	151.092	101.56	152.263	99.4645	80.6815	123.677	105.916	135.698	124.882
246857_at	7.12068	6.7168	6.70577	6.51462	7.44079	7.5125	6.69806	7.24653	7.16601	6.70467	6.04832	6.57309	8.49077	8.96387	10.1831	6.41688	6.32685	6.38114
246858_at	49.2	64.9848	66.3061	41.322	53.3688	50.1261	85.9609	72.912	69.6235	48.9018	68.1619	53.2812	541.831	584.924	512.202	76.9683	51.5969	72.3392
246859_at	4.44957	4.38353	4.38299	4.18591	4.40574	4.16927	4.36556	4.44975	4.54507	4.30307	4.32078	4.18093	4.79498	4.77787	4.73333	4.32291	4.24269	4.28191
246860_at	10.3225	10.1422	10.7249	12.8411	14.2159	10.1393	9.83044	10.1209	11.1714	15.9513	15.0599	15.8	11.1838	11.4014	11.3953	11.0636	10.8717	10.4329
246861_at	180.319	184.122	179.514	86.6131	58.3541	92.554	260.644	242.854	262.179	88.9715	121.747	105.756	223.617	155.589	173.229	87.9504	68.665	73.5195
246862_at	235.119	222.636	208.038	226.185	255.881	222.49	252.207	254.257	286.658	330.466	285.683	286.458	195.936	187.896	213.142	297.454	222.673	247.314
246863_at	436.775	475.735	410.667	722.727	531.58	654.822	578.567	531.885	590.865	634.538	593.98	626.046	756.32	789.655	636.052	720.356	593.785	615.237
246864_at	119.032	109.932	114.712	117.593	133.709	120.691	100.659	116.593	128.546	85.6402	124.085	80.9438	122.63	173.358	143.648	107.256	106.069	117.574
246865_s_at	235.303	225.763	213.439	418.612	401.18	481.961	254.34	222.609	214.072	314.978	191.378	228.07	184.8	188.957	197.35	352.017	364.016	378.098
246866_at	4.00213	3.95831	3.90582	3.88294	3.97804	3.79979	3.93626	4.07194	4.42205	3.91642	3.95815	3.84769	4.30024	4.36646	4.35571	3.86846	3.85561	3.7811
246867_at	4.34427	4.30236	4.38011	4.1265	4.27348	4.06693	4.31086	4.45158	4.46146	4.1667	4.15952	4.11364	5.22547	5.13356	5.3304	4.23538	4.03266	4.10351
246868_at	67.9146	58.2954	85.2244	52.7878	52.182	64.6586	118.707	99.6588	107.576	67.5751	77.9115	70.7624	63.7985	38.7834	65.412	74.9481	65.2295	89.5232
246869_at	13.0517	12.1514	12.1894	8.78471	10.5069	9.21722	12.5028	13.7586	15.0856	9.95315	9.39343	8.87721	18.0196	20.2277	19.3786	13.2252	8.21915	9.60057
246870_at	573.327	555.476	543.994	260.435	255.723	269.728	704.278	696.939	732.304	254.429	114.178	219.44	650.065	737.921	622.111	14.7123	242.45	75.4206
246871_at	8.74942	8.25977	8.26808	7.68006	7.99012	7.43834	11.3339	8.44434	8.5793	10.5825	8.77119	10.391	9.562	9.94661	11.1563	7.64481	7.77848	7.52006
246872_at	7.39022	8.99874	8.70854	9.16211	8.50316	8.65505	9.53533	14.0061	15.0599	11.7745	10.2781	16.4585	8.56662	8.94934	8.96848	8.28696	6.79952	8.36149
246873_at	5.24353	4.90414	4.89991	4.7275	4.83473	4.66519	4.95537	5.04388	5.1825	4.84945	4.7275	4.57805	5.73287	5.62278	5.60526	4.77846	4.69943	4.70619
246874_at	5.69391	5.5505	5.19273	5.48702	5.20533	5.52797	8.64581	5.77209	6.48206	5.50056	5.49717	4.68747	6.14549	8.17806	6.00105	7.93158	6.83312	6.23525
246875_at	5.5448	5.78491	5.76309	5.88945	7.122	6.01413	5.91272	5.95562	6.65527	5.85111	5.90107	5.55597	6.2023	6.91444	6.4762	5.98456	5.81827	5.85375
246876_at	7.88092	7.75503	7.76459	7.67076	8.69674	5.80014	7.69664	9.21722	7.95344	6.97062	7.70645	7.66225	8.08122	8.49688	8.32209	7.73435	7.43346	7.62301
246877_at	5.34443	4.90575	5.02238	4.82144	4.85124	4.62911	4.96331	5.08132	5.1477	4.79202	4.79222	4.70329	6.04608	5.62532	6.08145	4.74579	4.68998	4.72265
246878_at	7.69442	7.04952	7.27845	7.19876	7.34694	7.57401	7.23344	7.75185	7.77289	7.32043	8.11848	6.29574	10.0048	8.75265	10.4672	8.50456	7.09076	6.69586
246879_at	60.4586	65.0743	70.0351	149.134	147.498	155.688	75.8665	71.8269	73.1279	100.847	121.126	100.071	58.2822	59.9911	50.7258	100.087	95.2441	102.248
246880_s_at	1490.19	883.201	1447	230.084	248.924	241.204	694.825	824.121	643.397	264.044	275.818	345.676	1006.96	700.14	842.986	127.765	265.398	184.561
246881_at	10.8481	12.5362	16.3642	23.0257	30.3158	29.0742	16.7188	16.5032	24.4509	34.2522	34.5462	32.3553	13.0624	12.9673	21.0612	24.5889	31.0111	37.6477
246882_at	21.867	28.7111	24.2599	63.4809	43.2427	64.6016	26.9201	35.627	26.656	36.6513	42.1154	34.5774	25.3281	22.6198	21.2585	31.4705	45.2265	30.5232
246883_at	4.22738	4.77159	4.16858	4.07646	4.20504	3.99983	5.96247	4.21698	4.34017	4.08518	4.08854	4.04394	4.51678	4.59463	4.67229	4.01267	3.98212	4.03979
246884_at	9.56023	10.0633	7.68937	11.6303	13.3269	11.469	25.99	22.7307	18.0048	8.41387	9.07372	7.35826	28.7748	27.3408	33.7772	11.6475	11.3789	7.48309
246885_at	21.9381	20.1954	17.7486	10.2962	22.4348	14.8114	22.4735	28.2675	29.4844	29.1508	29.8941	27.9948	18.0708	12.903	20.9301	27.525	21.2594	27.8869
246886_at	97.4105	76.943	73.4411	58.8863	70.1215	66.549	88.5594	98.9592	70.208	80.1563	74.8112	71.5414	65.306	70.0898	57.7627	74.3945	65.1613	64.5008
246887_at	4.96862	4.85922	6.01117	5.13567	5.43721	6.32971	4.92736	5.04347	5.26641	6.73973	5.11545	5.0736	5.53342	5.58365	5.58365	5.09197	5.71359	5.69952
246888_at	309.266	334.59	277.049	207.594	183.797	174.282	221.824	254.926	255.954	225.629	273.274	317.739	235.534	257.769	225.61	201.859	220.244	191.457
246889_at	10.2128	13.2549	10.3272	11.4309	8.97143	12.0401	10.2831	10.8847	10.6915	10.8276	10.1006	9.36838	13.9624	11.2798	11.3728	10.0666	9.35416	9.98017
246890_at	9.93273	9.31772	9.28105	8.26316	11.9249	10.6232	8.92841	9.23389	10.2831	9.14631	8.59729	7.99406	10.194	11.1916	10.2044	8.0547	12.1559	8.88706
246891_at	15.1804	23.1509	13.678	11.6928	27.0898	20.8503	15.6072	19.2916	20.1581	25.3593	16.6069	21.3395	13.8863	12.8789	17.56	14.8467	15.7082	14.0793
246892_at	7.84667	8.10849	8.81724	9.16587	8.86519	14.3379	8.73792	8.72393	9.41622	7.97798	11.7905	9.47792	9.49624	9.03058	9.27342	11.5641	9.06627	8.62806
246893_at	137.073	126.719	103.872	63.1156	89.9619	77.0617	97.8154	95.4557	89.77	57.4043	56.847	67.9243	102.815	107.324	81.677	94.213	86.9107	91.9798
246894_at	5.76925	5.65521	5.64407	5.51346	5.52752	5.42985	5.63851	5.83407	6.47939	5.57174	5.49943	5.36863	6.24987	6.19415	7.11089	5.49176	5.40181	5.47104
246895_at	431.754	436.408	444.166	440.967	405.429	432.837	518.617	533.899	498.932	502.067	590.549	488.819	465.117	497.479	466.361	717.771	565.051	547.941
246896_at	8.20616	9.5228	8.17504	8.03636	8.09617	7.27068	8.06679	9.08584	10.4546	8.2844	8.25315	7.51528	9.55827	13.773	10.0227	7.98241	6.74707	7.3693
246897_at	172.615	190.876	212.879	101.913	116.574	131.327	154.069	160.609	125.499	189.19	146.725	163.585	169.913	226.464	170.417	175.244	187.249	199.19
[truncated: 20,813 more rows]
